# Supplementary material for: Evaluating agreement between bodies of evidence from randomised controlled trials and cohort studies in nutrition research: meta-epidemiological study
Source: PubMed Central journal article supplement — BMJ. 2021 Sep 15;374:n1864. doi: 10.1136/bmj.n1864 (PMC8441535; doi:10.1136/bmj.n1864), 2021-09-15
Supplement: schl063523.ww.pdf [file schl063523.ww.pdf]

## **Data supplement**

Evaluating agreement between bodies of evidence from randomized controlled trials  
and cohort studies in nutrition research: a meta-epidemiological study

Lukas Schwingshackl<sup>1</sup>, Sara Balduzzi<sup>2</sup>, Jessica Beyerbach<sup>1</sup>, Nils Bröckelmann<sup>1</sup>, Sarah S Werner<sup>1</sup>,  
Jasmin Zähringer<sup>1</sup>, Blin Nagavci<sup>1</sup>, Joerg J Meerpohl<sup>1,3</sup>

<sup>1</sup>Institute for Evidence in Medicine, Medical Center - University of Freiburg, Faculty of Medicine,  
University of Freiburg, Freiburg, Germany.

<sup>2</sup>Institute of Medical Biometry and Statistics, Faculty of Medicine and Medical Center - University of  
Freiburg, Freiburg, Germany.

<sup>3</sup>Cochrane Germany, Cochrane Germany Foundation, Freiburg, Germany.

Corresponding author:

Lukas Schwingshackl, PhD

Breisacher Straße 86, 79110 Freiburg, Germany

M: schwingshackl@ifem.uni-freiburg.de

T: +49 (0)761 203-96867

Supplementary Appendix 1: Search strategy for systematic reviews of randomized controlled trials in the Cochrane Database of Systematic Reviews.

| ID  | Search                                                                                                                                                                                                                                                                                                                                         | Hits       |
|-----|------------------------------------------------------------------------------------------------------------------------------------------------------------------------------------------------------------------------------------------------------------------------------------------------------------------------------------------------|------------|
| #1  | MeSH descriptor: [Diet, Carbohydrate-Restricted] explode all trees                                                                                                                                                                                                                                                                             | 385        |
| #2  | MeSH descriptor: [Healthy Diet] explode all trees                                                                                                                                                                                                                                                                                              | 336        |
| #3  | MeSH descriptor: [Diet, Mediterranean] this term only                                                                                                                                                                                                                                                                                          | 434        |
| #4  | MeSH descriptor: [Dietary Approaches To Stop Hypertension] explode all trees                                                                                                                                                                                                                                                                   | 15         |
| #5  | MeSH descriptor: [Micronutrients] explode all trees                                                                                                                                                                                                                                                                                            | 4,992      |
| #6  | MeSH descriptor: [Dietary Supplements] explode all trees                                                                                                                                                                                                                                                                                       | 11,620     |
| #7  | (mediterranean or dash diet or low-carb* or low-fat* or grain* or vegetable* or fruit* or milk or dairy or meat or processed meat* or fish or eggs or nuts or chocolate or oil*):ti,ab,kw                                                                                                                                                      | 40,401     |
| #8  | (carbohydrate* or fructose or glucose or starch or sucrose or fibre or psyllium or inulin or cellulose or prebiotic* or probiotic* or synbiotic* or n-3 or omega 3 or omega-3 or n3 or n6 or n-6 or omega 6 or omega-6 or unsaturated or monounsaturated or polyunsaturated or EPA or DHA or linoleic acid or protein or amino acid*):ti,ab,kw | 167,040    |
| #9  | (vitamin* or beta-carot* or ascorbic acid or cholecalciferol* or ergocalciferol or thiamine or riboflavin or niacin or pyridoxine or cobalamin or folic acid or magnesium or calcium or selenium or sodium or potassium or iron or zinc or copper or iodine):ti,ab,kw                                                                          | 118,402    |
| #10 | #1 or #2 or #3 or #4 or #5 or #6 or #7 or #8 or #9                                                                                                                                                                                                                                                                                             | 283,530    |
| #11 | (diet* or nutrition or eat* or consum* or intake):ti,ab,kw                                                                                                                                                                                                                                                                                     | 163,651    |
| #12 | #10 and #11                                                                                                                                                                                                                                                                                                                                    | 83,677     |
| #13 | (mortal* or cancer or diabetes or dementia or macular degeneration or body weight or blood pressure or glucose or cholesterol*):ti,ab,kw                                                                                                                                                                                                       | 448,002    |
| #14 | #12 and #13                                                                                                                                                                                                                                                                                                                                    | 48,529     |
| #15 | Limit to "Cochrane Reviews" published between "2010 - 2019"                                                                                                                                                                                                                                                                                    | <b>333</b> |

Supplementary Appendix 2: Search strategy for systematic reviews of cohort studies in Ovid MEDLINE.

| ID  | Search                                                                                                                                                                                                                                                                                                                                       | Hits         |
|-----|----------------------------------------------------------------------------------------------------------------------------------------------------------------------------------------------------------------------------------------------------------------------------------------------------------------------------------------------|--------------|
| #1  | (non-randomised or non-randomized or nrs or observational* or cohort or prospective or longitudinal* or follow* or case-cohort or nested case-control or epidemio*).ti,ab,kf.                                                                                                                                                                | 4,466,200    |
| #2  | (meta-analys* or metaanalys* or "systematic review" or systematic-review).ti,ab.                                                                                                                                                                                                                                                             | 238,477      |
| #3  | (Systematic Review or Meta-Analysis).pt.                                                                                                                                                                                                                                                                                                     | 177,170      |
| #4  | #1 and (#2 or #3)                                                                                                                                                                                                                                                                                                                            | 104,427      |
| #5  | Diet, Mediterranean/ or Diet, Carbohydrate-Restricted/ or Healthy Diet/ or Dietary Approach to Stop Hypertension/ or Micronutrients/ or Dietary Supplements/                                                                                                                                                                                 | 65,391       |
| #6  | (mediterranean or dash diet or low-carb* or low-fat* or grain* or vegetable* or fruit* or milk or dairy or meat or processed meat* or fish or eggs or nuts or chocolate or oil*).ti,ab.                                                                                                                                                      | 733,079      |
| #7  | (carbohydrate* or fructose or glucose or starch or sucrose or fibre or psyllium or inulin or cellulose or prebiotic* or probiotic* or synbiotic* or n-3 or omega 3 or omega-3 or n3 or n6 or n-6 or omega 6 or omega-6 or unsaturated or monounsaturated or polyunsaturated or EPA or DHA or linoleic acid or protein or amino acid*).ti,ab. | 3,445,283    |
| #8  | (vitamin* or beta-carot* or ascorbic acid or cholecalciferol* or ergocalciferol or thiamine or riboflavin or niacin or pyridoxine or cobalamin or folic acid or magnesium or calcium or selenium or sodium or potassium or iron or zinc or copper or iodine).ti,ab.                                                                          | 1,391,454    |
| #9  | (diet* or nutrition or eat* or consum* or intake).ti,ab.                                                                                                                                                                                                                                                                                     | 1,173,600    |
| #10 | (#5 or #6 or #7 or #8) and #9                                                                                                                                                                                                                                                                                                                | 502,160      |
| #11 | #4 and #10                                                                                                                                                                                                                                                                                                                                   | 3,809        |
| #12 | limit #11 to yr="2010 - 2019"                                                                                                                                                                                                                                                                                                                | <b>3,118</b> |

Supplementary Table 1: Explanation and definition for Population (P), Intervention/Exposure (I/E), Comparator (C), Outcome (O) similarities.

|                               | Patients/population                                                                                                       | Intervention/Exposure                                                                                                                                                                                                                                                                                                                                                                                                                                                                                                                                                                                                                                              | Comparator                                                              | Outcome                                                                                                                                                  |
|-------------------------------|---------------------------------------------------------------------------------------------------------------------------|--------------------------------------------------------------------------------------------------------------------------------------------------------------------------------------------------------------------------------------------------------------------------------------------------------------------------------------------------------------------------------------------------------------------------------------------------------------------------------------------------------------------------------------------------------------------------------------------------------------------------------------------------------------------|-------------------------------------------------------------------------|----------------------------------------------------------------------------------------------------------------------------------------------------------|
| 1 = more or less identical    | Both bodies of evidence include primary or secondary prevention.                                                          | Both bodies of evidence use intake, supplements or status.                                                                                                                                                                                                                                                                                                                                                                                                                                                                                                                                                                                                         | Both bodies of evidence use (no) intake, supplements/placebo or status. | Same outcome.                                                                                                                                            |
|                               | e.g. people with cardiovascular disease in BoE from RCTs and CSs.                                                         | e.g. Folate supplements in BoE from RCTs and BoE from CSs.                                                                                                                                                                                                                                                                                                                                                                                                                                                                                                                                                                                                         | e.g. see Intervention/Exposure.                                         | e.g. Cardiovascular disease in BoE from RCTs and BoE from CSs.                                                                                           |
| 2 = similar but not identical | Both bodies of evidence include primary and secondary prevention or mixed population vs. primary or secondary prevention. | <ul style="list-style-type: none"> <li>- Intake vs. supplements.</li> <li>- Enriched / modified foods vs. intake.</li> <li>- Intake vs. urinary excretion.</li> <li>- Intake + supplements vs. intake.</li> <li>- Intake vs. intake on similar but not identical intervention /exposure</li> <li>- Supplements vs. supplements on similar but not identical intervention /exposure</li> </ul>                                                                                                                                                                                                                                                                      | see Intervention/Exposure.                                              | Same cluster of outcomes.                                                                                                                                |
|                               | e.g. healthy people and people with cardiovascular disease in RCTs vs. general healthy population in CSs.                 | <ul style="list-style-type: none"> <li>e.g.</li> <li>- Vitamin C supplements vs. Vitamin C intake.</li> <li>- Margarine enriched with <math>\alpha</math>-Linolenic acid vs. <math>\alpha</math>-Linolenic acid intake.</li> <li>- Substituted salt intake (with 65% sodium) vs. sodium intake.</li> <li>- Sodium intake vs. sodium intake and urinary sodium.</li> <li>- Fruit and vegetables intake vs. fruit or vegetables intake.</li> <li>- Low-fat intake vs. High-carbohydrate intake.</li> <li>- Increased fruit and vegetable intake + decreased fat intake vs. flavonoids intake.</li> <li>- Multi-micronutrient supplements vs. Multivitamin</li> </ul> | e.g. see Intervention/Exposure.                                         | <ul style="list-style-type: none"> <li>e.g.</li> <li>- Cardiovascular disease vs. coronary heart disease.</li> <li>- Mortality vs. incidence.</li> </ul> |

|                     |                                                                                                                          |                                                                                                               |                                 |                                                                                                   |
|---------------------|--------------------------------------------------------------------------------------------------------------------------|---------------------------------------------------------------------------------------------------------------|---------------------------------|---------------------------------------------------------------------------------------------------|
|                     |                                                                                                                          | supplements.                                                                                                  |                                 |                                                                                                   |
| 3 = broadly similar | Secondary (BoE from RCTs) vs. primary prevention (BoE from CSs), which means no healthy population in the BoE from RCTs. | - Intake or supplements vs. status.<br>- Supplements vs. intake on broadly similar intervention/exposure.     | see Intervention/Exposure.      | Broadly similar outcomes.<br>Continuous vs. dichotomous outcome (see also supplementary table 4). |
|                     | e.g. people with cardiovascular disease in RCTs vs. general healthy population in CSs.                                   | e.g.<br>- Vitamin D supplements vs. Vitamin D status.<br>- Vitamin A supplements vs. $\beta$ -carotene intake | e.g. see Intervention/Exposure. | e.g. Colorectal adenoma vs. colorectal cancer.                                                    |

BoE: bodies of evidence; CS: cohort study; RCT: randomized controlled trial.

Supplementary Table 2: Overview of transformations made to the original data extraction.

| Reference                                 | Outcome                        | n (studies) | Original  |               |      | What we used |               |      | Rationale                                                                                                                                         |
|-------------------------------------------|--------------------------------|-------------|-----------|---------------|------|--------------|---------------|------|---------------------------------------------------------------------------------------------------------------------------------------------------|
|                                           |                                |             | HR        | 95% CI        |      | RR           | 95% CI        |      |                                                                                                                                                   |
| Al-Khudairy et al. 2017 <sup>1</sup>      | Major cardiovascular events    | 1           | 0.99      | 0.89          | 1.10 | 0.99         | 0.89          | 1.10 | Number of randomised patients and patients with an event, per arm, taken from p. 20, table 2, of Sesso et al. 2008 <sup>2</sup> .                 |
| Al-Khudairy et al. 2017 <sup>1</sup>      | Cardiovascular mortality       | 1           | 1.02      | 0.85          | 1.22 | 1.01         | 0.85          | 1.20 |                                                                                                                                                   |
| Al-Khudairy et al. 2017 <sup>1</sup>      | All-cause mortality            | 1           | 1.07      | 0.97          | 1.18 | 1.06         | 0.97          | 1.16 |                                                                                                                                                   |
| Rees et al. 2019 <sup>3</sup>             | Cardiovascular mortality       | 1           | 0.81      | 0.5           | 1.32 | 0.93         | 0.60          | 1.45 | Number of randomised patients and patients with an event, per arm, taken from p. e34(8) table 3, of Estruch et al. 2018 <sup>4</sup> .            |
| Rees et al. 2019 <sup>3</sup>             | Combined cardiovascular events | 1           | 0.7       | 0.58          | 0.85 | 0.81         | 0.64          | 1.02 |                                                                                                                                                   |
| Rees et al. 2019 <sup>3</sup>             | All-cause mortality            | 1           | 1         | 0.81          | 1.24 | 1            | 0.81          | 1.25 |                                                                                                                                                   |
|                                           |                                |             | <b>OR</b> | <b>95% CI</b> |      | <b>RR</b>    | <b>95% CI</b> |      |                                                                                                                                                   |
| Hu et al. 2018 <sup>5</sup>               | Gestational diabetes           | 21          | 0.76      | 0.64          | 0.90 | 0.87         | 0.69          | 1.09 | ACR = 0.130, median of the risks observed in the control groups of the RCTs included in Palacios et al. 2019 <sup>6</sup> (Gestational diabetes). |
| Tous et al. 2020 <sup>7</sup>             | Preterm birth                  | 19          | 0.78      | 0.65          | 0.93 | 0.79         | 0.66          | 0.93 | ACR = 0.058, median of the risks observed in the control groups of the RCTs included in Palacios 2019 <sup>6</sup> (Preterm birth)                |
| Yuan et al. 2019 <sup>8</sup>             | Pre-eclampsia                  | 15          | 0.62      | 0.5           | 0.78 | 0.63         | 0.51          | 0.79 | ACR = 0.044, median of the risks observed in the control groups of the RCTs included in Palacios et al. 2019 <sup>6</sup> (Pre-eclampsia).        |
| Goodwill et al. 2017 <sup>9</sup>         | Dementia/MCI                   | 14          | 0.88      | 0.81          | 0.95 | 0.88         | 0.81          | 0.95 | ACR = 0.018, median of the risks observed in the control groups of the RCTs included in Rutjes et al. 2018 <sup>10</sup> (Dementia).              |
| Chia et al. 2019 <sup>11</sup>            | Preterm birth                  | 5           | 0.81      | 0.69          | 0.94 | 0.81         | 0.69          | 0.94 | ACR = 0.021, median of the risks observed in the control groups of the RCTs included in Tieu et al. 2017 <sup>12</sup> (Preterm birth).           |
| Chia et al. 2019 <sup>11</sup>            | Small gestational age          | 8           | 0.88      | 0.71          | 1.08 | 0.89         | 0.73          | 1.07 | ACR = 0.077, median of the risks observed in the control groups of the RCTs included in Tieu et al. 2017 <sup>12</sup> (Small gestational age).   |
| Mijatovic-Vukas et al. 2018 <sup>13</sup> | Gestational diabetes           | 4           | 0.70      | 0.62          | 0.80 | 0.74         | 0.66          | 0.83 | ACR = 0.164, median of the risks observed in the control groups of the RCTs included in Tieu et al. 2017 <sup>12</sup> (Gestational diabetes).    |
| Vinceti et al. 2018 <sup>14</sup>         | Cancer                         | 7           | 0.72      | 0.55          | 0.93 | 0.75         | 0.59          | 0.94 | ACR = 0.151, median of the risks observed in the control groups of the RCTs included in Vinceti et al. 2018 (Any cancer).                         |

|                                       |                   |    |           |               |      |           |               |      |                                                                                                                                                                                                                                                                                                                                         |
|---------------------------------------|-------------------|----|-----------|---------------|------|-----------|---------------|------|-----------------------------------------------------------------------------------------------------------------------------------------------------------------------------------------------------------------------------------------------------------------------------------------------------------------------------------------|
| Vinceti et al. 2018 <sup>14</sup>     | Cancer mortality  | 1  | 0.93      | 0.83          | 1.04 | 0.93      | 0.84          | 1.04 | ACR = 0.060, median of the risks observed in the control groups of the RCTs included in Vinceti et al. 2018 (Cancer mortality).                                                                                                                                                                                                         |
| Vinceti et al. 2018 <sup>14</sup>     | Colorectal cancer | 1  | 0.80      | 0.68          | 0.94 | 0.80      | 0.68          | 0.94 | ACR = 0.008, median of the risks observed in the control groups of the RCTs included in Vinceti et al. 2018 (Colorectal cancer).                                                                                                                                                                                                        |
|                                       |                   |    | <b>MD</b> | <b>95% CI</b> |      | <b>RR</b> | <b>95% CI</b> |      |                                                                                                                                                                                                                                                                                                                                         |
| Abdelhamid et al. 2018a <sup>15</sup> | Body weight       | 12 | -0.01     | -0.84         | 0.82 | 1.03      | 0.83          | 1.29 | The MD was standardised and the SMD re-expressed as an OR, by using the formula in paragraph 10.6 of the Cochrane Handbook. The OR was then transformed into a RR.<br>ACR = 0.065, risk observed in the only one study considered in Schlesinger et al. 2019 <sup>16</sup> , Supplemental Table 13 (Schulz et al. 2002 <sup>17</sup> ). |

ACR: assumed control risk; HR: hazard ratio; RR: risk ratio; OR: odds ratio; MD: mean difference.

Supplementary Table 3: Exclusion reasons of highly correlated outcome pairs from the meta-analysis.

| Reference pair                                                               | Intervention/Exposure    | Outcome                        | Reason for exclusion                                              |
|------------------------------------------------------------------------------|--------------------------|--------------------------------|-------------------------------------------------------------------|
| Abdelhamid et al. 2018a <sup>15</sup> + Chowdhury et al. 2014a <sup>18</sup> | Omega-3                  | Cardiovascular disease         | Highly likely correlated with outcome cardiovascular mortality    |
| Abdelhamid et al. 2018a <sup>15</sup> + Pan et al. 2012 <sup>19</sup>        | $\alpha$ -Linolenic acid | Cardiovascular disease         | Highly likely correlated with outcome cardiovascular mortality    |
| Abdelhamid et al. 2018a <sup>15</sup> + Wei et al. 2018 <sup>20</sup>        | $\alpha$ -Linolenic acid | Coronary heart disease         | Highly likely correlated with outcome cardiovascular mortality    |
| Abdelhamid et al. 2018b <sup>21</sup> + Zhu et al. 2019 <sup>22</sup>        | Polyunsaturated fat      | Major cardiovascular events    | Highly likely correlated with outcome coronary heart disease      |
| Adler et al. 2014 <sup>23</sup> + Aburto et al. 2013 <sup>24</sup>           | Low-sodium               | Cardiovascular disease         | Highly likely correlated with outcome cardiovascular mortality    |
| Adler et al. 2014 <sup>23</sup> + Leyvraz et al. 2018 <sup>25</sup>          | Low-sodium               | Diastolic blood pressure       | Highly likely correlated with outcome systolic blood pressure     |
| Al-Khudairy et al. 2017 <sup>1</sup> + Aune et al. 2018 <sup>26</sup>        | Vitamin C                | Cardiovascular mortality       | Highly likely correlated with outcome major cardiovascular events |
| Avenell et al. 2014 <sup>27</sup> + Feng et al. 2017 <sup>28</sup>           | Vitamin D                | Any fracture                   | Highly likely correlated with outcome hip fracture                |
| Bjelakovic et al. 2014b <sup>29</sup> + Hossain et al. 2019 <sup>30</sup>    | Vitamin D3               | Breast cancer                  | Highly likely correlated with outcome cancer                      |
| Bjelakovic et al. 2014b <sup>29</sup> + Zhang et al. 2015 <sup>31</sup>      | Vitamin D3               | Lung cancer                    | Highly likely correlated with outcome cancer                      |
| Hofmeyr et al. 2018 <sup>32</sup> + Newberry et al. 2014 <sup>33</sup>       | Calcium                  | High blood pressure            | Highly likely correlated with outcome pre-eclampsia               |
| Hooper et al. 2012 <sup>34</sup> + Zhu et al. 2019 <sup>22</sup>             | Low-fat/modified fat     | Combined cardiovascular events | Highly likely correlated with outcome cardiovascular mortality    |
| Hooper et al. 2015b <sup>35</sup> + de Souza et al. 2015 <sup>36</sup>       | Low saturated fat        | Combined cardiovascular events | Highly likely correlated with outcome cardiovascular mortality    |
| Hooper et al. 2018 <sup>37</sup> + Chowdhury et al. 2014a <sup>18</sup>      | Omega-6                  | Combined cardiovascular events | Highly likely correlated with outcome cardiovascular mortality    |
| Keats et al. 2019 <sup>38</sup> + Wolf et al. 2017 <sup>39</sup>             | Micronutrients           | Low birth weight               | Highly likely correlated with outcome preterm birth               |
| Keats et al. 2019 <sup>38</sup> + Wolf et al. 2017 <sup>39</sup>             | Micronutrients           | Small gestational age          | Highly likely correlated with outcome preterm birth               |
| Palacios et al. 2019 <sup>6</sup> + Tous et al. 2020 <sup>7</sup>            | Vitamin D                | Birth weight                   | Highly likely correlated with outcome birth length                |
| Palacios et al. 2019 <sup>6</sup> +                                          | Vitamin D                | Head circumference at birth    | Highly likely correlated with outcome birth                       |



|                                                                            |                    |                                |                                                                |
|----------------------------------------------------------------------------|--------------------|--------------------------------|----------------------------------------------------------------|
| Tous et al. 2020 <sup>7</sup>                                              |                    |                                | length                                                         |
| Rees et al. 2013a <sup>40</sup> +<br>Kastorini et al. 2011 <sup>41</sup>   | Healthy diet       | Diastolic blood pressure       | Highly likely correlated with outcome systolic blood pressure  |
| Rees et al. 2013b <sup>42</sup> +<br>Zhang et al. 2016a <sup>43</sup>      | Selenium           | Combined cardiovascular events | Highly likely correlated with outcome cardiovascular mortality |
| Rees et al. 2019 <sup>3</sup> +<br>Kastorini et al. 2011 <sup>41</sup>     | Mediterranean diet | Triglycerides                  | Highly likely correlated with outcome high density lipoprotein |
| Rees et al. 2019 <sup>3</sup> +<br>Kastorini et al. 2011 <sup>41</sup>     | Mediterranean diet | Systolic blood pressure        | Highly likely correlated with outcome high density lipoprotein |
| Rees et al. 2019 <sup>3</sup> +<br>Rosato et al. 2019 <sup>44</sup>        | Mediterranean diet | Combined cardiovascular events | Highly likely correlated with outcome cardiovascular mortality |
| Tieu et al. 2017 <sup>12</sup> +<br>Chia et al. 2019 <sup>11</sup>         | Healthy diet       | Preterm birth                  | Highly likely correlated with outcome small gestational age    |
| Vinceti et al. 2018 <sup>14</sup> +<br>Vinceti et al. 2018 <sup>14</sup> + | Selenium           | Cancer mortality               | Highly likely correlated with outcome cancer                   |
| Vinceti et al. 2018 <sup>14</sup> +<br>Vinceti et al. 2018 <sup>14</sup> + | Selenium           | Colorectal cancer              | Highly likely correlated with outcome cancer                   |
| Yao et al. 2017 <sup>45</sup> +<br>Ben et al. 2014 <sup>46</sup>           | Fibre              | Colorectal adenoma             | Highly likely correlated with outcome colorectal cancer        |

Supplementary data

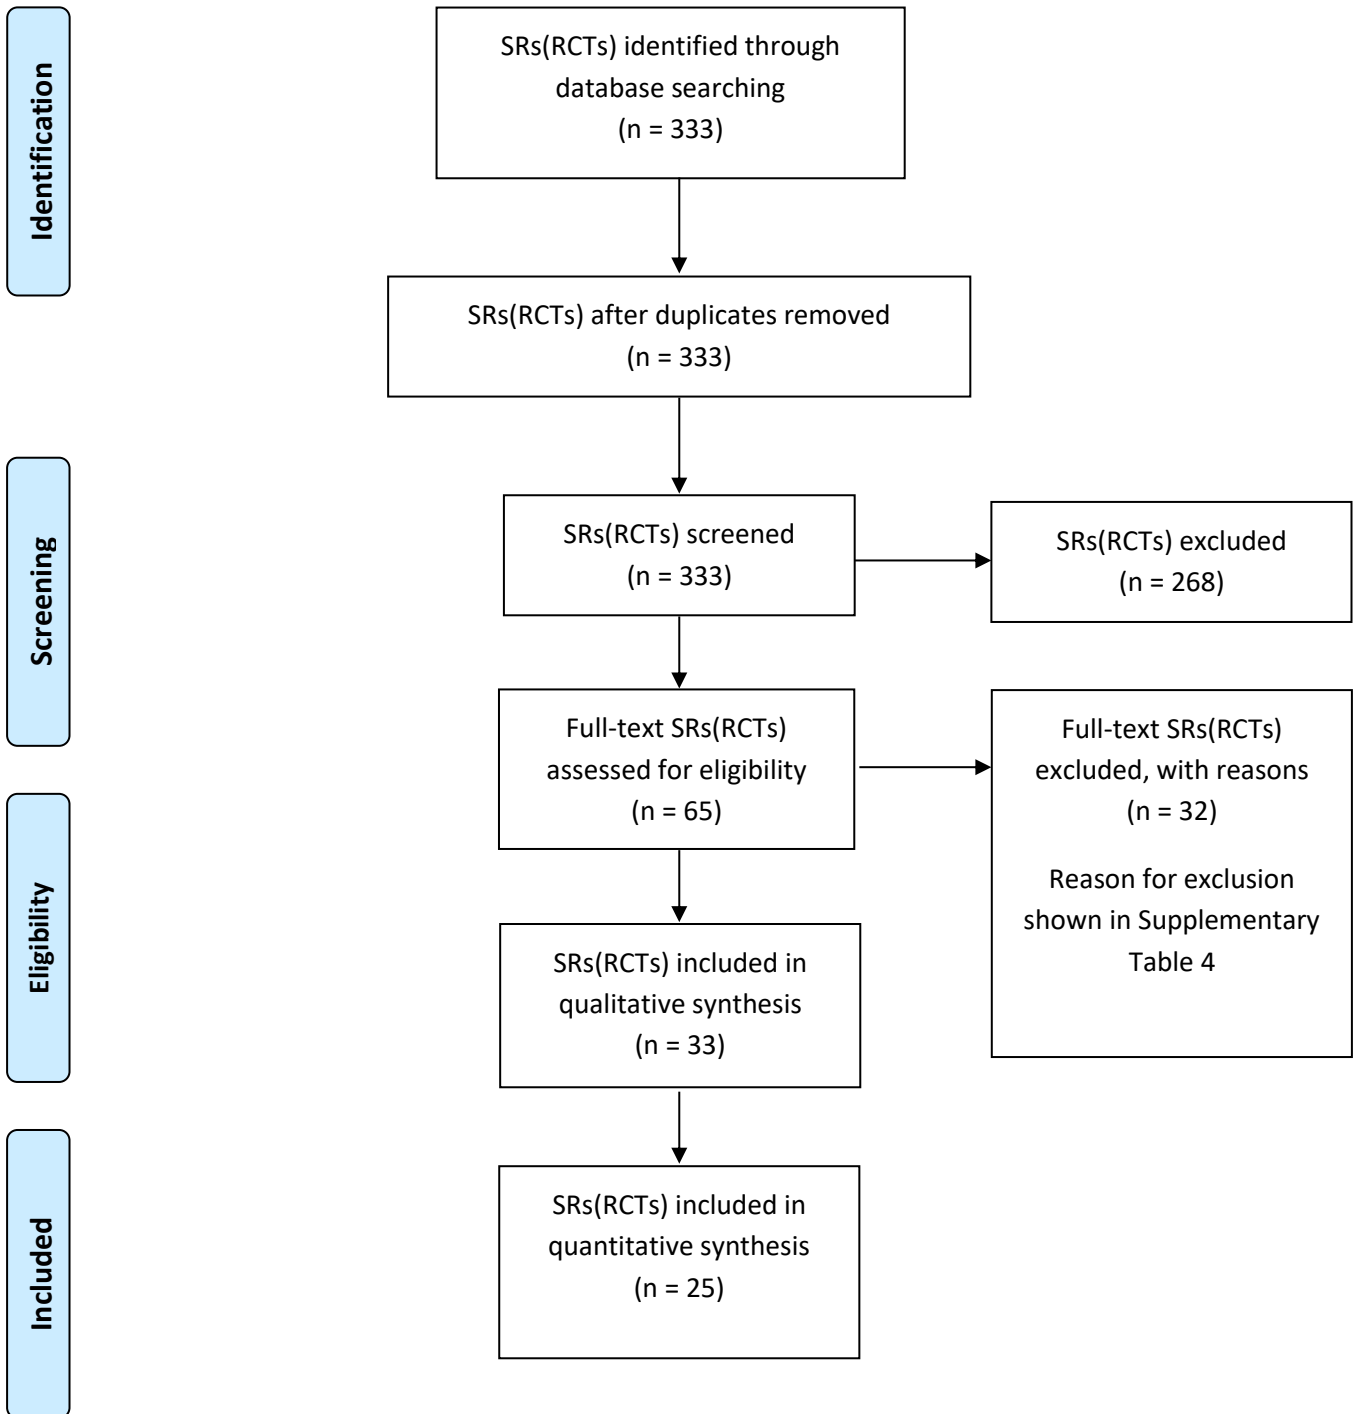

Supplementary Figure 1: Flow diagram showing study selection process for eligible Cochrane Reviews. RCTs: randomized controlled trials; SR: systematic review.

Supplementary data

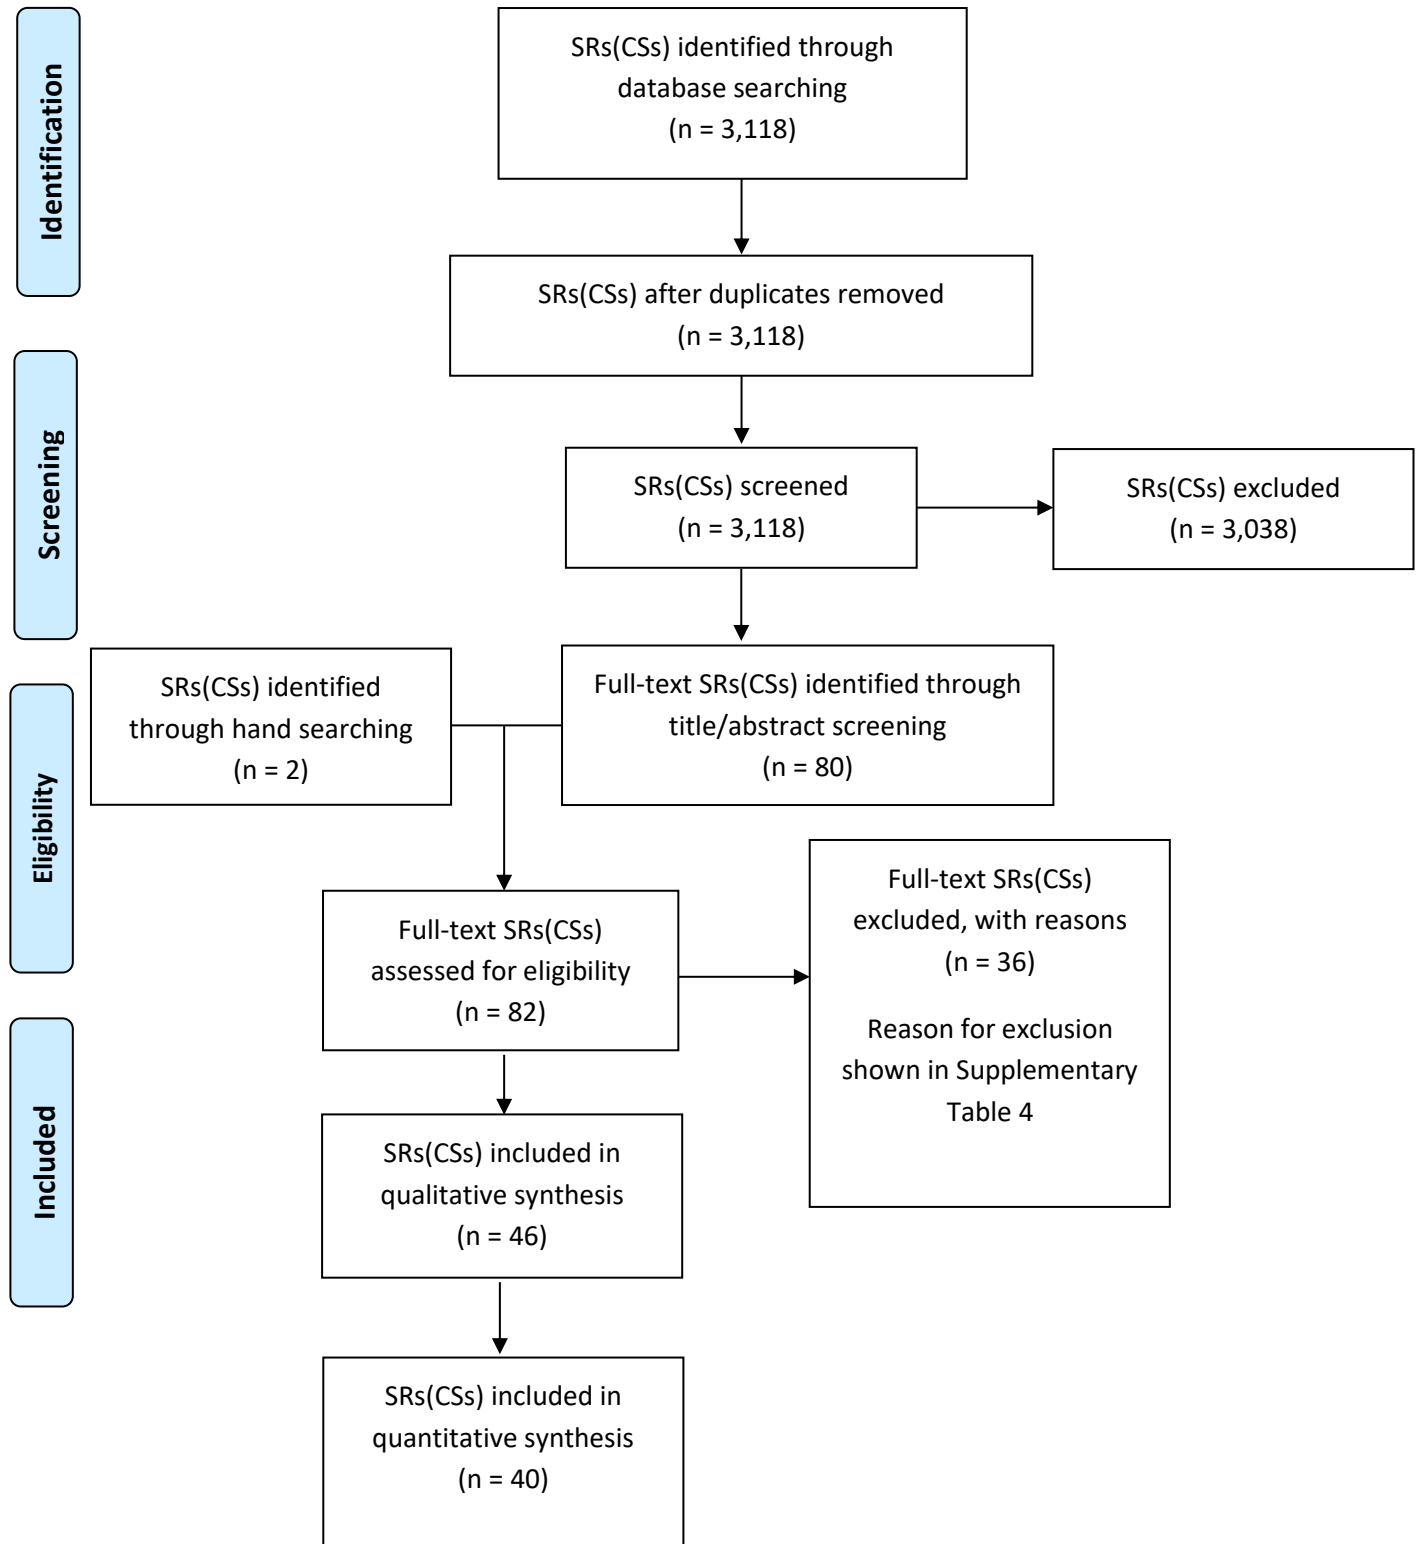

Supplementary Figure 2: Flow diagram showing study selection process for systematic reviews (SRs) of cohort studies (CSs).

Supplementary data

Supplementary Table 4: Reason for exclusion

| Reference                                                 | Reason for exclusion                                                                                                                     |
|-----------------------------------------------------------|------------------------------------------------------------------------------------------------------------------------------------------|
| <b>Systematic reviews of randomized controlled trials</b> |                                                                                                                                          |
| 47-60                                                     | Did not fulfil PICO inclusion criteria (see PICO criteria Table 1).                                                                      |
| 61-78                                                     | No corresponding systematic review of cohort studies on dietary intake and or biomarker of dietary intake was available.                 |
| <b>Systematic reviews of cohort studies</b>               |                                                                                                                                          |
| 79-82                                                     | Did not fulfil PECO inclusion criteria (see PECO criteria Table 1).                                                                      |
| 83-89                                                     | More recent or appropriate systematic review of cohort studies available (e.g. higher number of included studies, better matching PECO). |
| 90-114                                                    | No body of randomized controlled trials (Cochrane Reviews) available.                                                                    |

PI/ECO: population, intervention/exposure, comparator, outcome.

Supplementary data

Supplementary Table 5: Effect estimates of included bodies of evidence from randomized controlled trials and cohort studies.

| Bodies of evidence from randomized controlled trials (Cochrane Reviews) |                                          |                                     |            |                                               | Bodies of evidence from cohort studies |                                      |                       |                                     |            |                                               | Overall PI/ECO similarity degree<br>(1 = more or less identical)<br>(2 = similar but not identical)<br>(3 = broadly similar) | Included in the meta-analysis<br>(Yes/ No) |
|-------------------------------------------------------------------------|------------------------------------------|-------------------------------------|------------|-----------------------------------------------|----------------------------------------|--------------------------------------|-----------------------|-------------------------------------|------------|-----------------------------------------------|------------------------------------------------------------------------------------------------------------------------------|--------------------------------------------|
| Reference                                                               | Intervention and type of intake          | Outcome (as defined by the authors) | Studies, n | Summary measure, and effect estimate (95% CI) | Reference                              | Exposure and type of intake/exposure | Comparison            | Outcome (as defined by the authors) | Studies, n | Summary measure, and effect estimate (95% CI) |                                                                                                                              |                                            |
| Abdelhamid et al. 2018a <sup>15</sup>                                   | Omega-3 intake + supplements             | Cardiovascular mortality            | 25         | RR: 0.95 (0.87, 1.03)                         | Chowdhury et al. 2014a <sup>18</sup>   | Omega-3 intake                       | T3 vs. T1             | Coronary heart disease mortality    | NA         | RR: 0.90 (0.70, 1.14)                         | 3                                                                                                                            | Y                                          |
| Abdelhamid et al. 2018a <sup>15</sup>                                   | Omega-3 intake + supplements             | Cardiovascular disease              | 38         | RR: 0.99 (0.94, 1.04)                         | Chowdhury et al. 2014a <sup>18</sup>   | Omega-3 intake                       | T3 vs. T1             | Coronary heart disease              | 16         | RR: 0.87 (0.78, 0.97)                         | 2                                                                                                                            | Y                                          |
| Abdelhamid et al. 2018a <sup>15</sup>                                   | $\alpha$ -Linolenic acid intake          | Cardiovascular disease              | 5          | RR: 0.95 (0.83, 1.07)                         | Pan et al. et al. 2012 <sup>19</sup>   | $\alpha$ -Linolenic acid intake      | High vs. Low          | Cardiovascular disease              | 11         | RR: 0.93 (0.85, 1.03)                         | 2                                                                                                                            | Y                                          |
| Abdelhamid et al. 2018a <sup>15</sup>                                   | Omega-3 intake + supplements             | Body weight (kg)                    | 12         | MD: -0.01 (-0.84, 0.82)                       | Schlesinger et al. 2019 <sup>16</sup>  | Fish intake                          | per 100 g/d increment | Weight gain                         | 1          | RR: 1.06 (0.83, 1.35)                         | 3                                                                                                                            | Y                                          |
| Abdelhamid et al. 2018a <sup>15</sup>                                   | Omega-3 intake + supplements             | All-cause mortality                 | 39         | RR: 0.98 (0.93, 1.03)                         | Wan et al. 2017 <sup>115</sup>         | Omega-3 intake                       | High vs. Low          | All-cause mortality                 | 6          | RR: 0.86 (0.80, 0.93)                         | 2                                                                                                                            | Y                                          |
| Abdelhamid et al. 2018a <sup>15</sup>                                   | $\alpha$ -Linolenic acid intake          | Cardiovascular mortality            | 4          | RR: 0.96 (0.74, 1.25)                         | Wei et al. 2018 <sup>20</sup>          | $\alpha$ -Linolenic acid intake      | High vs. Low          | Coronary heart disease mortality    | 9          | RR: 0.85 (0.75, 0.96)                         | 2                                                                                                                            | Y                                          |
| Abdelhamid et al. 2018a <sup>15</sup>                                   | $\alpha$ -Linolenic acid intake          | Coronary heart disease              | 4          | RR: 1.00 (0.82, 1.22)                         | Wei et al. 2018 <sup>20</sup>          | $\alpha$ -Linolenic acid intake      | High vs. Low          | Coronary heart disease              | 13         | RR: 0.91 (0.85, 0.97)                         | 2                                                                                                                            | Y                                          |
| Abdelhamid et al. 2018b <sup>21</sup>                                   | Polyunsaturated fat intake + supplements | All-cause mortality                 | 24         | RR: 0.98 (0.89, 1.07)                         | Li et al. 2020 <sup>116</sup>          | Linoleic acid intake                 | High vs. Low          | All-cause mortality                 | 11         | RR: 0.87 (0.81, 0.94)                         | 2                                                                                                                            | Y                                          |
| Abdelhamid et al. 2018b <sup>21</sup>                                   | Polyunsaturated fat intake + supplements | Coronary heart disease              | 15         | RR: 0.87 (0.72, 1.06)                         | Chowdhury et al. 2014a <sup>18</sup>   | Omega-6 intake                       | T3 vs. T1             | Coronary heart disease              | 8          | RR: 0.98 (0.90, 1.06)                         | 2                                                                                                                            | Y                                          |
| Abdelhamid et al. 2018b <sup>21</sup>                                   | Polyunsaturated fat intake               | Major cardiovascular events         | 2          | RR: 0.84 (0.59, 1.20)                         | Zhu et al. 2019 <sup>22</sup>          | Polyunsaturated fat intake           | High vs. Low          | Cardiovascular disease              | 30         | RR: 0.97 (0.93, 1.00)                         | 2                                                                                                                            | Y                                          |
| Adler et al. 2014 <sup>23</sup>                                         | Low-sodium intake                        | All-cause mortality                 | 7          | RR: 0.96 (0.83, 1.10)                         | Aburto et al. 2013 <sup>24</sup>       | Low-sodium intake                    | Low vs. High          | All-cause mortality                 | 2          | RR: 0.95 (0.71, 1.27)                         | 2                                                                                                                            | Y                                          |
| Adler et al. 2014 <sup>23</sup>                                         | Low-sodium intake                        | Cardiovascular mortality            | 3          | RR: 0.67 (0.45, 1.01)                         | Aburto et al. 2013 <sup>24</sup>       | Low-sodium intake                    | Low vs. High          | Cardiovascular mortality            | 3          | RR: 0.87 (0.64, 1.18)                         | 2                                                                                                                            | Y                                          |
| Adler et al. 2014 <sup>23</sup>                                         | Low-sodium intake                        | Cardiovascular disease              | 4          | RR: 0.76 (0.57, 1.01)                         | Aburto et al. 2013 <sup>24</sup>       | Low-sodium intake                    | Low vs. High          | Cardiovascular disease              | 3          | RR: 0.87 (0.64, 1.18)                         | 2                                                                                                                            | Y                                          |
| Adler et al. 2014 <sup>23</sup>                                         | Low-sodium intake                        | Systolic blood pressure (mmHg)      | 6          | MD: -1.79 (-3.23, -0.36)                      | Leyvraz et al. 2018 <sup>25</sup>      | Low-sodium intake + status           | Low vs. High          | Systolic blood pressure (mmHg)      | 1          | MD: -1.20 (-1.50, -0.90)                      | 3                                                                                                                            | Y                                          |
| Adler et al. 2014 <sup>23</sup>                                         | Low-sodium intake                        | Diastolic blood pressure (mmHg)     | 5          | MD: -1.17 (-2.08, -0.26)                      | Leyvraz et al. 2018 <sup>25</sup>      | Low-sodium intake + status           | Low vs. High          | Diastolic blood pressure (mmHg)     | 1          | MD: 1.20 (1.00, 1.50)                         | 3                                                                                                                            | Y                                          |

## Supplementary data

|                                        |                               |                                     |    |                          |                                          |                              |                       |                          |    |                       |   |   |
|----------------------------------------|-------------------------------|-------------------------------------|----|--------------------------|------------------------------------------|------------------------------|-----------------------|--------------------------|----|-----------------------|---|---|
| Al-Khudairy et al. 2017 <sup>1</sup>   | Vitamin C supplements         | Major cardiovascular events         | 1  | HR: 0.99 (0.89, 1.10)    | Aune et al. 2018 <sup>26</sup>           | Vitamin C intake             | High vs. Low          | Cardiovascular disease   | 9  | RR: 0.84 (0.77, 0.91) | 2 | Y |
| Al-Khudairy et al. 2017 <sup>1</sup>   | Vitamin C supplements         | Cardiovascular mortality            | 1  | HR: 1.02 (0.85, 1.22)    | Aune et al. 2018 <sup>26</sup>           | Vitamin C intake             | Per 100 mg/d increase | Cardiovascular mortality | 9  | RR: 0.88 (0.83, 0.94) | 2 | Y |
| Al-Khudairy et al. 2017 <sup>1</sup>   | Vitamin C supplements         | All-cause mortality                 | 1  | HR: 1.07 (0.97, 1.18)    | Aune et al. 2018 <sup>26</sup>           | Vitamin C intake             | High vs. Low          | All-cause mortality      | 16 | RR: 0.86 (0.80, 0.92) | 2 | Y |
| Avenell et al. 2014 <sup>27</sup>      | Vitamin D supplements         | Hip fracture                        | 10 | RR: 1.12 (0.97, 1.30)    | Feng et al. 2017 <sup>28</sup>           | Vitamin D status             | High vs. Low          | Hip fracture             | 11 | RR: 0.68 (0.60, 0.78) | 3 | Y |
| Avenell et al. 2014 <sup>27</sup>      | Vitamin D supplements         | Any fracture                        | 14 | RR: 1.04 (0.96, 1.12)    | Feng et al. 2017 <sup>28</sup>           | Vitamin D status             | High vs. Low          | Any fracture             | 11 | RR: 0.80 (0.68, 0.94) | 3 | Y |
| Bjelakovic et al. 2012 <sup>117</sup>  | $\beta$ -carotene supplements | All-cause mortality                 | 31 | RR: 1.02 (0.98, 1.07)    | Aune et al. 2018 <sup>26</sup>           | $\beta$ -carotene intake     | High vs. Low          | All-cause mortality      | 8  | RR: 0.82 (0.78, 0.87) | 2 | Y |
| Bjelakovic et al. 2012 <sup>117</sup>  | Vitamin E supplements         | All-cause mortality                 | 64 | RR: 1.02 (0.99, 1.04)    | Aune et al. 2018 <sup>26</sup>           | Vitamin E intake             | High vs. Low          | All-cause mortality      | 9  | RR: 0.98 (0.93, 1.04) | 2 | Y |
| Bjelakovic et al. 2012 <sup>117</sup>  | Vitamin C supplements         | All-cause mortality                 | 41 | RR: 1.01 (0.97, 1.05)    | Aune et al. 2018 <sup>26</sup>           | Vitamin C intake             | High vs. Low          | All-cause mortality      | 16 | RR: 0.86 (0.80, 0.92) | 2 | Y |
| Bjelakovic et al. 2012 <sup>117</sup>  | Vitamin A supplements         | All-cause mortality                 | 18 | RR: 1.04 (0.96, 1.13)    | Aune et al. 2018 <sup>26</sup>           | $\beta$ -carotene intake     | High vs. Low          | All-cause mortality      | 8  | RR: 0.82 (0.78, 0.87) | 3 | Y |
| Bjelakovic et al. 2014a <sup>118</sup> | Vitamin D supplements         | All-cause mortality                 | 56 | RR: 0.97 (0.94, 0.99)    | Chowdhury et al. 2014b <sup>119</sup>    | Vitamin D status             | T3 vs. T1             | All-cause mortality      | 68 | RR: 0.69 (0.65, 0.75) | 3 | Y |
| Bjelakovic et al. 2014a <sup>118</sup> | Vitamin D supplements         | Cardiovascular mortality            | 10 | RR: 0.98 (0.90, 1.07)    | Chowdhury et al. 2014b <sup>119</sup>    | Vitamin D status             | T3 vs. T1             | Cardiovascular mortality | 29 | RR: 0.70 (0.61, 0.80) | 3 | Y |
| Bjelakovic et al. 2014a <sup>118</sup> | Vitamin D supplements         | Cancer mortality                    | 4  | RR: 0.88 (0.78, 0.98)    | Han et al. 2019 <sup>120</sup>           | Vitamin D status             | High vs. Low          | Cancer mortality         | 16 | RR: 0.81 (0.71, 0.93) | 3 | Y |
| Bjelakovic et al. 2014b <sup>29</sup>  | Vitamin D supplements         | Cancer occurrence                   | 18 | RR: 1.00 (0.94, 1.06)    | Han et al. 2019 <sup>120</sup>           | Vitamin D status             | High vs. Low          | Cancer incidence         | 8  | RR: 0.86 (0.73, 1.02) | 3 | Y |
| Bjelakovic et al. 2014b <sup>29</sup>  | Vitamin D3 supplements        | Breast cancer                       | 7  | RR: 0.97 (0.86, 1.09)    | Hossain et al. 2019 <sup>30</sup>        | Vitamin D supplements        | Yes vs. No            | Breast cancer            | 2  | RR: 0.94 (0.87, 1.02) | 2 | Y |
| Bjelakovic et al. 2014b <sup>29</sup>  | Vitamin D3 supplements        | Lung cancer                         | 5  | RR: 0.86 (0.69, 1.07)    | Zhang et al. 2015 <sup>31</sup>          | Vitamin D intake             | High vs. Low          | Lung cancer              | 3  | RR: 0.89 (0.74, 1.06) | 2 | Y |
| Cormick et al. 2015 <sup>121</sup>     | Calcium supplements           | Systolic blood pressure (mmHg)      | 16 | MD: -1.43 (-2.15, -0.72) | Jayedi et al. 2019 <sup>122</sup>        | Calcium intake + supplements | High vs. Low          | Hypertension             | 8  | RR: 0.89 (0.86, 0.93) | 3 | N |
| Cormick et al. 2015 <sup>121</sup>     | Calcium supplements           | Diastolic blood pressure (mmHg)     | 15 | MD: -0.98 (-1.46, -0.50) | Jayedi et al. 2019 <sup>122</sup>        | Calcium intake + supplements | High vs. Low          | Hypertension             | 8  | RR: 0.89 (0.86, 0.93) | 3 | N |
| De-Regil et al. 2015 <sup>123</sup>    | Folate supplements            | Neural tube defect                  | 5  | RR: 0.31 (0.17, 0.58)    | Blencowe et al. 2010 <sup>124</sup>      | Folate supplements           | Yes vs. No            | Neural tube defect       | 3  | RR: 0.37 (0.23, 0.58) | 2 | Y |
| De-Regil et al. 2015 <sup>123</sup>    | Folate supplements            | Congenital cardiovascular anomalies | 3  | RR: 0.57 (0.24, 1.33)    | Feng et al. 2015 <sup>125</sup>          | Folate supplements           | Yes vs. No            | Congenital heart defect  | 1  | RR: 0.60 (0.38, 0.96) | 2 | Y |
| El Dib et al. 2015 <sup>126</sup>      | Zinc supplements              | HOMA-IR                             | 1  | MD: -0.10 (-1.28, 1.08)  | Fernandez-Cao et al. 2019 <sup>127</sup> | Zinc supplements             | Yes vs. No            | Type 2 diabetes          | 2  | RR: 0.94 (0.75, 1.19) | 3 | N |
| Hartley et al. 2013 <sup>128</sup>     | Fruit & Vegetables intake     | Systolic blood pressure (mmHg)      | 2  | MD: -3.00 (-4.92, -1.09) | Schwingshackl et al. 2017 <sup>129</sup> | Fruit intake                 | High vs. Low          | Hypertension             | 7  | RR: 0.93 (0.87, 1.00) | 3 | N |

## Supplementary data

|                                       |                                               |                                 |    |                          |                                          |                          |              |                          |    |                       |   |   |
|---------------------------------------|-----------------------------------------------|---------------------------------|----|--------------------------|------------------------------------------|--------------------------|--------------|--------------------------|----|-----------------------|---|---|
| Hartley et al. 2013 <sup>128</sup>    | Fruit & Vegetables intake                     | Diastolic blood pressure (mmHg) | 2  | MD: -0.90 (-2.03, 0.24)  | Schwingshackl et al. 2017 <sup>129</sup> | Vegetables intake        | High vs. Low | Hypertension             | 8  | RR: 0.96 (0.91, 1.01) | 3 | N |
| Hartley et al. 2016 <sup>130</sup>    | Fibre intake + supplements                    | Systolic blood pressure (mmHg)  | 8  | MD: -1.92 (-4.02, 0.19)  | Schwingshackl et al. 2017 <sup>129</sup> | Whole grain intake       | High vs. Low | Hypertension             | 4  | RR: 0.86 (0.79, 0.93) | 3 | N |
| Hartley et al. 2016 <sup>130</sup>    | Fibre intake +supplements                     | Diastolic blood pressure (mmHg) | 8  | MD: -1.77 (-2.61, -0.92) | Schwingshackl et al. 2017 <sup>129</sup> | Whole grain intake       | High vs. Low | Hypertension             | 4  | RR: 0.86 (0.79, 0.93) | 3 | N |
| Hemmingsen et al. 2017 <sup>131</sup> | Healthy diet (intake)                         | Type 2 diabetes                 | 1  | RR: 0.65 (0.52, 0.81)    | Schwingshackl et al. 2018 <sup>132</sup> | Diet quality (intake)    | High vs. Low | Type 2 diabetes          | 10 | RR: 0.82 (0.78, 0.85) | 2 | Y |
| Hemmingsen et al. 2017 <sup>131</sup> | Healthy diet (intake)                         | All-cause mortality             | 1  | RR: 1.02 (0.21, 4.98)    | Schwingshackl et al. 2018 <sup>132</sup> | Diet quality (intake)    | High vs. Low | All-cause mortality      | 13 | RR: 0.78 (0.77, 0.80) | 2 | Y |
| Hofmeyr et al. 2018 <sup>32</sup>     | Calcium supplements                           | Pre-eclampsia                   | 13 | RR: 0.45 (0.31, 0.65)    | Newberry et al. 2014 <sup>33</sup>       | Calcium intake           | High vs. Low | Pre-eclampsia            | 2  | RR: 0.97 (0.78, 1.21) | 2 | Y |
| Hofmeyr et al. 2018 <sup>32</sup>     | Calcium supplements                           | High blood pressure             | 12 | RR: 0.65 (0.53, 0.81)    | Newberry et al. 2014 <sup>33</sup>       | Calcium intake           | High vs. Low | High blood pressure      | 2  | RR: 1.12 (0.83, 1.50) | 2 | Y |
| Hooper et al. 2012 <sup>34</sup>      | Low-fat / modified fat (intake + supplements) | Cardiovascular mortality        | 14 | RR: 0.94 (0.85, 1.04)    | Noto et al. 2013 <sup>133</sup>          | High-carbohydrate intake | High vs. Low | Cardiovascular mortality | 3  | RR: 0.91 (0.81, 1.02) | 2 | Y |
| Hooper et al. 2012 <sup>34</sup>      | Low-fat / modified fat (intake + supplements) | All-cause mortality             | 20 | RR: 0.98 (0.93, 1.04)    | Seidemann et al. 2018 <sup>134</sup>     | High-carbohydrate intake | High vs. Low | All-cause mortality      | 6  | RR: 0.83 (0.76, 0.92) | 2 | Y |
| Hooper et al. 2012 <sup>34</sup>      | Low-fat / modified fat (intake + supplements) | Combined cardiovascular events  | 18 | RR: 0.86 (0.77, 0.96)    | Zhu et al. 2019 <sup>22</sup>            | Low-fat intake           | Low vs. High | Cardiovascular disease   | 32 | RR: 1.03 (0.99, 1.08) | 2 | Y |
| Hooper et al. 2012 <sup>34</sup>      | Low-fat intake                                | Body weight (kg)                | 16 | MD: -0.83 (-1.37, -0.30) | Sartorius et al. 2018 <sup>135</sup>     | High-carbohydrate intake | High vs. Low | Obesity                  | 2  | RR: 1.06 (1.00, 1.12) | 3 | N |
| Hooper et al. 2015a <sup>136</sup>    | Low-fat intake                                | Body weight (kg)                | 25 | MD: -1.54 (-1.97, -1.12) | Sartorius et al. 2018 <sup>135</sup>     | High-carbohydrate intake | High vs. Low | Obesity                  | 2  | RR: 1.06 (1.00, 1.12) | 3 | N |
| Hooper et al. 2015b <sup>35</sup>     | Low saturated fat intake                      | All-cause mortality             | 11 | RR: 0.97 (0.90, 1.05)    | de Souza et al. 2015 <sup>36</sup>       | Low saturated fat intake | Low vs. High | All-cause mortality      | 5  | RR: 1.01 (0.92, 1.10) | 2 | Y |
| Hooper et al. 2015b <sup>35</sup>     | Low saturated fat intake                      | Cardiovascular mortality        | 10 | RR: 0.95 (0.80, 1.12)    | de Souza et al. 2015 <sup>36</sup>       | Low saturated fat intake | Low vs. High | Cardiovascular mortality | 3  | RR: 1.03 (0.89, 1.19) | 2 | Y |
| Hooper et al. 2015b <sup>35</sup>     | Low saturated fat intake                      | Combined cardiovascular events  | 11 | RR: 0.83 (0.72, 0.96)    | de Souza et al. 2015 <sup>36</sup>       | Low saturated fat intake | Low vs. High | Coronary heart disease   | 12 | RR: 0.94 (0.85, 1.05) | 2 | Y |
| Hooper et al. 2018 <sup>37</sup>      | Omega-6 intake + supplements                  | Combined cardiovascular events  | 7  | RR: 0.97 (0.81, 1.15)    | Chowdhury et al. 2014a <sup>18</sup>     | Omega-6 intake           | High vs. Low | Coronary heart disease   | 8  | RR: 0.98 (0.90, 1.06) | 2 | Y |
| Hooper et al. 2018 <sup>37</sup>      | Omega-6 intake + supplements                  | All-cause mortality             | 10 | RR: 1.00 (0.88, 1.12)    | Li et al. 2020 <sup>116</sup>            | Linoleic acid intake     | High vs. Low | All-cause mortality      | 11 | RR: 0.87 (0.81, 0.94) | 2 | Y |

## Supplementary data

|                                   |                              |                                  |    |                          |                                          |                             |              |                                  |    |                           |   |   |
|-----------------------------------|------------------------------|----------------------------------|----|--------------------------|------------------------------------------|-----------------------------|--------------|----------------------------------|----|---------------------------|---|---|
| Hooper et al. 2018 <sup>37</sup>  | Omega-6 intake + supplements | Cardiovascular mortality         | 7  | RR: 1.09 (0.76, 1.55)    | Li et al. 2020 <sup>116</sup>            | Linoleic acid intake        | High vs. Low | Cardiovascular mortality         | 14 | RR: 0.87 (0.82, 0.92)     | 2 | Y |
| Jin et al. 2012 <sup>137</sup>    | Total flavonoids intake      | Colorectal adenoma               | 1  | RR: 1.09 (0.93, 1.28)    | Jin et al. 2012 <sup>137</sup>           | Total flavonoids intake     | High vs. Low | Colorectal cancer                | 3  | RR: 1.00 (0.80, 1.25)     | 3 | Y |
| Jin et al. 2012 <sup>137</sup>    | Isoflavonoes intake          | Colorectal adenoma               | 1  | RR: 0.98 (0.83, 1.16)    | Jin et al. 2012 <sup>137</sup>           | Isoflavonoes intake         | High vs. Low | Colorectal cancer                | 1  | RR: 1.16 (0.96, 1.41)     | 3 | Y |
| Jin et al. 2012 <sup>137</sup>    | Flavonols intake             | Colorectal adenoma               | 1  | RR: 0.94 (0.80, 1.10)    | Jin et al. 2012 <sup>137</sup>           | Flavonols intake            | High vs. Low | Colorectal cancer                | 1  | RR: 0.95 (0.83, 1.08)     | 3 | Y |
| Keats et al. 2019 <sup>38</sup>   | Micronutrients supplements   | Preterm birth                    | 18 | RR: 0.95 (0.90, 1.01)    | Wolf et al. 2017 <sup>39</sup>           | Multivitamin supplements    | Yes vs. No   | Preterm birth                    | 4  | RR: 0.84 (0.69, 1.03)     | 2 | Y |
| Keats et al. 2019 <sup>38</sup>   | Micronutrients supplements   | Low birth weight                 | 18 | RR: 0.88 (0.85, 0.91)    | Wolf et al. 2017 <sup>39</sup>           | Multivitamin supplements    | Yes vs. No   | Low birth weight                 | 2  | RR: 0.79 (0.45, 1.41)     | 2 | Y |
| Keats et al. 2019 <sup>38</sup>   | Micronutrients supplements   | Small gestational age            | 17 | RR: 0.92 (0.88, 0.97)    | Wolf et al. 2017 <sup>39</sup>           | Multivitamin supplements    | Yes vs. No   | Small gestational age            | 3  | RR: 0.77 (0.63, 0.93)     | 2 | Y |
| Kelly et al. 2017 <sup>138</sup>  | Whole grain intake           | Systolic blood pressure (mmHg)   | 8  | MD: 0.04 (-1.67, 1.75)   | Schwingshackl et al. 2017 <sup>129</sup> | Whole grain intake          | High vs. Low | Hypertension                     | 4  | RR: 0.86 (0.79, 0.93)     | 3 | N |
| Kelly et al. 2017 <sup>138</sup>  | Whole grain intake           | Diastolic blood pressure (mmHg)  | 8  | MD: 0.16 (-0.89, 1.21)   | Schwingshackl et al. 2017 <sup>129</sup> | Whole grain intake          | High vs. Low | Hypertension                     | 4  | RR: 0.86 (0.79, 0.93)     | 3 | N |
| Kelly et al. 2017 <sup>138</sup>  | Whole grain intake           | Body weight (kg)                 | 5  | MD: -0.41 (-1.04, 0.23)  | Ye et al. 2012 <sup>139</sup>            | Whole grain intake          | High vs. Low | Body weight (kg)                 | 3  | MD: -0.30 (-0.37, -0.24)  | 2 | Y |
| Mathew et al. 2012 <sup>140</sup> | β-carotene supplements       | Cataract                         | 2  | RR: 0.99 (0.91, 1.08)    | Jiang et al. 2019 <sup>141</sup>         | β-carotene intake           | High vs. Low | Cataract                         | 7  | RR: 0.90 (0.83, 0.99)     | 2 | Y |
| Mathew et al. 2012 <sup>140</sup> | Vitamin E supplements        | Cataract                         | 3  | RR: 0.97 (0.91, 1.04)    | Jiang et al. 2019 <sup>141</sup>         | Vitamin E intake            | High vs. Low | Cataract                         | 6  | RR: 0.90 (0.80, 1.00)     | 2 | Y |
| Mathew et al. 2012 <sup>140</sup> | Vitamin C supplements        | Cataract                         | 1  | RR: 1.02 (0.91, 1.14)    | Jiang et al. 2019 <sup>141</sup>         | Vitamin C intake            | High vs. Low | Cataract                         | 7  | RR: 0.80 (0.72, 0.88)     | 2 | Y |
| Palacios et al. 2019 <sup>6</sup> | Vitamin D supplements        | Gestational diabetes             | 5  | RR: 0.54 (0.34, 0.86)    | Hu et al. 2018 <sup>5</sup>              | Vitamin D status            | High vs. Low | Gestational diabetes             | 21 | OR: 0.76 (0.64, 0.90)     | 3 | Y |
| Palacios et al. 2019 <sup>6</sup> | Vitamin D supplements        | Preterm birth                    | 4  | RR: 1.25 (0.92, 1.69)    | Tous et al. 2020 <sup>7</sup>            | Vitamin D status            | High vs. Low | Preterm birth                    | 19 | OR: 0.78 (0.65, 0.93)     | 3 | Y |
| Palacios et al. 2019 <sup>6</sup> | Vitamin D supplements        | Birth length (cm)                | 11 | MD: -0.04 (-0.26, 0.19)  | Tous et al. 2020 <sup>7</sup>            | Vitamin D status            | High vs. Low | Birth length (cm)                | 7  | MD: -0.12 (-0.33, 0.09)   | 3 | Y |
| Palacios et al. 2019 <sup>6</sup> | Vitamin D supplements        | Birth weight (g)                 | 13 | MD: 32.61 (-9.51, 74.72) | Tous et al. 2020 <sup>7</sup>            | Vitamin D status            | High vs. Low | Birth weight (g)                 | 14 | MD: 84.20 (52.59, 115.81) | 3 | Y |
| Palacios et al. 2019 <sup>6</sup> | Vitamin D supplements        | Head circumference at birth (cm) | 10 | MD: 0.08 (-0.09, 0.25)   | Tous et al. 2020 <sup>7</sup>            | Vitamin D status            | High vs. Low | Head circumference at birth (cm) | 7  | MD: 0.47 (-0.16, 1.11)    | 3 | Y |
| Palacios et al. 2019 <sup>6</sup> | Vitamin D supplements        | Pre-eclampsia                    | 5  | RR: 0.96 (0.65, 1.42)    | Yuan et al. 2019 <sup>8</sup>            | Vitamin D status            | High vs. Low | Pre-eclampsia                    | 15 | OR: 0.62 (0.50, 0.78)     | 3 | Y |
| Rees et al. 2013a <sup>40</sup>   | Healthy diet (intake)        | Systolic blood pressure (mmHg)   | 11 | MD: -2.61 (-3.91, -1.31) | Kastorini et al. 2011 <sup>41</sup>      | Mediterranean diet (intake) | High vs. Low | Systolic blood pressure (mmHg)   | 1  | MD: 0.80 (-0.84, 2.44)    | 2 | Y |



## Supplementary data

|                                     |                                     |                                   |    |                          |                                           |                             |                       |                                   |    |                            |   |   |
|-------------------------------------|-------------------------------------|-----------------------------------|----|--------------------------|-------------------------------------------|-----------------------------|-----------------------|-----------------------------------|----|----------------------------|---|---|
| Rees et al. 2013a <sup>40</sup>     | Healthy diet (intake)               | Diastolic blood pressure (mmHg)   | 11 | MD: -1.45 (-2.22, -0.68) | Kastorini et al. 2011 <sup>41</sup>       | Mediterranean diet (intake) | High vs. Low          | Diastolic blood pressure (mmHg)   | 1  | MD: 0.90 (-0.38, 2.18)     | 2 | Y |
| Rees et al. 2013b <sup>42</sup>     | Selenium supplements                | All-cause mortality               | 2  | RR: 0.97 (0.88, 1.08)    | Jayedi et al. 2018 <sup>142</sup>         | Selenium intake             | High vs. Low          | All-cause mortality               | 3  | RR: 0.79 (0.73, 0.85)      | 2 | Y |
| Rees et al. 2013b <sup>42</sup>     | Selenium supplements                | Cardiovascular mortality          | 2  | RR: 0.97 (0.79, 1.20)    | Xiang et al. 2019 <sup>143</sup>          | Selenium status             | High vs. Low          | Cardiovascular mortality          | 3  | RR: 0.77 (0.63, 0.94)      | 3 | Y |
| Rees et al. 2013b <sup>42</sup>     | Selenium supplements                | Combined cardiovascular events    | 2  | RR: 1.03 (0.95, 1.11)    | Zhang et al. 2016a <sup>43</sup>          | Selenium status             | High vs. Low          | Cardiovascular disease            | 14 | RR: 0.87 (0.76, 0.99)      | 3 | Y |
| Rees et al. 2019 <sup>3</sup>       | Mediterranean diet (intake)         | High Density Lipoprotein (mmol/L) | 6  | MD: 0.02 (-0.01, 0.04)   | Kastorini et al. 2011 <sup>41</sup>       | Mediterranean diet (intake) | High vs. Low          | High Density Lipoprotein (mmol/L) | 1  | MD: 0.01 (-0.046, 0.061)   | 2 | Y |
| Rees et al. 2019 <sup>3</sup>       | Mediterranean diet (intake)         | Triglycerides (mmol/L)            | 7  | MD: -0.09 (-0.16, -0.01) | Kastorini et al. 2011 <sup>41</sup>       | Mediterranean diet (intake) | High vs. Low          | Triglycerides (mmol/L)            | 1  | MD: -0.023 (-0.076, 0.031) | 2 | Y |
| Rees et al. 2019 <sup>3</sup>       | Mediterranean diet (intake)         | Systolic blood pressure (mmHg)    | 4  | MD: -1.50 (-3.92, 0.92)  | Kastorini et al. 2011 <sup>41</sup>       | Mediterranean diet (intake) | High vs. Low          | Systolic blood pressure (mmHg)    | 1  | MD: 0.80 (-0.84, 2.44)     | 2 | Y |
| Rees et al. 2019 <sup>3</sup>       | Mediterranean diet (intake)         | Cardiovascular mortality          | 1  | HR: 0.81 (0.50, 1.32)    | Rosato et al. 2019 <sup>44</sup>          | Mediterranean diet (intake) | High vs. Low          | Cardiovascular mortality          | 7  | RR: 0.73 (0.67, 0.81)      | 2 | Y |
| Rees et al. 2019 <sup>3</sup>       | Mediterranean diet (intake)         | Combined cardiovascular events    | 1  | HR: 0.70 (0.58, 0.85)    | Rosato et al. 2019 <sup>44</sup>          | Mediterranean diet (intake) | High vs. Low          | Cardiovascular disease            | 11 | RR: 0.81 (0.74, 0.88)      | 2 | Y |
| Rees et al. 2019 <sup>3</sup>       | Mediterranean diet (intake)         | All-cause mortality               | 1  | HR: 1.00 (0.81, 1.24)    | Soltani et al. 2019 <sup>144</sup>        | Mediterranean diet (intake) | per 2-point increment | All-cause mortality               | 26 | RR: 0.90 (0.89, 0.91)      | 2 | Y |
| Rutjes et al. 2018 <sup>10</sup>    | B-Vitamin supplements               | Dementia / MCI                    | 1  | RR: 1.01 (0.69, 1.48)    | Doets et al. 2013 <sup>145</sup>          | Vitamin B12 intake          | per 1 µg/d            | Dementia                          | 3  | RR: 0.99 (0.99, 1.00)      | 3 | Y |
| Rutjes et al. 2018 <sup>10</sup>    | Vitamin D3 supplements              | Dementia                          | 1  | RR: 1.09 (0.70, 1.71)    | Goodwill et al. 2017 <sup>9</sup>         | Vitamin D status            | High vs. Low          | Dementia / MCI                    | 14 | OR: 0.88 (0.81, 0.95)      | 3 | Y |
| Sydenham et al. 2012 <sup>146</sup> | Omega-3 supplements                 | Mini-Mental State Examination     | 2  | MD: -0.07 (-0.25, 0.10)  | Zhang et al. 2016b <sup>147</sup>         | Omega-3 intake              | per 0.1-g/d increment | Dementia                          | 2  | RR: 0.99 (0.85, 1.12)      | 3 | N |
| Tieu et al. 2017 <sup>12</sup>      | Healthy diet (intake)               | Preterm birth                     | 3  | RR: 0.51 (0.21, 1.25)    | Chia et al. 2019 <sup>11</sup>            | Healthy diet (intake)       | High vs. Low          | Preterm birth                     | 5  | OR: 0.81 (0.69, 0.94)      | 2 | Y |
| Tieu et al. 2017 <sup>12</sup>      | Healthy diet (intake)               | Small gestational age             | 2  | RR: 0.84 (0.49, 1.42)    | Chia et al. 2019 <sup>11</sup>            | Healthy diet (intake)       | High vs. Low          | Small gestational age             | 8  | OR: 0.88 (0.71, 1.08)      | 2 | Y |
| Tieu et al. 2017 <sup>12</sup>      | Healthy diet (intake)               | Birth weight (g)                  | 5  | MD: 5.94 (-51.11, 62.99) | Chia et al. 2019 <sup>11</sup>            | Healthy diet (intake)       | High vs. Low          | Birth weight (g)                  | 12 | MD: -9.61 (-53.12, 33.91)  | 2 | Y |
| Tieu et al. 2017 <sup>12</sup>      | Healthy diet (intake)               | Gestational diabetes              | 5  | RR: 0.60 (0.35, 1.04)    | Mijatovic-Vukas et al. 2018 <sup>13</sup> | Mediterranean diet (intake) | High vs. Low          | Gestational diabetes              | 4  | OR: 0.70 (0.62, 0.80)      | 2 | Y |
| Usinger et al. 2012 <sup>148</sup>  | Fermented milk intake + supplements | Systolic blood pressure (mmHg)    | 15 | MD: -2.45 (-4.30, -0.60) | Soedamah-Muthu et al. 2012 <sup>149</sup> | Fermented milk intake       | per 150 g/d increment | Hypertension                      | 4  | RR: 0.99 (0.94, 1.04)      | 3 | N |
| Usinger et al. 2012 <sup>148</sup>  | Fermented milk intake + supplements | Diastolic blood pressure (mmHg)   | 15 | MD: -0.67 (-1.48, 0.14)  | Soedamah-Muthu et al. 2012 <sup>149</sup> | Fermented milk intake       | per 150 g/d increment | Hypertension                      | 4  | RR: 0.99 (0.94, 1.04)      | 3 | N |

### Supplementary data

|                                   |                      |                    |   |                       |                                   |                      |              |                    |    |                       |   |   |
|-----------------------------------|----------------------|--------------------|---|-----------------------|-----------------------------------|----------------------|--------------|--------------------|----|-----------------------|---|---|
| Vinceti et al. 2018 <sup>14</sup> | Selenium supplements | Cancer             | 5 | RR: 0.99 (0.86, 1.14) | Vinceti et al. 2018 <sup>14</sup> | Selenium status      | High vs. Low | Cancer             | 7  | OR: 0.72 (0.55, 0.93) | 3 | Y |
| Vinceti et al. 2018 <sup>14</sup> | Selenium supplements | Cancer mortality   | 2 | RR: 0.81 (0.49, 1.32) | Vinceti et al. 2018 <sup>14</sup> | Selenium intake      | High vs. Low | Cancer mortality   | 1  | OR: 0.93 (0.83, 1.04) | 2 | Y |
| Vinceti et al. 2018 <sup>14</sup> | Selenium supplements | Colorectal cancer  | 3 | RR: 0.74 (0.41, 1.33) | Vinceti et al. 2018 <sup>14</sup> | Selenium supplements | High vs. Low | Colorectal cancer  | 1  | OR: 0.80 (0.68, 0.94) | 2 | Y |
| Yao et al. 2017 <sup>45</sup>     | Fibre intake         | Colorectal cancer  | 2 | RR: 2.70 (1.07, 6.85) | Aune et al. 2011 <sup>150</sup>   | Fibre intake         | High vs. Low | Colorectal cancer  | 19 | RR: 0.88 (0.82, 0.94) | 2 | Y |
| Yao et al. 2017 <sup>45</sup>     | Fibre intake         | Colorectal adenoma | 5 | RR: 1.04 (0.95, 1.13) | Ben et al. 2014 <sup>46</sup>     | Fibre intake         | High vs. Low | Colorectal adenoma | 4  | RR: 0.92 (0.76, 1.10) | 3 | Y |

d: day; g: gram; HOMA-IR: homeostasis model assessment-insulin resistance; HR: hazard ratio; MCI: mild cognitive impairment; MD: mean difference; N: no; NA: not available; OR: odds ratio; RR: risk ratio; T: tertile; µg: microgram; Y: yes; 95% CI: 95% confidence interval.

Supplementary data

Supplementary Table 6: Reason for exclusion from the statistical analysis.

| Bodies of evidence from RCTs       |                            |                                                                   | Bodies of evidence from cohort studies   |                              |                                                                  | Reason for exclusion                                                                                                                                                 |
|------------------------------------|----------------------------|-------------------------------------------------------------------|------------------------------------------|------------------------------|------------------------------------------------------------------|----------------------------------------------------------------------------------------------------------------------------------------------------------------------|
| Reference                          | Intervention               | Outcome                                                           | Reference                                | Exposure                     | Outcome                                                          |                                                                                                                                                                      |
| Cormick et al. 2015 <sup>121</sup> | Calcium supplements        | SBP (MD)                                                          | Jayedi et al. 2019 <sup>122</sup>        | Calcium intake + supplements | Hypertension (RR)                                                | Impossibility to convert one outcome to the other one                                                                                                                |
| Cormick et al. 2015 <sup>121</sup> | Calcium supplements        | DBP (MD)                                                          | Jayedi et al. 2019 <sup>122</sup>        | Calcium intake + supplements | Hypertension (RR)                                                | Impossibility to convert one outcome to the other one                                                                                                                |
| El Dib et al. 2015 <sup>126</sup>  | Zinc supplements           | HOMA-IR (MD)                                                      | Fernandez-Cao et al. 2019 <sup>127</sup> | Zinc supplements             | T2D (RR)                                                         | Impossibility to convert one outcome to the other one                                                                                                                |
| Hartley et al. 2013 <sup>128</sup> | Fruit & Vegetables intake  | SBP (MD)                                                          | Schwingshackl et al. 2017 <sup>129</sup> | Fruit & Vegetables intake    | Hypertension (RR)                                                | Impossibility to convert one outcome to the other one                                                                                                                |
| Hartley et al. 2013 <sup>128</sup> | Fruit & Vegetables intake  | DBP (MD)                                                          | Schwingshackl et al. 2017 <sup>129</sup> | Fruit & Vegetables intake    | Hypertension (RR)                                                | Impossibility to convert one outcome to the other one                                                                                                                |
| Hartley et al. 2016 <sup>130</sup> | Fibre intake + supplements | SBP (MD)                                                          | Schwingshackl et al. 2017 <sup>129</sup> | Whole grain intake           | Hypertension (RR)                                                | Impossibility to convert one outcome to the other one                                                                                                                |
| Hartley et al. 2016 <sup>130</sup> | Fibre intake + supplements | DBP (MD)                                                          | Schwingshackl et al. 2017 <sup>129</sup> | Whole grain intake           | Hypertension (RR)                                                | Impossibility to convert one outcome to the other one                                                                                                                |
| Hooper et al. 2012 <sup>34</sup>   | Low-fat intake             | Body weight (MD)<br>(the intervention is “dietary fat reduction”) | Sartorius et al. 2018 <sup>135</sup>     | High-carbohydrate intake     | Obesity (RR)<br>(the intervention is “high-carbohydrate intake”) | Impossibility to convert one outcome to the other one (moreover intervention in the RCTs meta-analysis too different from the intervention in the CSs meta-analysis) |
| Hooper et al. 2015a <sup>136</sup> | Low-fat intake             | Body weight (MD)<br>(the intervention is “dietary fat reduction”) | Sartorius et al. 2018 <sup>135</sup>     | High-carbohydrate intake     | Obesity (RR)<br>(the intervention is “high-carbohydrate intake”) | Impossibility to convert one outcome to the other one (moreover intervention in the RCTs meta-analysis too different from the intervention in the CSs meta-analysis) |
| Kelly et al. 2017 <sup>138</sup>   | Whole grain intake         | SBP (MD)                                                          | Schwingshackl et al. 2017 <sup>129</sup> | Whole grain intake           | Hypertension (RR)                                                | Impossibility to convert one outcome to the other one                                                                                                                |
| Kelly et al. 2017 <sup>138</sup>   | Whole grain intake         | DBP (MD)                                                          | Schwingshackl et al. 2017 <sup>129</sup> | Whole grain intake           | Hypertension (RR)                                                | Impossibility to convert one outcome to the other one                                                                                                                |
| Sydenham et al.                    | Omega-3                    | MMSE (MD)                                                         | Zhang et al.                             | Omega-3 intake               | Dementia (RR)                                                    | Impossibility to convert one outcome to                                                                                                                              |

Supplementary data

| 2012 <sup>146</sup>                | supplements                         |          | 2016b <sup>147</sup>                      |                       |                   | the other one                                         |
|------------------------------------|-------------------------------------|----------|-------------------------------------------|-----------------------|-------------------|-------------------------------------------------------|
| Usinger et al. 2012 <sup>148</sup> | Fermented milk intake + supplements | SBP (MD) | Soedamah-Muthu et al. 2012 <sup>149</sup> | Fermented milk intake | Hypertension (RR) | Impossibility to convert one outcome to the other one |
| Usinger et al. 2012 <sup>148</sup> | Fermented milk intake + supplements | DBP (MD) | Soedamah-Muthu et al. 2012 <sup>149</sup> | Fermented milk intake | Hypertension      | Impossibility to convert one outcome to the other one |

DBP: diastolic blood pressure; HOMA-IR: homeostasis model assessment-insulin resistance; MD: mean difference; MMSE: Mini-Mental State Examination; RCTs: randomized controlled trials; RR: risk ratio; SBP: systolic blood pressure; T2D: type 2 diabetes.

## Supplementary data

Supplementary Table 7: Categories of diseases for the description of population.

| Category                                         | Included diseases                                                                                                                                                                                                                                                                                                                                                                                                                                                                                                 |
|--------------------------------------------------|-------------------------------------------------------------------------------------------------------------------------------------------------------------------------------------------------------------------------------------------------------------------------------------------------------------------------------------------------------------------------------------------------------------------------------------------------------------------------------------------------------------------|
| Cancer                                           | Breast cancer, colorectal cancer, skin cancer, stomach cancer                                                                                                                                                                                                                                                                                                                                                                                                                                                     |
| Cardiovascular diseases / chronic heart diseases | Angina, atrial fibrillation, cardiomyopathy, chronic heart failure, congestive heart failure, coronary atherosclerosis, coronary artery disease, coronary heart disease, hypertension, ischaemic heart disease, myocardial infarction, peripheral artery disease, sinoatrial node disease, stroke, ventricular arrhythmia, ventricular fibrillation, ventricular tachycardia, participants with bypass / implanted cardioverter defibrillators or pacemaker or had percutaneous transluminal coronary angioplasty |
| Cognitive symptoms                               | Cognitive impairment with or without dementia (e.g. Alzheimer's disease)                                                                                                                                                                                                                                                                                                                                                                                                                                          |
| Diseases of the digestive system                 | Adenoma, atrophic gastritis, Barrett oesophagus, colorectal tumours (unclear if malignant or benign), Crohn's disease, oesophageal dysplasia, polyp                                                                                                                                                                                                                                                                                                                                                               |
| Diseases of the eye                              | Cataract, macular degeneration, retinitis pigmentosa                                                                                                                                                                                                                                                                                                                                                                                                                                                              |
| Diseases of the genitourinary system             | Haemodialysis patients, oophorectomy                                                                                                                                                                                                                                                                                                                                                                                                                                                                              |
| Diseases of the liver                            | Alcoholic hepatitis, alcoholic liver disease, biliary cirrhosis, Hepatitis C, liver cirrhosis, non-alcoholic steatohepatitis, non-alcoholic fatty liver disease                                                                                                                                                                                                                                                                                                                                                   |
| Diseases of the nervous system                   | Amyotrophic lateral sclerosis, Huntington's disease, multiple sclerosis, Parkinson disease                                                                                                                                                                                                                                                                                                                                                                                                                        |
| Endocrine / nutritional / metabolic diseases     | Diabetes or Prediabetes, dyslipidaemia, hypercholesterolemia, hyperlipidaemia, hypolipoproteinaemia, metabolic syndrome, overweight / obese participants                                                                                                                                                                                                                                                                                                                                                          |
| Musculoskeletal diseases                         | Fractures (general, low-trauma, osteoporotic or compression), Osteoarthritis, rheumatoid arthritis, systemic lupus erythematosus                                                                                                                                                                                                                                                                                                                                                                                  |
| Institutionalised                                | People living in care homes, geriatric care / medical unit, mental health institutes, mental health institute, mental hospital, nursing homes, old age hostel, residential home, Veterans retirement home / Administration Centres                                                                                                                                                                                                                                                                                |

Supplementary data

Supplementary Table 8: Characteristics of included bodies of evidence from randomized controlled trials.

| Reference                             | Intervention (as defined by the authors) | Outcome (as defined by the authors) | Studies, n | Sample size, n | Cases, n | Description of population                                                                                                                                                                                                                                                                                                                                        | Age, mean | Description of intervention                                                                                                                                                                                                                                                | Description of comparator                                                                                                             | Description of outcome        | Study design           | Study length/follow-up (years) |
|---------------------------------------|------------------------------------------|-------------------------------------|------------|----------------|----------|------------------------------------------------------------------------------------------------------------------------------------------------------------------------------------------------------------------------------------------------------------------------------------------------------------------------------------------------------------------|-----------|----------------------------------------------------------------------------------------------------------------------------------------------------------------------------------------------------------------------------------------------------------------------------|---------------------------------------------------------------------------------------------------------------------------------------|-------------------------------|------------------------|--------------------------------|
| Abdelhamid et al. 2018a <sup>15</sup> | Omega-3 intake + supplements             | Cardiovascular mortality            | 25         | 67,772         | 4,544    | People with: history or risk of cardiovascular diseases / chronic heart diseases, cognitive symptoms, risk of diseases of the eye, endocrine / nutritional / metabolic diseases or musculoskeletal diseases                                                                                                                                                      | 53-78     | Dietary advice (0.5g/d EPA) or supplements: EPA (1.8g/d) or EPA + DHA (0.25-1.02g/d EPA + 0.2-0.72g/d DHA or 0.5-3.5g/d EPA + DHA) or total LCn3 (6g/d); supplementary food (1.1-1.5g/d EPA + 1.5-1.8g/d DHA); enriched food (0.4-4.5g/d EPA + DHA)                        | Nil; Placebo / Supplements: MUFA / Omega-6 / MUFA + Omega-6 / SFA + MUFA / CHO + SFA / low EPA + DHA                                  | Cardiovascular mortality      | Parallel and factorial | 1-9                            |
| Abdelhamid et al. 2018a <sup>15</sup> | Omega-3 intake + supplements             | Cardiovascular disease              | 38         | 90,378         | 14,737   | Healthy people; people with: history or risk of cardiovascular diseases / chronic heart diseases, cognitive symptoms, diseases of the digestive system, risk of diseases of the eye, endocrine / nutritional / metabolic diseases, musculoskeletal diseases, diseases of the nervous system, diseases of the liver or cancer risk (breast); postmenopausal women | 38-78     | Dietary advice (0.5g/d EPA or 1.5g/d EPA + DHA); supplements: EPA (1.8-1.9g/d) or EPA + DHA (0.225-2.2g/d EPA + 0.2-1.72g/d DHA) or 0.5-3.5g/d EPA + DHA) or total LCn3 (6g/d); supplementary food (1.1-3.2g/d EPA + 1.5-2.3g/d DHA); enriched food (0.4-4.5g/d EPA + DHA) | Nil; dietary advice; Placebo / Supplements: MUFA / Omega-6 / MUFA + Omega-6 / SFA / SFA + MUFA / CHO + SFA / low EPA + DHA / paraffin | Cardiovascular events         | Parallel and factorial | 1-9                            |
| Abdelhamid et al. 2018a <sup>15</sup> | $\alpha$ -Linolenic acid intake          | Cardiovascular disease              | 5          | 19,327         | 884      | General population; healthy people; people with: endocrine / nutritional / metabolic diseases or risk or history of cardiovascular diseases / chronic heart diseases (peripheral artery disease, myocardial infarction, risk of CVD)                                                                                                                             | 54-69     | Enriched food (1.9-6.3g/d ALA) or supplementary food (5-6.8g/d ALA)                                                                                                                                                                                                        | Nil or placebo: MUFA or Omega-6                                                                                                       | Cardiovascular events         | Parallel and factorial | 1-3                            |
| Abdelhamid et al. 2018a <sup>15</sup> | Omega-3 intake + supplements             | Body weight                         | 12         | 15,812         | NA       | People with: history or risk of cardiovascular diseases / chronic heart diseases, endocrine / nutritional / metabolic diseases, musculoskeletal diseases, diseases of the nervous system, diseases of the liver or people with spinal cord injury                                                                                                                | 40-64     | Supplements: EPA + DHA (0.13-1.84g/d EPA + 0.375-1.8g/d DHA or 0.45-3.36g/d EPA + DHA) or LCn3 (6g/d); dietary advice + supplement (0.42-1.98g/d EPA + 0.21-1.32g/d DHA or 0.63-3.3g/d EPA + DHA); enriched food (4.5g/d EPA + DHA)                                        | Placebo / Supplements: MUFA / Omega-6 / SFA + MUFA / CHO + SFA / low EPA + DHA; dietary advice + placebo                              | Measures of adiposity; weight | Parallel and factorial | 1-6                            |

Supplementary data

|                                       |                                          |                          |    |        |       |                                                                                                                                                                                                                                                                                                          |       |                                                                                                                                                                                                                                                                                                                                                                                     |                                                                                                                                                            |                               |                        |     |
|---------------------------------------|------------------------------------------|--------------------------|----|--------|-------|----------------------------------------------------------------------------------------------------------------------------------------------------------------------------------------------------------------------------------------------------------------------------------------------------------|-------|-------------------------------------------------------------------------------------------------------------------------------------------------------------------------------------------------------------------------------------------------------------------------------------------------------------------------------------------------------------------------------------|------------------------------------------------------------------------------------------------------------------------------------------------------------|-------------------------------|------------------------|-----|
| Abdelhamid et al. 2018a <sup>15</sup> | Omega-3 intake + supplements             | All-cause mortality      | 39 | 92,653 | 8,189 | Healthy people; people with: history or risk of cardiovascular diseases / chronic heart diseases, cognitive symptoms, diseases of the digestive system, history or risk of diseases of the eye, endocrine / nutritional / metabolic diseases, musculoskeletal diseases or diseases of the nervous system | 34-78 | Dietary advice (0.5g/d EPA or 1.4g/d EPA + DHA); supplements: EPA (1.8g/d) or DHA (1-2g/d) or EPA + DHA (0.2-2.2g/d EPA + 0.2-0.84g/d DHA or 0.5-3.5g/d EPA + DHA) or total LCn3 (6g/d); dietary advice and supplements (0.096g/d EPA + 0.36g/d DHA + ALA or 1.71g/d EPA + 1.14g/d DHA); supplementary food (1.1-1.5g/d EPA + 1.5-1.8g/d DHA); enriched food (0.4-4.5g/d EPA + DHA) | Nil; dietary advice; Placebo / Supplements: MUFA / Omega-6 / MUFA + Omega-6 / SFA / SFA + MUFA / CHO + SFA / low EPA + DHA; dietary advice + placebo: MUFA | Mortality                     | Parallel and factorial | 1-9 |
| Abdelhamid et al. 2018a <sup>15</sup> | $\alpha$ -Linolenic acid intake          | Cardiovascular mortality | 4  | 18,619 | 219   | General population; people with: endocrine / nutritional / metabolic diseases or risk or history of cardiovascular diseases / chronic heart diseases (peripheral artery disease, myocardial infarction, risk of CVD)                                                                                     | 54-69 | Enriched food (1.9-6.3g/d ALA) or supplementary food (5.5-6.8g/d ALA)                                                                                                                                                                                                                                                                                                               | Placebo: MUFA or Omega-6                                                                                                                                   | Cardiovascular mortality      | Parallel and factorial | 1-3 |
| Abdelhamid et al. 2018a <sup>15</sup> | $\alpha$ -Linolenic acid intake          | Coronary heart disease   | 4  | 19,061 | 397   | General population; healthy people; people with: endocrine / nutritional / metabolic diseases or cardiovascular diseases / chronic heart diseases (peripheral artery disease, myocardial infarction)                                                                                                     | 65-69 | Enriched food (1.9g/d ALA) or supplementary food (5-6.8g/d ALA)                                                                                                                                                                                                                                                                                                                     | Nil or placebo: MUFA or Omega-6                                                                                                                            | Coronary heart disease events | Parallel               | 1-3 |
| Abdelhamid et al. 2018b <sup>21</sup> | Polyunsaturated fat intake + supplements | All-cause mortality      | 24 | 19,290 | 1,443 | People with: cardiovascular diseases / chronic heart diseases, cancer, diseases of the nervous system, endocrine / nutritional / metabolic diseases, mental disorders or diseases of the digestive system; institutionalised people                                                                      | 32-78 | Dietary advice: TF, PUFA, Omega-6 (-3.3-9.2%/E PUFA); supplements: Omega-6, Omega-3, GLA, EPA, EPA + DHA (0.6-10.4%/E PUFA); dietary advice + supplement: Omega-6, EPA + DHA (1.1-21.9%/E PUFA); provided diet: Omega-6 (7.5-17.7%/E PUFA); enriched food: ALA (1.02-1.3%/E PUFA); supplementary food: EPA + DHA (1.9-2%/E PUFA)                                                    | Nil: SFA, SFA + MUFA; dietary advice: SFA; placebo / supplements: MUFA, MCT                                                                                | Death / all-cause mortality   | Parallel and factorial | 1-8 |

Supplementary data

|                                       |                                          |                             |    |        |       |                                                                                                                                                                                                                                                                                                                        |       |                                                                                                                                                                                                                                                                                            |                                                                                                                                  |                                                                                                                                                                                                                                                               |                                   |     |
|---------------------------------------|------------------------------------------|-----------------------------|----|--------|-------|------------------------------------------------------------------------------------------------------------------------------------------------------------------------------------------------------------------------------------------------------------------------------------------------------------------------|-------|--------------------------------------------------------------------------------------------------------------------------------------------------------------------------------------------------------------------------------------------------------------------------------------------|----------------------------------------------------------------------------------------------------------------------------------|---------------------------------------------------------------------------------------------------------------------------------------------------------------------------------------------------------------------------------------------------------------|-----------------------------------|-----|
| Abdelhamid et al. 2018b <sup>21</sup> | Polyunsaturated fat intake + supplements | Coronary heart disease      | 15 | 10,076 | 1,351 | Healthy people; people with: endocrine / nutritional / metabolic diseases, cardiovascular diseases / chronic heart diseases (MI, ischaemic heart disease, had PTCA, had PCI, CHD, cardioverter defibrillator, ventricular tachycardia, ventricular fibrillation) or musculoskeletal diseases; institutionalised people | 49-71 | Dietary advice: Omega-6 (2.8-6.6%/E PUFA); supplements: EPA, EPA + DHA or Omega-3 (0.6-2.2%/E PUFA); dietary advice + supplement: Omega-6 (20.6-21.9%/E PUFA); provided diet: Omega-6 (12%/E PUFA); enriched food: ALA (1.02-1.3%/E PUFA); supplementary food: EPA + DHA (1.9-2.3%/E PUFA) | Nil: SFA, SFA + MUFA; placebo / supplements: MUFA; dietary advice + supplement: MUFA; provided usual diet                        | Coronary heart disease events: myocardial infarction or angina                                                                                                                                                                                                | Parallel and factorial            | 1-8 |
| Abdelhamid et al. 2018b <sup>21</sup> | Polyunsaturated fat intake               | Major cardiovascular events | 2  | 2,879  | 817   | Institutionalised men (Veterans); men with previous MI                                                                                                                                                                                                                                                                 | 56-66 | Dietary advice: Omega-6 (2.8%/E PUFA); provided diet: Omega-6 (12%/E PUFA)                                                                                                                                                                                                                 | Nil (normal diet): SFA, provided usual diet                                                                                      | Cardiovascular events, coronary heart disease events                                                                                                                                                                                                          | Parallel and factorial            | 2-8 |
| Adler et al. 2014 <sup>23</sup>       | Low-sodium intake                        | All-cause mortality         | 7  | 6,603  | 625   | General population; overweight people; people with: hypertension, diabetes or risk of vascular diseases; institutionalised people (Veterans, old age hostel)                                                                                                                                                           | 39-83 | Regularly dietary advice (sodium reduction to 49-50% or 70-100mmol/d), provided diet (containing 49% sodium), substitution (salt with 65% sodium)                                                                                                                                          | Nil (normal diet: salt with 100% sodium), dietary advice once, provided diet with regular salt (99.6% sodium)                    | Deaths, all-cause mortality, mortality                                                                                                                                                                                                                        | Individual and cluster            | 1-3 |
| Adler et al. 2014 <sup>23</sup>       | Low-sodium intake                        | Cardiovascular mortality    | 3  | 2,656  | 106   | People with: hypertension, diabetes or risk of vascular disease; institutionalised people (Veterans)                                                                                                                                                                                                                   | 57-76 | Regularly dietary advice (sodium reduction to 70-100mmol/d), provided diet (containing 49% sodium), substitution (salt with 65% sodium)                                                                                                                                                    | Nil (normal diet: salt with 100% sodium), provided diet with regular salt (99.6% sodium)                                         | Cardiovascular disease deaths, cardiovascular mortality                                                                                                                                                                                                       | Individual and cluster            | 1-3 |
| Adler et al. 2014 <sup>23</sup>       | Low-sodium intake                        | Cardiovascular events       | 4  | 3,397  | 194   | People with: hypertension, diabetes or risk of vascular disease; institutionalised people (Veterans)                                                                                                                                                                                                                   | 57-76 | Regularly dietary advice (sodium reduction to 70-100mmol/d), provided diet (containing 49% sodium), substitution (salt with 65% sodium)                                                                                                                                                    | Nil (normal diet: salt with 100% sodium), provided diet with regular salt (99.6% sodium), dietary advice without disease context | Fatal and non-fatal myocardial infarction, stroke, angina, heart failure, peripheral vascular events, sudden death, revascularisation (coronary artery bypass surgery or angioplasty with or without stenting) and cardiovascular-related hospital admissions | Individual, factorial and cluster | 1-3 |
| Adler et al. 2014 <sup>23</sup>       | Low-sodium intake                        | Systolic blood pressure     | 6  | 3,362  | NA    | General population; overweight people; people with: hypertension, diabetes or risk of vascular diseases                                                                                                                                                                                                                | 39-66 | Regularly dietary advice (sodium reduction to 50% or 70-100mmol/d), substitution (salt with 65% sodium)                                                                                                                                                                                    | Nil (normal diet: salt with 100% sodium), dietary advice without disease context                                                 | Blood pressure                                                                                                                                                                                                                                                | Individual and factorial          | 1-3 |



### Supplementary data

|                                       |                        |                             |    |         |        |                                                                                                                                                                                                                                                                                                                                                                     |       |                                                                                                                                                                                                            |                                                                             |                                                                            |                                    |        |
|---------------------------------------|------------------------|-----------------------------|----|---------|--------|---------------------------------------------------------------------------------------------------------------------------------------------------------------------------------------------------------------------------------------------------------------------------------------------------------------------------------------------------------------------|-------|------------------------------------------------------------------------------------------------------------------------------------------------------------------------------------------------------------|-----------------------------------------------------------------------------|----------------------------------------------------------------------------|------------------------------------|--------|
| Adler et al. 2014 <sup>23</sup>       | Low-sodium intake      | Diastolic blood pressure    | 5  | 2,754   | NA     | General population; overweight people; people with hypertension                                                                                                                                                                                                                                                                                                     | 39-66 | Regularly dietary advice (sodium reduction to 50% or 70-100mmol/d)                                                                                                                                         | Nil (normal diet), dietary advice without disease context                   | Blood pressure                                                             | Individual and factorial           | 2-3    |
| Al-Khudairy et al. 2017 <sup>1</sup>  | Vitamin C supplements  | Major cardiovascular events | 1  | 14,641  | NA     | Men aged 50+                                                                                                                                                                                                                                                                                                                                                        | 50+   | Supplements: Vitamin C (500mg)                                                                                                                                                                             | Placebo                                                                     | Major cardiovascular event                                                 | Parallel / factorial               | 8      |
| Al-Khudairy et al. 2017 <sup>1</sup>  | Vitamin C supplements  | Cardiovascular mortality    | 1  | 14,641  | NA     | Men aged 50+                                                                                                                                                                                                                                                                                                                                                        | 50+   | Supplements: Vitamin C (500mg)                                                                                                                                                                             | Placebo                                                                     | Cardiovascular death                                                       | Parallel / factorial               | 8      |
| Al-Khudairy et al. 2017 <sup>1</sup>  | Vitamin C supplements  | All-cause mortality         | 1  | 14,641  | NA     | Men aged 50+                                                                                                                                                                                                                                                                                                                                                        | 50+   | Supplements: Vitamin C (500mg)                                                                                                                                                                             | Placebo                                                                     | All-cause mortality                                                        | Parallel / factorial               | 8      |
| Avenell et al. 2014 <sup>27</sup>     | Vitamin D supplements  | Hip fracture                | 10 | 26,549  | 670    | Mostly general population; mostly postmenopausal women, older men; people with: history of hip fracture or osteoporotic fracture; institutionalised people (nursing homes)                                                                                                                                                                                          | 76-85 | Supplements orally: Cholecalciferol, Vitamin D3 (146,000-500,000IU/year) or Ergocalciferol, Vitamin D2 (300,000-401,500IU/year) or i.m. injection Vitamin D2 (300,000IU/year)                              | Placebo (orally and i.m. injection), nil                                    | Hip fractures                                                              | Mostly NA, 1 cluster               | 1-5    |
| Avenell et al. 2014 <sup>27</sup>     | Vitamin D supplements  | Any fracture                | 14 | 27,127  | 2,326  | Mostly general population; mostly postmenopausal women, older men; people with: history of hip fracture or osteoporotic fracture, endocrine / nutritional / metabolic diseases or cardiovascular diseases / chronic heart diseases; institutionalised people (nursing homes)                                                                                        | 57-85 | Supplements orally: Cholecalciferol, Vitamin D3 (146,000-730,000IU/year), Ergocalciferol, Vitamin D2 (300,000-480,000IU/year) or Calcifediol (21,900IU/year) or i.m. injection Vitamin D2 (300,000IU/year) | Placebo (orally and i.m. injection), nil                                    | Any fractures, non-vertebral fractures, hip fractures, vertebral fractures | Mostly NA, 1 factorial, 1 cluster  | 0.3-5  |
| Bjelakovic et al. 2012 <sup>117</sup> | β-carotene supplements | All-cause mortality         | 31 | 195,503 | 23,182 | Healthy people; people with: risk or history of cancer, diseases of the eye, risk or history of cardiovascular diseases / chronic heart diseases, endocrine / nutritional / metabolic diseases, diseases of the liver or diseases of the digestive system; smokers; institutionalised people; elderly people / people with age-related diseases; general population | 42-85 | Supplements: β-carotene (2.4-50mg or 15,000IU β-carotene) individually or combined with other antioxidants, multivitamins, multi-minerals, trace elements, medications                                     | Placebo, placebo + calcium and magnesium, placebo + low Vitamin C (20-50mg) | All-cause mortality, overall mortality, total mortality                    | Parallel, factorial and cross-over | 0.4-13 |

Supplementary data

|                                       |                       |                     |    |         |        |                                                                                                                                                                                                                                                                                                                                                                                                                                                                                                          |       |                                                                                                                                                                                                                                                                                                                                                                                      |                                                                                          |                                                         |                                    |        |
|---------------------------------------|-----------------------|---------------------|----|---------|--------|----------------------------------------------------------------------------------------------------------------------------------------------------------------------------------------------------------------------------------------------------------------------------------------------------------------------------------------------------------------------------------------------------------------------------------------------------------------------------------------------------------|-------|--------------------------------------------------------------------------------------------------------------------------------------------------------------------------------------------------------------------------------------------------------------------------------------------------------------------------------------------------------------------------------------|------------------------------------------------------------------------------------------|---------------------------------------------------------|------------------------------------|--------|
| Bjelakovic et al. 2012 <sup>117</sup> | Vitamin E supplements | All-cause mortality | 64 | 211,957 | 22,058 | Healthy people; people with: cognitive symptoms, risk of cancer, diseases of the eye, risk or history of cardiovascular diseases / chronic heart diseases, endocrine / nutritional / metabolic diseases, diseases of the liver, diseases of the digestive system, musculoskeletal diseases, diseases of the nervous system or diseases of the genitourinary system; smokers; institutionalised people; elderly people / people with age-related diseases; general population; postmenopausal women       | 37-85 | Supplements: Vitamin E, (dl/d-) $\alpha$ -tocopherol, RRR- $\alpha$ -tocopheryl acetate, (dl/d-)- $\alpha$ -tocopheryl acetate, all-rac-( $\alpha$ -)tocopheryl acetate, d- $\alpha$ -tocopheryl succinate (0.01-5g or 10-2,000IU, natural or synthetic) individually or combined with other antioxidants, multivitamins, multi-minerals, trace elements, micronutrient, medications | Nil, placebo, placebo + calcium and magnesium, placebo + medication, low Vitamin E (3mg) | All-cause mortality, overall mortality, total mortality | Parallel, factorial and cross-over | 0.1-13 |
| Bjelakovic et al. 2012 <sup>117</sup> | Vitamin C supplements | All-cause mortality | 41 | 90,191  | 8,020  | Healthy people; people with: cognitive symptoms, risk of cancer, diseases of the eye, risk or history of cardiovascular diseases / chronic heart diseases, endocrine / nutritional / metabolic diseases, diseases of the liver, diseases of the digestive system, musculoskeletal diseases, diseases of the genitourinary system or pressure ulcers; smokers; institutionalised people; medical in-patients; elderly people / people with age-related diseases; general population; postmenopausal women | 37-85 | Supplements: Vitamin C, ascorbic acid, calcium ascorbate-Ester C R, active / synthetic Vitamin C, active / synthetic ascorbic acid, slow-release Vitamin C (60-3,000mg/d) individually or combined with other antioxidants, multivitamins, multi-minerals, trace elements, micronutrient, medications                                                                                | Placebo, placebo + calcium and magnesium, placebo + Vitamin C                            | All-cause mortality, overall mortality, total mortality | Parallel, factorial and cross-over | 0.1-9  |

## Supplementary data

|                                        |                       |                          |    |        |        |                                                                                                                                                                                                                                                                                                                                                                                                                                                      |                      |                                                                                                                                                                                                                                                                                                                                                             |                                                                |                                        |                        |        |
|----------------------------------------|-----------------------|--------------------------|----|--------|--------|------------------------------------------------------------------------------------------------------------------------------------------------------------------------------------------------------------------------------------------------------------------------------------------------------------------------------------------------------------------------------------------------------------------------------------------------------|----------------------|-------------------------------------------------------------------------------------------------------------------------------------------------------------------------------------------------------------------------------------------------------------------------------------------------------------------------------------------------------------|----------------------------------------------------------------|----------------------------------------|------------------------|--------|
| Bjelakovic et al. 2012 <sup>117</sup>  | Vitamin A supplements | All-cause mortality      | 18 | 61,190 | 7,215  | Healthy people; people with: risk or history of cancer, diseases of the eye, cardiovascular diseases / chronic heart diseases, endocrine / nutritional / metabolic diseases or diseases of the digestive system; institutionalised people; medical in-patients; elderly people / people with age-related diseases; general population                                                                                                                | 54-85                | Supplements: Vitamin A, retinol, retinol equivalent, Vitamin A acetate (0.4-800mg/d or 1,333-200,000IU or 800 retinol equivalents), individually or combined with other antioxidants, multivitamins, multi-minerals, trace elements, micronutrient, medications                                                                                             | Placebo, placebo + calcium and magnesium                       | All-cause mortality, overall mortality | Parallel and factorial | 0.1-10 |
| Bjelakovic et al. 2014a <sup>118</sup> | Vitamin D supplements | All-cause mortality      | 56 | 95,286 | 11,998 | Mostly women; healthy people; people with: risk or history of musculoskeletal diseases, diseases of the eye, diseases of the nervous system, cardiovascular diseases / chronic heart diseases or low serum Vitamin D levels or Vitamin D insufficiency; elderly people / people with age-related diseases; postmenopausal women; general population; institutionalised people; medical in-patients; bedridden people; people with history of falling | 51-89 (range 18-107) | Supplements orally: Vitamin D3 (100-100,000IU/d), Vitamin D2 (143-9,000IU/d), $\alpha$ -calcidol (1 $\mu$ g), calcitriol (0.25-2 $\mu$ g), cholecalciferol (150,000IU/3m) or i.m. injection D2 (300.000IU/y) or enriched food D3 (800IU/d), individually or combined with calcium, Vitamin K1, multivitamins, medications, exercise, home safety assessment | Placebo, placebo + calcium, calcium, nil, information material | All-cause mortality                    | Parallel and factorial | 0.1-7  |
| Bjelakovic et al. 2014a <sup>118</sup> | Vitamin D supplements | Cardiovascular mortality | 10 | 47,267 | 1,957  | Mostly women; healthy people; people with: risk or history of musculoskeletal diseases (mostly fractures) or Vitamin D insufficiency; elderly people / people with age-related diseases; postmenopausal women                                                                                                                                                                                                                                        | 52-80                | Supplements orally: Vitamin D3 (300-100,000IU/d), individually or combined with calcium, Vitamin K1                                                                                                                                                                                                                                                         | Placebo, nil                                                   | Cardiovascular mortality               | Parallel and factorial | 0.3-7  |
| Bjelakovic et al. 2014a <sup>118</sup> | Vitamin D supplements | Cancer mortality         | 4  | 44,492 | 1,192  | Mostly women; healthy people; people with musculoskeletal diseases (osteoporotic fracture); elderly people / people with age-related diseases; postmenopausal women                                                                                                                                                                                                                                                                                  | 53-77                | Supplements orally: Vitamin D3 (100-833IU/d), individually or combined with calcium, medications                                                                                                                                                                                                                                                            | Placebo                                                        | Cancer mortality                       | Parallel and factorial | 5-7    |

Supplementary data

|                                       |                        |                          |    |        |       |                                                                                                                                                                                                                                                                                                    |                     |                                                                                                                                                                                                                                   |                                           |                          |                                             |       |
|---------------------------------------|------------------------|--------------------------|----|--------|-------|----------------------------------------------------------------------------------------------------------------------------------------------------------------------------------------------------------------------------------------------------------------------------------------------------|---------------------|-----------------------------------------------------------------------------------------------------------------------------------------------------------------------------------------------------------------------------------|-------------------------------------------|--------------------------|---------------------------------------------|-------|
| Bjelakovic et al. 2014b <sup>29</sup> | Vitamin D supplements  | Cancer occurrence        | 18 | 50,623 | 3,870 | Mostly women; healthy people; people with: risk or history of musculoskeletal diseases (fractures) or cardiovascular diseases / chronic heart diseases (hypertension); elderly people / people with age-related diseases; postmenopausal women; general population; people with history of falling | 47-79 (range 50-97) | Supplements: Vitamin D3 (100-6,666IU/d), Vitamin D2 (1,000IU/d), calcitriol (0.25-2µg), cholecalciferol (3,000IU/d or 150,000IU/3m) or enriched food D3 (800IU/d), individually or combined with calcium, Vitamin K1, medications | Placebo, placebo + calcium, nil           | Cancer occurrence        | Parallel and factorial                      | 0.4-7 |
| Bjelakovic et al. 2014b <sup>29</sup> | Vitamin D3 supplements | Breast cancer            | 7  | 43,669 | 1,135 | Mostly women; healthy people; people with musculoskeletal diseases (fractures) or cardiovascular diseases / chronic heart diseases (hypertension); elderly people / people with age-related diseases; postmenopausal women                                                                         | 47-77               | Supplements: Vitamin D3 (400-6,666IU/d), cholecalciferol (3,000IU/d), individually or combined with calcium                                                                                                                       | Placebo                                   | Breast cancer occurrence | Parallel and factorial                      | 0.4-7 |
| Bjelakovic et al. 2014b <sup>29</sup> | Vitamin D3 supplements | Lung cancer              | 5  | 45,509 | 329   | Mobile before developing a low-trauma fracture, geriatric women, healthy postmenopausal women                                                                                                                                                                                                      | 55-77               | Supplements: Vitamin D3                                                                                                                                                                                                           | Placebo                                   | Lung cancer              | Parallel and factorial                      | 0.5-7 |
| Cormick et al. 2015 <sup>121</sup>    | Calcium supplements    | Systolic blood pressure  | 16 | 3,048  | NA    | Healthy people; general population; postmenopausal women; people with: endocrine / nutritional / metabolic diseases (overweight) or cardiovascular diseases / chronic heart diseases (hypertension)                                                                                                | 24-74 (range 14-74) | Supplements: Calcium (as calcium carbonate, calcium lactate gluconate, calcium citrate) (0.5-2g/d) or calcium powder in juice (0.6-1.5g/d) or high-calcium powder milk                                                            | Placebo                                   | Systolic blood pressure  | Parallel and cross-over (NA in 12 studies!) | 0.1-4 |
| Cormick et al. 2015 <sup>121</sup>    | Calcium supplements    | Diastolic blood pressure | 15 | 2,947  | NA    | Healthy people; general population; postmenopausal women; people with: endocrine / nutritional / metabolic diseases (overweight) or cardiovascular diseases / chronic heart diseases (hypertension)                                                                                                | 24-74 (range 14-74) | Supplements: Calcium (as calcium carbonate, calcium lactate gluconate, calcium citrate) (0.5-2g/d) or calcium powder in juice (1.5g/d) or high-calcium powder milk                                                                | Placebo                                   | Diastolic blood pressure | Parallel and cross-over (NA in 11 studies!) | 0.1-4 |
| De-Regil et al. 2015 <sup>123</sup>   | Folate supplements     | Neural tube defect       | 5  | 6,708  | 54    | Pregnant women, previously pregnant but plan to have another pregnancy, history of giving birth child with neural tube defects                                                                                                                                                                     | <35                 | Supplements: folic acid (6,000IU/d, 360-4,000ug/d)                                                                                                                                                                                | Multivitamin supplement, control, placebo | Neural tube defect       | Parallel and factorial                      | NA    |

### Supplementary data

|                                       |                            |                                     |    |        |       |                                                                                                                                                                    |                              |                                                                                                                            |                                      |                                                              |                        |                                                                 |
|---------------------------------------|----------------------------|-------------------------------------|----|--------|-------|--------------------------------------------------------------------------------------------------------------------------------------------------------------------|------------------------------|----------------------------------------------------------------------------------------------------------------------------|--------------------------------------|--------------------------------------------------------------|------------------------|-----------------------------------------------------------------|
| De-Regil et al. 2015 <sup>123</sup>   | Folate supplements         | Congenital cardiovascular anomalies | 3  | 5,612  | 22    | Pregnant women, previously pregnant but plan to have another pregnancy                                                                                             | <35                          | Supplements: folic acid (6,000IU/d, 360-4,000ug/d)                                                                         | Multivitamin supplement, control     | Congenital cardiovascular anomalies                          | Parallel and factorial | NA                                                              |
| El Dib et al. 2015 <sup>126</sup>     | Zinc supplements           | HOMA-IR                             | 1  | 56     | NA    | People with obesity                                                                                                                                                | 25-45                        | Supplements: Zinc                                                                                                          | Placebo                              | HOMA-IR                                                      | Parallel               | 0.1                                                             |
| Hartley et al. 2013 <sup>128</sup>    | Fruit & Vegetables intake  | Systolic blood pressure             | 2  | 891    | NA    | Healthy people, people with colorectal adenomas                                                                                                                    | 46-59                        | Increase fruit and vegetable consumption                                                                                   | Usual diet                           | Systolic blood pressure                                      | Parallel               | 0.5-1                                                           |
| Hartley et al. 2013 <sup>128</sup>    | Fruit & Vegetables intake  | Diastolic blood pressure            | 2  | 891    | NA    | Healthy people, people with colorectal adenomas                                                                                                                    | 46-59                        | Increase fruit and vegetable consumption                                                                                   | Usual diet                           | Diastolic blood pressure                                     | Parallel               | 0.5-1                                                           |
| Hartley et al. 2016 <sup>130</sup>    | Fibre intake + supplements | Systolic blood pressure             | 8  | 661    | NA    | Healthy people; postmenopausal women; people with: endocrine / nutritional / metabolic diseases or cardiovascular diseases / chronic heart diseases (hypertension) | 34-58 (range 19-65)          | Supplements: soluble fibre (7-27.5g/d), individually or with dietary advice; or provided supplementary foods high in fibre | Placebo, nil, dietary advice         | Systolic blood pressure                                      | Parallel               | 0.2-0.5                                                         |
| Hartley et al. 2016 <sup>130</sup>    | Fibre intake + supplements | Diastolic blood pressure            | 8  | 661    | NA    | Healthy people; postmenopausal women; people with: endocrine / nutritional / metabolic diseases or cardiovascular diseases / chronic heart diseases (hypertension) | 34-58 (range 19-65)          | Supplements: soluble fibre (7-27.5g/d), individually or with dietary advice; or provided supplementary foods high in fibre | Placebo, nil, dietary advice         | Diastolic blood pressure                                     | Parallel               | 0.2-0.5                                                         |
| Hemmingsen et al. 2017 <sup>131</sup> | Healthy diet (intake)      | Type 2 diabetes                     | 1  | NA     | NA    | People with impaired glucose tolerance                                                                                                                             | NA                           | Healthy diet                                                                                                               | Usual diet                           | Type 2 diabetes                                              | Cluster                | 17                                                              |
| Hemmingsen et al. 2017 <sup>131</sup> | Healthy diet (intake)      | All-cause mortality                 | 1  | NA     | NA    | People with impaired glucose tolerance                                                                                                                             | NA                           | Healthy diet                                                                                                               | Usual diet                           | All-cause-mortality                                          | Cluster                | 17                                                              |
| Hofmeyr et al. 2018 <sup>32</sup>     | Calcium supplements        | Pre-eclampsia                       | 13 | 15,730 | 889   | Pregnant women (nulliparous and primiparous); healthy; risk of gestational hypertension or pre-eclampsia (2x)                                                      | mostly NA; <17-30 (3studies) | Supplements: Calcium (elemental; calcium carbonate; calcium gluconate) (1.5-2g/d)                                          | Placebo, placebo + prenatal vitamins | Pre-eclampsia                                                | NA                     | NA (during pregnancy, from 34 weeks of pregnancy at the latest) |
| Hofmeyr et al. 2018 <sup>32</sup>     | Calcium supplements        | High blood pressure                 | 12 | 15,470 | 2,732 | Pregnant women (nulliparous and primiparous); healthy; risk of gestational hypertension or pre-eclampsia (2x)                                                      | mostly NA; <17-30 (3studies) | Supplements: Calcium (elemental; calcium carbonate; calcium gluconate) (1.5-2g/d)                                          | Placebo, placebo + prenatal vitamins | High blood pressure in pregnancy with or without proteinuria | NA                     | NA (during pregnancy, from 34 weeks of pregnancy at the latest) |

Supplementary data

|                                  |                                               |                                |    |        |       |                                                                                                                                                                                                                              |                     |                                                                                                                                                                                                                                                                                                                                                                                                             |                                                                                                                               |                                                                                                                                                                                                                                                                                                |                    |                            |
|----------------------------------|-----------------------------------------------|--------------------------------|----|--------|-------|------------------------------------------------------------------------------------------------------------------------------------------------------------------------------------------------------------------------------|---------------------|-------------------------------------------------------------------------------------------------------------------------------------------------------------------------------------------------------------------------------------------------------------------------------------------------------------------------------------------------------------------------------------------------------------|-------------------------------------------------------------------------------------------------------------------------------|------------------------------------------------------------------------------------------------------------------------------------------------------------------------------------------------------------------------------------------------------------------------------------------------|--------------------|----------------------------|
| Hooper et al. 2012 <sup>34</sup> | Low-fat / modified fat (intake + supplements) | Cardiovascular mortality       | 14 | 65,978 | 1,407 | People with: history or risk of cardiovascular diseases / chronic heart diseases, cancer or endocrine / nutritional / metabolic diseases; institutionalised people; postmenopausal women                                     | 49-70 (range 30-70) | Modified fat (provided food: 40-45%/E total fat, 18-20%/E PUFA; dietary advice + supplementary food: 35g total fat); reduced fat (dietary advice: 15-20%/E or 40g total fat or dietary advice + supplements: 30%/E total fat); reduced and modified fat (dietary advice: 27-30%/E total fat, 8-10%/E SFA, 8%/E PUFA)                                                                                        | Nil, provided usual diet, dietary advice, information material, usual diet + supplements                                      | Cardiovascular mortality                                                                                                                                                                                                                                                                       | NA, factorial (1x) | 1-11 (mean years in trial) |
| Hooper et al. 2012 <sup>34</sup> | Low-fat / modified fat (intake + supplements) | All-cause mortality            | 20 | 71,790 | 4,292 | People with: history or risk of cardiovascular diseases / chronic heart diseases, cancer, diseases of the digestive system or endocrine / nutritional / metabolic diseases; institutionalised people; postmenopausal women   | 45-70 (range 20-73) | Modified fat (provided food: 30-45%/E total fat, 15-20%/E PUFA, <9%/E SFA; dietary advice: 10%/E SFA, 15%/E PUFA; dietary advice + supplementary food: 35g total fat); reduced fat (dietary advice: 15-25%/E or 40g total fat or dietary advice + supplements: 30%/E total fat); reduced and modified fat (dietary advice: 27-30%/E total fat, 8-10%/E SFA, 8%/E PUFA)                                      | Nil, provided usual diet, dietary advice, information material, usual diet + supplements                                      | All-cause mortality                                                                                                                                                                                                                                                                            | NA, factorial (1x) | 1-11 (mean years in trial) |
| Hooper et al. 2012 <sup>34</sup> | Low-fat / modified fat (intake + supplements) | Combined cardiovascular events | 18 | 65,508 | 4,887 | Healthy people; general population; people with: history or risk of cardiovascular diseases / chronic heart diseases, cancer or endocrine / nutritional / metabolic diseases; institutionalised people; postmenopausal women | 46-70 (range 30-70) | Modified fat (dietary advice: 40%/E total fat; provided food: 40-45%/E total fat, 18-20%/E PUFA; dietary advice + supplementary food: 35g total fat); reduced fat (dietary advice: 20-25%/E or 40g total fat or dietary advice + supplements: 30%/E total fat); reduced and modified fat (dietary advice: 27-30%/E total fat, 8-10%/E SFA, 8%/E PUFA; dietary advice + supplementary food: 30%/E total fat) | Nil, provided usual diet, dietary advice, information material, usual diet + supplements, dietary advice + supplementary food | Combined cardiovascular events (=cardiovascular deaths, cardiovascular morbidity (non-fatal myocardial infarction, angina, stroke, heart failure, peripheral vascular events, atrial fibrillation) and unplanned cardiovascular interventions (coronary artery bypass surgery or angioplasty)) | NA, factorial (1x) | 1-8 (mean years in trial)  |

### Supplementary data

|                                    |                          |                          |    |        |       |                                                                                                                                                                                                                                      |                     |                                                                                                                                                                       |                                                                                           |                                                                                                               |                    |                              |
|------------------------------------|--------------------------|--------------------------|----|--------|-------|--------------------------------------------------------------------------------------------------------------------------------------------------------------------------------------------------------------------------------------|---------------------|-----------------------------------------------------------------------------------------------------------------------------------------------------------------------|-------------------------------------------------------------------------------------------|---------------------------------------------------------------------------------------------------------------|--------------------|------------------------------|
| Hooper et al. 2012 <sup>34</sup>   | Low-fat intake           | Body weight              | 16 | 11,058 | NA    | Healthy people; people with: cardiovascular diseases / chronic heart diseases, risk or history of cancer, diseases of the digestive system or endocrine / nutritional / metabolic diseases; postmenopausal women                     | 27-62 (range 20-73) | Reduced fat (dietary advice: 15-25%/E total fat or provided food: 20-30%/E total fat                                                                                  | Nil, usual provided diet (trial shop), dietary advice, information material               | Weight                                                                                                        | NA                 | 0.4-11 (mean years in trial) |
| Hooper et al. 2015a <sup>136</sup> | Low-fat intake           | Body weight              | 25 | 53,647 | NA    | Healthy people; general population; people with: cardiovascular diseases / chronic heart diseases, risk or history of cancer, diseases of the digestive system or endocrine / nutritional / metabolic diseases; postmenopausal women | 33-62 (range 20-79) | Reduced fat (dietary advice: 15-30%/E total fat, 7-10%/E SFA, 15-20%/E MUFA; provided food); reduced and modified fat (dietary advice: 30%/E total fat, 16-18%/E SFA) | Nil, usual provided diet (study shop), dietary advice, modified fat, information material | Weight                                                                                                        | NA, factorial (1x) | 0.4-11 (mean years in trial) |
| Hooper et al. 2015b <sup>35</sup>  | Low saturated fat intake | All-cause mortality      | 11 | 55,858 | 3,276 | People with: cardiovascular diseases / chronic heart diseases, cancer or endocrine / nutritional / metabolic diseases; institutionalised people; postmenopausal women                                                                | 49-66               | Reduced a/o modified fat: 6.4-11%/E SFA; replaced by PUFA a/o CHO a/o protein                                                                                         | Nil, dietary advice, usual provided diet, information material                            | All-cause mortality, death from any cause                                                                     | NA, factorial (1x) | 2-8 (mean years in trial)    |
| Hooper et al. 2015b <sup>35</sup>  | Low saturated fat intake | Cardiovascular mortality | 10 | 53,421 | 1,096 | People with: cardiovascular diseases / chronic heart diseases, cancer or endocrine / nutritional / metabolic diseases; institutionalised people; postmenopausal women                                                                | 49-66               | Reduced a/o modified fat: 6.6-11%/E SFA; replaced by PUFA a/o CHO a/o protein                                                                                         | Nil, dietary advice, usual provided diet, information material                            | Cardiovascular (cardiovascular disease) mortality (deaths from myocardial infarction, stroke or sudden death) | NA, factorial (1x) | 2-8 (mean years in trial)    |

Supplementary data

|                                  |                              |                                |    |        |       |                                                                                                                                                                                          |       |                                                                                                                                                                                                                                                                                                                                             |                                                                               |                                                                                                                                                                                                                                                                                                       |                    |                           |
|----------------------------------|------------------------------|--------------------------------|----|--------|-------|------------------------------------------------------------------------------------------------------------------------------------------------------------------------------------------|-------|---------------------------------------------------------------------------------------------------------------------------------------------------------------------------------------------------------------------------------------------------------------------------------------------------------------------------------------------|-------------------------------------------------------------------------------|-------------------------------------------------------------------------------------------------------------------------------------------------------------------------------------------------------------------------------------------------------------------------------------------------------|--------------------|---------------------------|
| Hooper et al. 2015 <sup>35</sup> | Low saturated fat intake     | Combined cardiovascular events | 11 | 53,300 | 4,377 | People with: risk or history of cardiovascular diseases / chronic heart diseases, cancer or endocrine / nutritional / metabolic diseases; institutionalised people; postmenopausal women | 46-66 | Reduced a/o modified fat: 6.6-11.5%/E SFA; replaced by PUFA a/o CHO a/o protein                                                                                                                                                                                                                                                             | Nil, dietary advice, usual provided diet, information material                | Combined cardiovascular disease events (cardiovascular deaths, cardiovascular morbidity (non-fatal myocardial infarction, angina, stroke, heart failure, peripheral vascular events, atrial fibrillation) and unplanned cardiovascular interventions (coronary artery bypass surgery or angioplasty)) | NA, factorial (1x) | 2-8 (mean years in trial) |
| Hooper et al. 2018 <sup>37</sup> | Omega-6 intake + supplements | Combined cardiovascular events | 7  | 4,962  | 1,404 | People with: cardiovascular diseases / chronic heart diseases or endocrine / nutritional / metabolic diseases (diabetes); institutionalised people; general population                   | 45-66 | Supplements (0.48g GLA, 4%/E n-6), provided diet (40%/E total fat, 12-15%/E PUFA, 8.2-12.2%/E n-6), dietary advice (30%/E total fat, 15%/E PUFA), dietary advice + supplement (35g total fat, 18.9%/E LA), dietary advice + supplementary food (28.8%/E LA)                                                                                 | Nil, provided usual diet, placebo, supplementary food (MUFA)                  | Cardiovascular disease events (fatal and non-fatal myocardial infarction, angina, stroke)                                                                                                                                                                                                             | Parallel           | 1-8 (mean years in trial) |
| Hooper et al. 2018 <sup>37</sup> | Omega-6 intake + supplements | All-cause mortality            | 10 | 4,506  | 979   | People with: cancer, cardiovascular diseases / chronic heart diseases or diseases of the nervous system; institutionalised people                                                        | 32-66 | Supplements (GLA or GLA +LA: 0.5-2.92g GLA, 0.34g LA), provided diet (30-40%/E total fat, 12-15%/E PUFA), dietary advice (20-30%/E total fat, 15%/E PUFA), enriched food (10.4%/E n-6 or 23g LA), supplementary food (15%/E n-6), dietary advice + supplement (35g total fat, 18.9%/E LA), dietary advice + supplementary food (28.8%/E LA) | Nil, provided usual diet, placebo, supplementary food (MUFA, SFA, oleic acid) | All-cause mortality                                                                                                                                                                                                                                                                                   | Parallel           | 1-8 (mean years in trial) |



### Supplementary data

|                                  |                              |                          |    |        |     |                                                                                                                                                            |                             |                                                                                                                                                                                                                   |                                                     |                                                     |                                          |                           |
|----------------------------------|------------------------------|--------------------------|----|--------|-----|------------------------------------------------------------------------------------------------------------------------------------------------------------|-----------------------------|-------------------------------------------------------------------------------------------------------------------------------------------------------------------------------------------------------------------|-----------------------------------------------------|-----------------------------------------------------|------------------------------------------|---------------------------|
| Hooper et al. 2018 <sup>37</sup> | Omega-6 intake + supplements | Cardiovascular mortality | 7  | 4,019  | 472 | People with: cancer, cardiovascular diseases / chronic heart diseases or endocrine / nutritional / metabolic diseases (diabetes); institutionalised people | 49-66                       | Provided diet (40%/E total fat, 12%/E PUFA), dietary advice (20-40%/E total fat, 15%/E PUFA, 13%/E LA), dietary advice + supplement (35g total fat, 18.9%/E LA), dietary advice + supplementary food (28.8%/E LA) | Nil, provided usual diet, supplementary food (MUFA) | Cardiovascular disease mortality                    | Parallel                                 | 2-8 (mean years in trial) |
| Jin et al. 2012 <sup>137</sup>   | Total flavonoids intake      | Colorectal adenoma       | 1  | 929    | 358 | People >35 years within 150% of recommended weight, with colorectal adenoma identified in six months before study entry                                    | 61                          | Intake: decrease fat by 30%, increase fibre intake by 75%, and increase 0.12servings/MJ of fruit and vegetable intake                                                                                             | Diet as usual                                       | Adenoma recurrence                                  | Parallel                                 | 4                         |
| Jin et al. 2012 <sup>137</sup>   | Isoflavonoes intake          | Colorectal adenoma       | 1  | 929    | 353 | People >35 years within 150% of recommended weight, with colorectal adenoma identified in six months before study entry                                    | 61                          | Intake: decrease fat by 30%, increase fibre intake by 75%, and increase 0.12servings/MJ of fruit and vegetable intake                                                                                             | Diet as usual                                       | Adenoma recurrence                                  | Parallel                                 | 4                         |
| Jin et al. 2012 <sup>137</sup>   | Flavonols intake             | Colorectal adenoma       | 1  | 929    | 363 | People >35 years within 150% of recommended weight, with colorectal adenoma identified in six months before study entry                                    | 61                          | Intake: decrease fat by 30%, increase fibre intake by 75%, and increase 0.12servings/MJ of fruit and vegetable intake                                                                                             | Diet as usual                                       | Adenoma recurrence                                  | Parallel                                 | 4                         |
| Keats et al. 2019 <sup>38</sup>  | Micronutrients supplements   | Preterm birth            | 18 | 91,425 | NA  | Pregnant women, women with amenorrhoea                                                                                                                     | 12-45 (NA in most studies!) | Supplements: Multiple-micronutrient with iron and folic acid                                                                                                                                                      | Placebo, iron with or without folic acid            | Preterm birth (births before 37 weeks of gestation) | Cluster and factorial (NA in 10 studies) | 1-5                       |
| Keats et al. 2019 <sup>38</sup>  | Micronutrients supplements   | Low birth weight         | 18 | 68,801 | NA  | Pregnant women, women with amenorrhoea                                                                                                                     | 12-45 (NA in most studies!) | Supplements: Multiple-micronutrient with iron and folic acid                                                                                                                                                      | Placebo, iron with or without folic acid            | Low birthweight (birthweight less than 2,500g)      | Cluster and factorial (NA in 10 studies) | 1-5                       |
| Keats et al. 2019 <sup>38</sup>  | Micronutrients supplements   | Small gestational age    | 17 | 57,348 | NA  | Pregnant women, women with amenorrhoea                                                                                                                     | 12-45 (NA in most studies!) | Supplements: Multiple-micronutrient with iron and folic acid                                                                                                                                                      | Placebo, iron with or without folic acid            | Small-for-gestational age                           | Cluster and factorial (NA in 10 studies) | 1-5                       |
| Kelly et al. 2017 <sup>138</sup> | Whole grain intake           | Systolic blood pressure  | 8  | 768    | NA  | Healthy people; people endocrine / nutritional / metabolic diseases                                                                                        | 40-70                       | Whole grain intake                                                                                                                                                                                                | Refined grains                                      | Systolic blood pressure                             | Parallel                                 | 0.2-0.3                   |
| Kelly et al. 2017 <sup>138</sup> | Whole grain intake           | Diastolic blood pressure | 8  | 768    | NA  | Healthy people; people endocrine / nutritional / metabolic diseases                                                                                        | 40-70                       | Whole grain intake                                                                                                                                                                                                | Refined grains                                      | Diastolic blood pressure                            | Parallel                                 | 0.2-0.3                   |
| Kelly et al. 2017 <sup>138</sup> | Whole grain intake           | Body weight              | 5  | 439    | NA  | Healthy people; people endocrine / nutritional / metabolic diseases                                                                                        | 40-70                       | Whole grain intake                                                                                                                                                                                                | Refined grains                                      | Body weight                                         | Parallel                                 | 0.2                       |

### Supplementary data

|                                   |                        |                             |    |        |     |                                                                                           |             |                                                                                                                                                                                                                                  |                                                           |                             |                             |         |
|-----------------------------------|------------------------|-----------------------------|----|--------|-----|-------------------------------------------------------------------------------------------|-------------|----------------------------------------------------------------------------------------------------------------------------------------------------------------------------------------------------------------------------------|-----------------------------------------------------------|-----------------------------|-----------------------------|---------|
| Mathew et al. 2012 <sup>40</sup>  | β-carotene supplements | Cataract                    | 2  | 61,947 | NA  | General healthy men and women                                                             | 53          | Supplements: β-carotene (50mg on alternate days)                                                                                                                                                                                 | Placebo                                                   | Cataract                    | Factorial                   | 2.7-12  |
| Mathew et al. 2012 <sup>40</sup>  | Vitamin E supplements  | Cataract                    | 3  | 55,721 | NA  | General healthy men and women, prior cataract surgery                                     | 53-66       | Supplements: Vitamin E (400IU on alternate days; 500IU/d in soybean oil)                                                                                                                                                         | Placebo                                                   | Cataract                    | Parallel and factorial      | 4-8     |
| Mathew et al. 2012 <sup>40</sup>  | Vitamin C supplements  | Cataract                    | 1  | 14,641 | NA  | General healthy men                                                                       | 62          | Supplements: Vitamin C (500mg/d)                                                                                                                                                                                                 | Placebo                                                   | Cataract                    | Factorial                   | 8       |
| Palacios et al. 2019 <sup>6</sup> | Vitamin D supplements  | Gestational diabetes        | 5  | 1,846  | 77  | Pregnant women                                                                            | 18-40 range | Supplements: Vitamin D (4,200-50,000IU oral D3/week; 2,000IU/d)                                                                                                                                                                  | Placebo, Vitamin D, multivitamin                          | Gestational diabetes        | Parallel                    | 0.2-0.5 |
| Palacios et al. 2019 <sup>6</sup> | Vitamin D supplements  | Preterm birth               | 4  | 2,294  | 189 | Pregnant women                                                                            | 18-40 range | Supplements: Vitamin D (50,000IU every two weeks, 28,000IU/w, 5,000IU/d)                                                                                                                                                         | Placebo, Vitamin D                                        | Preterm birth               | Parallel                    | 0.2-0.5 |
| Palacios et al. 2019 <sup>6</sup> | Vitamin D supplements  | Birth length                | 11 | 3,058  | NA  | Pregnant women, women with risk of pre-eclampsia, mother or father with history of asthma | 16-40 range | Supplements: Vitamin D (4,200-28,000IU/w or 4,000-4,400IU/d or 50,000U/w) or cholecalciferol (60,000U/4 or 8w) or Vitamin D3 (3,600IU/d or 52,800IU/w or 300,000 twice during pregnancy) or Vitamin D + Vitamin D3 (3,800 IU/d)  | Placebo, Vitamin D / D3 low or once, Vitamin D3 + placebo | Birth length                | Parallel (NA in 10 studies) | 0.3-7   |
| Palacios et al. 2019 <sup>6</sup> | Vitamin D supplements  | Birth weight                | 13 | 3,240  | NA  | Pregnant women, women with risk of pre-eclampsia, mother or father with history of asthma | 16-42 range | Supplements: Vitamin D (4,200-28,000IU/w or 4,000-4,400IU/d or 50,000U/w) or cholecalciferol (60,000U/4 or 8w) or Vitamin D3 (2,000IU/d or 52,800IU/w or 300,000IU twice during pregnancy) or Vitamin D + Vitamin D3 (3,800IU/d) | Placebo, Vitamin D / D3 low or once, Vitamin D3 + placebo | Birth weight                | Parallel (NA in 12 studies) | 0.3-7   |
| Palacios et al. 2019 <sup>6</sup> | Vitamin D supplements  | Head circumference at birth | 10 | 2,998  | NA  | Pregnant women, women with risk of pre-eclampsia, mother or father with history of asthma | 16-40 range | Supplements: Vitamin D (4,200-28,000IU/w or 4,000-4,400IU/d or 50,000 U/w) or Vitamin D3 (3,600IU/d or 52,800IU/w or 300,000IU twice during pregnancy) or Vitamin D + Vitamin D3 (3,800IU/d)                                     | Placebo, Vitamin D / D3 low or once, Vitamin D3 + placebo | Head circumference at birth | NA                          | 0.3-7   |
| Palacios et al. 2019 <sup>6</sup> | Vitamin D supplements  | Pre-eclampsia               | 5  | 1,553  | 96  | Pregnant women                                                                            | 18-40       | Supplements: Vitamin D (50,000IU every two weeks, 2,000-4,000 IU/d)                                                                                                                                                              | Placebo, Vitamin D                                        | Pre-eclampsia               | Parallel                    | 0.2-0.5 |

## Supplementary data

|                                 |                             |                                |    |        |       |                                                                                                                                                                                                     |                     |                                                                                                                                             |                                                                                                                                                                                                                                                   |                                      |                                                    |        |
|---------------------------------|-----------------------------|--------------------------------|----|--------|-------|-----------------------------------------------------------------------------------------------------------------------------------------------------------------------------------------------------|---------------------|---------------------------------------------------------------------------------------------------------------------------------------------|---------------------------------------------------------------------------------------------------------------------------------------------------------------------------------------------------------------------------------------------------|--------------------------------------|----------------------------------------------------|--------|
| Rees et al. 2013a <sup>40</sup> | Healthy diet (intake)       | Systolic blood pressure        | 11 | 6,406  | NA    | General population; healthy people; people with: risk or history of cardiovascular diseases / chronic heart diseases or endocrine / nutritional / metabolic diseases                                | 44-56 (range 18-69) | Dietary advice (increase fruits & vegetables, reduce salt [with or without general health education], healthy lifestyle prompts, DASH diet) | Nil, dietary advice (not personalized, less frequently, general information)                                                                                                                                                                      | Systolic blood pressure              | Parallel, factorial, cross-over, multi-centre      | 0.2-3  |
| Rees et al. 2013a <sup>40</sup> | Healthy diet (intake)       | Diastolic blood pressure       | 11 | 6,406  | NA    | General population; healthy people; people with: risk or history of cardiovascular diseases / chronic heart diseases or endocrine / nutritional / metabolic diseases                                | 44-56 (range 18-69) | Dietary advice (increase fruits & vegetables, reduce salt [with or without general health education], healthy lifestyle prompts, DASH diet) | Nil, dietary advice (not personalized, less frequently, general information)                                                                                                                                                                      | Diastolic blood pressure             | Parallel, factorial, cross-over, multi-centre      | 0.2-3  |
| Rees et al. 2013b <sup>42</sup> | Selenium supplements        | All-cause mortality            | 2  | 18,452 | 1,336 | People with history of non-melanoma skin cancer, generally healthy                                                                                                                                  | >50                 | Supplements: Selenium supplied as selenium yeast or selenomethionine (200µg/d)                                                              | Placebo                                                                                                                                                                                                                                           | All-cause mortality                  | Parallel                                           | 7.6-12 |
| Rees et al. 2013b <sup>42</sup> | Selenium supplements        | Cardiovascular mortality       | 2  | 18,452 | 342   | People with history of non-melanoma skin cancer, generally healthy                                                                                                                                  | >50                 | Supplements: Selenium supplied as selenium yeast or selenomethionine (200µg/d)                                                              | Placebo                                                                                                                                                                                                                                           | Cardiovascular mortality             | Parallel                                           | 7.6-12 |
| Rees et al. 2013b <sup>42</sup> | Selenium supplements        | Combined cardiovascular events | 2  | 18,452 | 2,329 | People with history of non-melanoma skin cancer, generally healthy                                                                                                                                  | >50                 | Supplements: Selenium supplied as selenium yeast or selenomethionine (200µg/d)                                                              | Placebo                                                                                                                                                                                                                                           | Combined cardiovascular events       | Parallel                                           | 7.6-12 |
| Rees et al. 2019 <sup>3</sup>   | Mediterranean diet (intake) | High Density Lipoprotein       | 6  | 891    | NA    | Healthy; people with: cancer (breast), endocrine / nutritional / metabolic diseases or moderate or high risk for cardiovascular diseases / chronic heart diseases; postmenopausal women             | 50-67               | Mediterranean diet: dietary advice (mostly menu plans), twice supplemented with olive oil (or nuts)                                         | Hypolipidaemic diet, Central European diet, low-fat diet, American Cancer Society Guidelines on Nutrition and Physical Activity for Cancer Prevention diet, lacto-ovo-vegetarian diet, American Heart Association-type diet                       | High Density Lipoprotein-Cholesterol | Parallel and cross-over                            | 0.2-5  |
| Rees et al. 2019 <sup>3</sup>   | Mediterranean diet (intake) | Triglycerides                  | 7  | 939    | NA    | Healthy people; people with: cancer (breast), endocrine / nutritional / metabolic diseases, moderate or high risk for cardiovascular diseases / chronic heart diseases or HIV; postmenopausal women | 50-67               | Mediterranean diet: dietary advice (mostly menu plans), twice supplemented with olive oil (or nuts)                                         | Hypolipidaemic diet, Central European diet, low-fat diet, American Cancer Society Guidelines on Nutrition and Physical Activity for Cancer Prevention diet, lacto-ovo-vegetarian diet, American Heart Association-type diet, low-cholesterol diet | Triglycerides                        | Parallel and cross-over (1 parallel = pilot study) | 0.2-5  |
| Rees et al. 2019 <sup>3</sup>   | Mediterranean diet (intake) | Systolic blood pressure        | 4  | 448    | NA    | People with endocrine / nutritional / metabolic diseases or HIV                                                                                                                                     | 55-61               | Mediterranean dietary pattern                                                                                                               | Usual diet, low-fat diet                                                                                                                                                                                                                          | Systolic blood pressure              | Parallel                                           | 0.3-1  |

## Supplementary data

|                                     |                                     |                                |    |       |     |                                                                                                                |             |                                                                                                                                                                                   |                                                                       |                                |                               |         |
|-------------------------------------|-------------------------------------|--------------------------------|----|-------|-----|----------------------------------------------------------------------------------------------------------------|-------------|-----------------------------------------------------------------------------------------------------------------------------------------------------------------------------------|-----------------------------------------------------------------------|--------------------------------|-------------------------------|---------|
| Rees et al. 2019 <sup>3</sup>       | Mediterranean diet (intake)         | Cardiovascular mortality       | 1  | 7,447 | NA  | People with high risk of CVD                                                                                   | 55-80       | Mediterranean diet supplemented with extra virgin olive oil (1l/w, or supplemented with nuts 30g/d)                                                                               | Low-fat diet                                                          | Cardiovascular mortality       | Parallel                      | 4.8     |
| Rees et al. 2019 <sup>3</sup>       | Mediterranean diet (intake)         | Combined cardiovascular events | 1  | 7,447 | NA  | People with high risk of CVD                                                                                   | 55-80       | Mediterranean diet supplemented with extra virgin olive oil (1l/w, or supplemented with nuts 30g/d)                                                                               | Low-fat diet                                                          | Combined cardiovascular events | Parallel                      | 4.8     |
| Rees et al. 2019 <sup>3</sup>       | Mediterranean diet (intake)         | All-cause mortality            | 1  | 7,447 | NA  | People with high risk of CVD                                                                                   | 55-80       | Mediterranean diet supplemented with extra virgin olive oil (1l/w, or supplemented with nuts 30g/d)                                                                               | Low-fat diet                                                          | All-cause mortality            | Parallel                      | 4.8     |
| Rutjes et al. 2018 <sup>10</sup>    | B-Vitamin supplements               | Dementia / MCI                 | 1  | 1,803 | 99  | People with recent stroke or TIA                                                                               | 64          | Supplements (folic acid 2mg/d, B6 25mg, B12 500ug)                                                                                                                                | Placebo                                                               | Dementia / MCI                 | Parallel                      | 2-5     |
| Rutjes et al. 2018 <sup>10</sup>    | Vitamin D3 supplements              | Dementia                       | 1  | 4,143 | 76  | People >65 without probable dementia or cognitive impairment                                                   | 71          | Supplements: Vitamin D3 (400IU/d and 1,000mg/d calcium)                                                                                                                           | Placebo                                                               | Dementia                       | Parallel                      | 7.8     |
| Sydenham et al. 2012 <sup>146</sup> | Omega-3 supplements                 | Mini-Mental State Examination  | 2  | 3,321 | NA  | Cognitively healthy people                                                                                     | 60-80       | Supplements: (400mg/d DHA + EPA; 500mg/d DHA + 200mg/d EPA)                                                                                                                       | Olive oil Placebo, placebo                                            | Mini-Mental State Examination  | Parallel and factorial        | 2-3.5   |
| Tieu et al. 2017 <sup>12</sup>      | Healthy diet (intake)               | Preterm birth                  | 3  | 1,149 | 21  | Women <17 weeks, 12-18 weeks gestation, obese, secunda gravidad if first infant weighted >4,000g               | >18         | Dietary counselling                                                                                                                                                               | Usual care                                                            | Preterm birth                  | Parallel                      | <1      |
| Tieu et al. 2017 <sup>12</sup>      | Healthy diet (intake)               | Small gestational age          | 2  | 715   | 51  | Women 12-20 weeks gestation and at high risk of gestational diabetes mellitus                                  | >18         | Low glycaemic index diet                                                                                                                                                          | Moderate glycaemic index diet                                         | Small gestational age          | Parallel                      | <1      |
| Tieu et al. 2017 <sup>12</sup>      | Healthy diet (intake)               | Birth weight                   | 5  | 1,324 | NA  | Women <17 weeks, 12-18 weeks gestation, overweight or obese, secunda gravidad if first infant weighted >4,000g | >18         | Dietary counselling                                                                                                                                                               | Usual care                                                            | Birth weight                   | Parallel                      | <1      |
| Tieu et al. 2017 <sup>12</sup>      | Healthy diet (intake)               | Gestational diabetes           | 5  | 1,279 | 135 | Women <17 weeks, 12-18 weeks gestation, overweight or obese, secunda gravidad if first infant weighted >4,000g | >18         | Dietary counselling                                                                                                                                                               | Usual care                                                            | Gestational diabetes           | Parallel                      | <1      |
| Usinger et al. 2012 <sup>148</sup>  | Fermented milk intake + supplements | Systolic blood pressure        | 15 | 1,232 | NA  | Healthy people; people with and without hypertension                                                           | 20-81 range | Fermented milk, enriched food (juice or yogurt enriched with LTP or VPP + IPP), supplements: Casein hydrolysis of A. Oryzae protease (1.8-3.6mg/d), fermented milk with added LTP | placebo, normal food (not enriched), fermented milk without added LTP | Systolic blood pressure        | Cross-over (NA in 11 studies) | 0.1-0.4 |

## Supplementary data

|                                    |                                     |                          |    |        |       |                                                                                                                                                               |             |                                                                                                                                                                                          |                                                                       |                                          |                               |         |
|------------------------------------|-------------------------------------|--------------------------|----|--------|-------|---------------------------------------------------------------------------------------------------------------------------------------------------------------|-------------|------------------------------------------------------------------------------------------------------------------------------------------------------------------------------------------|-----------------------------------------------------------------------|------------------------------------------|-------------------------------|---------|
| Usinger et al. 2012 <sup>148</sup> | Fermented milk intake + supplements | Diastolic blood pressure | 15 | 1,232  | NA    | Healthy people; people with and without hypertension                                                                                                          | 20-81 range | Fermented milk, enriched food (juice or yogurt enriched with LTP or VPP + IPP), supplements: Casein hydrolysis of <i>A. Oryzae</i> protease (1.8-3.6mg/d), fermented milk with added LTP | placebo, normal food (not enriched), fermented milk without added LTP | Diastolic blood pressure                 | Cross-over (NA in 11 studies) | 0.1-0.4 |
| Vinceti et al. 2018 <sup>14</sup>  | Selenium supplements                | Cancer                   | 5  | 21,860 | 2,332 | Healthy people; people with: high risk for prostate cancer, completely resected stage I non-small-cell lung cancer, BRCA1+ mutation or history of skin cancer | 62-66       | Supplements: Selenium supplied as selenium yeast or sodium selenite or selenomethionine (200 - 400µg/d)                                                                                  | Placebo                                                               | Any cancer, lung cancer, prostate cancer | Parallel                      | 3-13    |
| Vinceti et al. 2018 <sup>14</sup>  | Selenium supplements                | Cancer mortality         | 2  | 18,698 | 359   | Healthy people; people with history of skin cancer                                                                                                            | 62-63       | Supplements: Selenium supplied as selenium yeast or selenomethionine (200µg/d)                                                                                                           | Placebo                                                               | Any cancer mortality                     | Parallel                      | 8-13    |
| Vinceti et al. 2018 <sup>14</sup>  | Selenium supplements                | Colorectal cancer        | 3  | 20,259 | 159   | Healthy people; people with: history of skin cancer or completely resected stage I non-small-cell lung cancer                                                 | 62-66       | Supplements: Selenium supplied as selenium yeast or selenomethionine (200µg/d)                                                                                                           | Placebo                                                               | Colorectal cancer                        | Parallel                      | 8-13    |
| Yao et al. 2017 <sup>45</sup>      | Fibre intake                        | Colorectal cancer        | 2  | 2,794  | 23    | People with >1 colonic adenomas removed                                                                                                                       | 61-66       | High-fibre, low-fat diet                                                                                                                                                                 | Low-fibre, usual diet                                                 | Colorectal cancer                        | Parallel                      | 2.8-4   |
| Yao et al. 2017 <sup>45</sup>      | Fibre intake                        | Colorectal adenoma       | 5  | 3,641  | 1,297 | People with >1 colonic adenomas removed, 1->2 adenoma                                                                                                         | 53-68       | High-fibre, low-fat diet                                                                                                                                                                 | Low-fibre, usual diet, placebo                                        | Colorectal adenoma                       | Parallel and factorial        | 2.8-4   |

a/o: and / or; ALA:  $\alpha$ -Linolenic acid; *A. Oryzae*: *Aspergillus oryzae*; BRCA1+: breast cancer type 1 susceptibility protein; CHD: coronary heart disease; CHO: carbohydrate; CVD: cardiovascular disease; d: day; DASH: Dietary Approaches to Stop Hypertension; DHA: docosahexaenoic acid; E: energy; EPA: eicosapentaenoic acid; HIV: human immunodeficiency virus; HOMA-IR: homeostasis model assessment-insulin resistance; IPP: Isoleucine-Proline-Proline; g: gram; GLA:  $\gamma$ -linolenic acid; i.m.: intramuscular; IU: international unit; l: litre; LA: linoleic acid; LCn3: long-chain omega-3; LTP: lactotripeptides; m: month; MCI: mild cognitive impairment; MCT: medium-chain triglycerides; mg: milligram; MI: myocardial infarction; MJ: megajoule; mmol: millimole; MUFA: monounsaturated fatty acid; NA: not applicable/assessed; n-6: omega-6; PCI: percutaneous coronary intervention; PTCA: percutaneous transluminal coronary angioplasty; PUFA: polyunsaturated fatty acid; RCT: randomized controlled trial; SFA: saturated fatty acid; TIA: Transient ischemic attack; TF: total fat; VPP: Valine-Proline-Proline; w: week; y: year,  $\mu$ g: microgram.

## Supplementary data

Supplementary Table 9: Certainty of evidence of the included bodies of evidence from randomized controlled trials.

| Reference                              | Intervention<br>(as defined by the authors) | Outcome<br>(as defined by the authors) | Studies, n | Sample size, n | Cases, n | Certainty of evidence |
|----------------------------------------|---------------------------------------------|----------------------------------------|------------|----------------|----------|-----------------------|
| Abdelhamid et al. 2018a <sup>15</sup>  | Omega-3 intake + supplements                | Cardiovascular mortality               | 25         | 67,772         | 4,544    | Moderate              |
| Abdelhamid et al. 2018a <sup>15</sup>  | Omega-3 intake + supplements                | Cardiovascular disease                 | 38         | 90,378         | 14,737   | High                  |
| Abdelhamid et al. 2018a <sup>15</sup>  | $\alpha$ -Linolenic acid intake             | Cardiovascular disease                 | 5          | 19,327         | 884      | Low                   |
| Abdelhamid et al. 2018a <sup>15</sup>  | Omega-3 intake + supplements                | Body weight                            | 12         | 15,812         | NA       | High                  |
| Abdelhamid et al. 2018a <sup>15</sup>  | Omega-3 intake + supplements                | All-cause mortality                    | 39         | 92,653         | 8,189    | High                  |
| Abdelhamid et al. 2018a <sup>15</sup>  | $\alpha$ -Linolenic acid intake             | Cardiovascular mortality               | 4          | 18,619         | 219      | Moderate              |
| Abdelhamid et al. 2018a <sup>15</sup>  | $\alpha$ -Linolenic acid intake             | Coronary heart disease                 | 4          | 19,061         | 397      | Low                   |
| Abdelhamid et al. 2018b <sup>21</sup>  | Polyunsaturated fat intake + supplements    | All-cause mortality                    | 24         | 19,290         | 1,443    | Moderate              |
| Abdelhamid et al. 2018b <sup>21</sup>  | Polyunsaturated fat intake + supplements    | Coronary heart disease                 | 15         | 10,076         | 1,351    | Moderate              |
| Abdelhamid et al. 2018b <sup>21</sup>  | Polyunsaturated fat intake                  | Major cardiovascular events            | 2          | 2,879          | 817      | Very low              |
| Adler et al. 2014 <sup>23</sup>        | Low-sodium intake                           | All-cause mortality                    | 7          | 6,603          | 625      | NA                    |
| Adler et al. 2014 <sup>23</sup>        | Low-sodium intake                           | Cardiovascular mortality               | 3          | 2,656          | 106      | NA                    |
| Adler et al. 2014 <sup>23</sup>        | Low-sodium intake                           | Cardiovascular events                  | 4          | 3,397          | 194      | NA                    |
| Adler et al. 2014 <sup>23</sup>        | Low-sodium intake                           | Systolic blood pressure                | 6          | 3,362          | NA       | NA                    |
| Adler et al. 2014 <sup>23</sup>        | Low-sodium intake                           | Diastolic blood pressure               | 5          | 2,754          | NA       | NA                    |
| Al-Khudairy et al. 2017 <sup>1</sup>   | Vitamin C supplements                       | Major cardiovascular events            | 1          | 14,641         | NA       | Low                   |
| Al-Khudairy et al. 2017 <sup>1</sup>   | Vitamin C supplements                       | Cardiovascular mortality               | 1          | 14,641         | NA       | Very low              |
| Al-Khudairy et al. 2017 <sup>1</sup>   | Vitamin C supplements                       | All-cause mortality                    | 1          | 14,641         | NA       | Very low              |
| Avenell et al. 2014 <sup>27</sup>      | Vitamin D supplements                       | Hip fracture                           | 10         | 26,549         | 670      | NA                    |
| Avenell et al. 2014 <sup>27</sup>      | Vitamin D supplements                       | Any fracture                           | 14         | 27,127         | 2,326    | NA                    |
| Bjelakovic et al. 2012 <sup>117</sup>  | $\beta$ -carotene supplements               | All-cause mortality                    | 31         | 195,503        | 23,182   | NA                    |
| Bjelakovic et al. 2012 <sup>117</sup>  | Vitamin E supplements                       | All-cause mortality                    | 64         | 211,957        | 22,058   | NA                    |
| Bjelakovic et al. 2012 <sup>117</sup>  | Vitamin C supplements                       | All-cause mortality                    | 41         | 90,191         | 8,020    | NA                    |
| Bjelakovic et al. 2012 <sup>117</sup>  | Vitamin A supplements                       | All-cause mortality                    | 18         | 61,190         | 7,215    | NA                    |
| Bjelakovic et al. 2014a <sup>118</sup> | Vitamin D supplements                       | All-cause mortality                    | 56         | 95,286         | 11,998   | NA                    |

## Supplementary data

|                                        |                                               |                                     |    |        |       |          |
|----------------------------------------|-----------------------------------------------|-------------------------------------|----|--------|-------|----------|
| Bjelakovic et al. 2014a <sup>118</sup> | Vitamin D supplements                         | Cardiovascular mortality            | 10 | 47,267 | 1,957 | Low      |
| Bjelakovic et al. 2014a <sup>118</sup> | Vitamin D supplements                         | Cancer mortality                    | 4  | 44,492 | 1,192 | Moderate |
| Bjelakovic et al. 2014b <sup>29</sup>  | Vitamin D supplements                         | Cancer occurrence                   | 18 | 50,623 | 3,870 | Moderate |
| Bjelakovic et al. 2014b <sup>29</sup>  | Vitamin D3 supplements                        | Breast cancer                       | 7  | 43,669 | 1,135 | NA       |
| Bjelakovic et al. 2014b <sup>29</sup>  | Vitamin D3 supplements                        | Lung cancer                         | 5  | 45,509 | 329   | NA       |
| Cormick et al. 2015 <sup>121</sup>     | Calcium supplements                           | Systolic blood pressure             | 16 | 3,048  | NA    | High     |
| Cormick et al. 2015 <sup>121</sup>     | Calcium supplements                           | Diastolic blood pressure            | 15 | 2,947  | NA    | High     |
| De-Regil et al. 2015 <sup>123</sup>    | Folate supplements                            | Neural tube defect                  | 5  | 6,708  | 54    | High     |
| De-Regil et al. 2015 <sup>123</sup>    | Folate supplements                            | Congenital cardiovascular anomalies | 3  | 5,612  | 22    | Low      |
| El Dib et al. 2015 <sup>126</sup>      | Zinc supplements                              | HOMA-IR                             | 1  | 56     | NA    | NA       |
| Hartley et al. 2013 <sup>128</sup>     | Fruit & Vegetables intake                     | Systolic blood pressure             | 2  | 891    | NA    | NA       |
| Hartley et al. 2013 <sup>128</sup>     | Fruit & Vegetables intake                     | Diastolic blood pressure            | 2  | 891    | NA    | NA       |
| Hartley et al. 2016 <sup>130</sup>     | Fibre intake + supplements                    | Systolic blood pressure             | 8  | 661    | NA    | NA       |
| Hartley et al. 2016 <sup>130</sup>     | Fibre intake + supplements                    | Diastolic blood pressure            | 8  | 661    | NA    | NA       |
| Hemmingsen et al. 2017 <sup>131</sup>  | Healthy diet (intake)                         | Type 2 diabetes                     | 1  | NA     | NA    | NA       |
| Hemmingsen et al. 2017 <sup>131</sup>  | Healthy diet (intake)                         | All-cause mortality                 | 1  | NA     | NA    | NA       |
| Hofmeyr et al. 2018 <sup>32</sup>      | Calcium supplements                           | Pre-eclampsia                       | 13 | 15,730 | 889   | Low      |
| Hofmeyr et al. 2018 <sup>32</sup>      | Calcium supplements                           | High blood pressure                 | 12 | 15,470 | 2,732 | NA       |
| Hooper et al. 2012 <sup>34</sup>       | Low-fat / modified fat (intake + supplements) | Cardiovascular mortality            | 14 | 65,978 | 1,407 | High     |
| Hooper et al. 2012 <sup>34</sup>       | Low-fat / modified fat (intake + supplements) | All-cause mortality                 | 20 | 71,790 | 4,292 | High     |
| Hooper et al. 2012 <sup>34</sup>       | Low-fat / modified fat (intake + supplements) | Combined cardiovascular events      | 18 | 65,508 | 4,887 | Moderate |
| Hooper et al. 2012 <sup>34</sup>       | Low-fat intake                                | Body weight                         | 16 | 11,058 | NA    | NA       |
| Hooper et al. 2015a <sup>136</sup>     | Low-fat intake                                | Body weight                         | 25 | 53,647 | NA    | High     |
| Hooper et al. 2015b <sup>35</sup>      | Low saturated fat intake                      | All-cause mortality                 | 11 | 55,858 | 3,276 | Moderate |
| Hooper et al. 2015b <sup>35</sup>      | Low saturated fat intake                      | Cardiovascular mortality            | 10 | 53,421 | 1,096 | Moderate |
| Hooper et al. 2015b <sup>35</sup>      | Low saturated fat intake                      | Combined cardiovascular events      | 11 | 53,300 | 4,377 | Moderate |
| Hooper et al. 2018 <sup>37</sup>       | Omega-6 intake + supplements                  | Combined cardiovascular events      | 7  | 4,962  | 1,404 | Low      |

## Supplementary data

|                                   |                               |                                |    |        |       |          |
|-----------------------------------|-------------------------------|--------------------------------|----|--------|-------|----------|
| Hooper et al. 2018 <sup>37</sup>  | Omega-6 intake + supplements  | All-cause mortality            | 10 | 4,506  | 979   | Low      |
| Hooper et al. 2018 <sup>37</sup>  | Omega-6 intake + supplements  | Cardiovascular mortality       | 7  | 4,019  | 472   | Very low |
| Jin et al. 2012 <sup>137</sup>    | Total flavonoids intake       | Colorectal adenoma             | 1  | 929    | 358   | NA       |
| Jin et al. 2012 <sup>137</sup>    | Isoflavonoes intake           | Colorectal adenoma             | 1  | 929    | 353   | NA       |
| Jin et al. 2012 <sup>137</sup>    | Flavonols intake              | Colorectal adenoma             | 1  | 929    | 363   | NA       |
| Keats et al. 2019 <sup>38</sup>   | Micronutrients supplements    | Preterm birth                  | 18 | 91,425 | NA    | Moderate |
| Keats et al. 2019 <sup>38</sup>   | Micronutrients supplements    | Low birth weight               | 18 | 68,801 | NA    | High     |
| Keats et al. 2019 <sup>38</sup>   | Micronutrients supplements    | Small gestational age          | 17 | 57,348 | NA    | Moderate |
| Kelly et al. 2017 <sup>138</sup>  | Whole grain intake            | Systolic blood pressure        | 8  | 768    | NA    | NA       |
| Kelly et al. 2017 <sup>138</sup>  | Whole grain intake            | Diastolic blood pressure       | 8  | 768    | NA    | NA       |
| Kelly et al. 2017 <sup>138</sup>  | Whole grain intake            | Body weight                    | 5  | 439    | NA    | NA       |
| Mathew et al. 2012 <sup>140</sup> | $\beta$ -carotene supplements | Cataract                       | 2  | 61,947 | NA    | NA       |
| Mathew et al. 2012 <sup>140</sup> | Vitamin E supplements         | Cataract                       | 3  | 55,721 | NA    | NA       |
| Mathew et al. 2012 <sup>140</sup> | Vitamin C supplements         | Cataract                       | 1  | 14,641 | NA    | NA       |
| Palacios et al. 2019 <sup>6</sup> | Vitamin D supplements         | Gestational diabetes           | 5  | 1,846  | 77    | Moderate |
| Palacios et al. 2019 <sup>6</sup> | Vitamin D supplements         | Preterm birth                  | 4  | 2,294  | 189   | Low      |
| Palacios et al. 2019 <sup>6</sup> | Vitamin D supplements         | Birth length                   | 11 | 3,058  | NA    | NA       |
| Palacios et al. 2019 <sup>6</sup> | Vitamin D supplements         | Birth weight                   | 13 | 3,240  | NA    | NA       |
| Palacios et al. 2019 <sup>6</sup> | Vitamin D supplements         | Head circumference at birth    | 10 | 2,998  | NA    | NA       |
| Palacios et al. 2019 <sup>6</sup> | Vitamin D supplements         | Pre-eclampsia                  | 5  | 1,553  | 96    | Low      |
| Rees et al. 2013a <sup>40</sup>   | Healthy diet (intake)         | Systolic blood pressure        | 11 | 6,406  | NA    | NA       |
| Rees et al. 2013a <sup>40</sup>   | Healthy diet (intake)         | Diastolic blood pressure       | 11 | 6,406  | NA    | NA       |
| Rees et al. 2013b <sup>42</sup>   | Selenium supplements          | All-cause mortality            | 2  | 18,452 | 1,336 | NA       |
| Rees et al. 2013b <sup>42</sup>   | Selenium supplements          | Cardiovascular mortality       | 2  | 18,452 | 342   | NA       |
| Rees et al. 2013b <sup>42</sup>   | Selenium supplements          | Combined cardiovascular events | 2  | 18,452 | 2,329 | NA       |
| Rees et al. 2019 <sup>3</sup>     | Mediterranean diet (intake)   | High Density Lipoprotein       | 6  | 891    | NA    | NA       |
| Rees et al. 2019 <sup>3</sup>     | Mediterranean diet (intake)   | Triglycerides                  | 7  | 939    | NA    | NA       |



## Supplementary data

|                                     |                                     |                                |    |        |       |                             |
|-------------------------------------|-------------------------------------|--------------------------------|----|--------|-------|-----------------------------|
| Rees et al. 2019 <sup>3</sup>       | Mediterranean diet (intake)         | Systolic blood pressure        | 4  | 448    | NA    | Low                         |
| Rees et al. 2019 <sup>3</sup>       | Mediterranean diet (intake)         | Cardiovascular mortality       | 1  | 7,447  | NA    | Low                         |
| Rees et al. 2019 <sup>3</sup>       | Mediterranean diet (intake)         | Combined cardiovascular events | 1  | 7,447  | NA    | NA                          |
| Rees et al. 2019 <sup>3</sup>       | Mediterranean diet (intake)         | All-cause mortality            | 1  | 7,447  | NA    | Low                         |
| Rutjes et al. 2018 <sup>10</sup>    | B-Vitamin supplements               | Dementia / MCI                 | 1  | 1,803  | 99    | Moderate                    |
| Rutjes et al. 2018 <sup>10</sup>    | Vitamin D3 supplements              | Dementia                       | 1  | 4,143  | 76    | Low                         |
| Sydenham et al. 2012 <sup>146</sup> | Omega-3 supplements                 | Mini-Mental State Examination  | 2  | 3,321  | NA    | NA                          |
| Tieu et al. 2017 <sup>12</sup>      | Healthy diet (intake)               | Preterm birth                  | 3  | 1,149  | 21    | NA                          |
| Tieu et al. 2017 <sup>12</sup>      | Healthy diet (intake)               | Small gestational age          | 2  | 715    | 51    | NA                          |
| Tieu et al. 2017 <sup>12</sup>      | Healthy diet (intake)               | Birth weight                   | 5  | 1,324  | NA    | NA                          |
| Tieu et al. 2017 <sup>12</sup>      | Healthy diet (intake)               | Gestational diabetes           | 5  | 1,279  | 135   | Very low                    |
| Usinger et al. 2012 <sup>148</sup>  | Fermented milk intake + supplements | Systolic blood pressure        | 15 | 1,232  | NA    | NA                          |
| Usinger et al. 2012 <sup>148</sup>  | Fermented milk intake + supplements | Diastolic blood pressure       | 15 | 1,232  | NA    | NA                          |
| Vinceti et al. 2018 <sup>14</sup>   | Selenium supplements                | Cancer                         | 5  | 21,860 | 2,332 | High (only for low RoB=3/5) |
| Vinceti et al. 2018 <sup>14</sup>   | Selenium supplements                | Cancer mortality               | 2  | 18,698 | 359   | High (only for low RoB=1/2) |
| Vinceti et al. 2018 <sup>14</sup>   | Selenium supplements                | Colorectal cancer              | 3  | 20,259 | 159   | High (only for low RoB=2/3) |
| Yao et al. 2017 <sup>45</sup>       | Fibre intake                        | Colorectal cancer              | 2  | 2,794  | 23    | Low                         |
| Yao et al. 2017 <sup>45</sup>       | Fibre intake                        | Colorectal adenoma             | 5  | 3,641  | 1,297 | Low                         |

HOMA-IR: homeostasis model assessment-insulin resistance; MCI: mild cognitive impairment; NA: not assessed; RoB: risk of bias.

Supplementary data

Supplementary Table 10: Risk of bias of included bodies of evidence from randomized controlled trials: Reported as number of low risk of bias studies per domain.

| Reference                             | Intervention (as defined by the authors) | Outcome (as defined by the authors) | Total Studies, n | Random sequence generation, n | Allocation concealment, n | Blinding of participants and personnel, n | Blinding of outcome assessment, n | Incomplete outcome data, n | Selective reporting, n | Other bias, n | Additional quality assessment, n                                                                                 |
|---------------------------------------|------------------------------------------|-------------------------------------|------------------|-------------------------------|---------------------------|-------------------------------------------|-----------------------------------|----------------------------|------------------------|---------------|------------------------------------------------------------------------------------------------------------------|
| Abdelhamid et al. 2018a <sup>15</sup> | Omega-3 intake + supplements             | Cardiovascular mortality            | 25               | 22                            | 16                        | 11                                        | 23                                | 18                         | 7                      | 24            | Attention: 21<br>Compliance: 12                                                                                  |
| Abdelhamid et al. 2018a <sup>15</sup> | Omega-3 intake + supplements             | Cardiovascular disease              | 38               | 33                            | 24                        | 18                                        | 30                                | 26                         | 10                     | 37            | Attention: 34<br>Compliance: 16                                                                                  |
| Abdelhamid et al. 2018a <sup>15</sup> | $\alpha$ -Linolenic acid intake          | Cardiovascular disease              | 5                | 4                             | 4                         | 4                                         | 4                                 | 5                          | 0                      | 5             | Attention: 3<br>Compliance: 3                                                                                    |
| Abdelhamid et al. 2018a <sup>15</sup> | Omega-3 intake + supplements             | Body weight                         | 12               | 11                            | 9                         | 8                                         | 9                                 | 8                          | 4                      | 12            | Attention: 11<br>Compliance: 7                                                                                   |
| Abdelhamid et al. 2018a <sup>15</sup> | Omega-3 intake + supplements             | All-cause mortality                 | 39               | 34                            | 27                        | 19                                        | 32                                | 27                         | 11                     | 36            | Attention: 35<br>Compliance: 18                                                                                  |
| Abdelhamid et al. 2018a <sup>15</sup> | $\alpha$ -Linolenic acid intake          | Cardiovascular mortality            | 4                | 3                             | 3                         | 4                                         | 4                                 | 4                          | 0                      | 4             | Attention: 3<br>Compliance: 2                                                                                    |
| Abdelhamid et al. 2018a <sup>15</sup> | $\alpha$ -Linolenic acid intake          | Coronary heart disease              | 4                | 4                             | 4                         | 3                                         | 3                                 | 4                          | 0                      | 4             | Attention: 2<br>Compliance: 3                                                                                    |
| Abdelhamid et al. 2018b <sup>21</sup> | Polyunsaturated fat intake + supplements | All-cause mortality                 | 24               | 20                            | 11                        | 7                                         | 16                                | 17                         | 3                      | 21            | Attention: 17<br>Compliance: 11                                                                                  |
| Abdelhamid et al. 2018b <sup>21</sup> | Polyunsaturated fat intake + supplements | Coronary heart disease              | 15               | 12                            | 5                         | 6                                         | 12                                | 9                          | 0                      | 14            | Attention: 11<br>Compliance: 7                                                                                   |
| Abdelhamid et al. 2018b <sup>21</sup> | Polyunsaturated fat intake               | Major cardiovascular events         | 2                | 2                             | 0                         | 1                                         | 2                                 | 2                          | 0                      | 2             | Attention: 1<br>Compliance: 2                                                                                    |
| Adler et al. 2014 <sup>23</sup>       | Low-sodium intake                        | All-cause mortality                 | 7                | 3                             | 4                         | 5                                         | 6                                 | 3                          | 6                      | NA            | Compliance: 6<br>Groups balanced at baseline: 6<br>intention-to-treat analysis: 6<br>free from follow-up bias: 3 |
| Adler et al. 2014 <sup>23</sup>       | Low-sodium intake                        | Cardiovascular mortality            | 3                | 2                             | 1                         | 2                                         | 3                                 | 1                          | 3                      | NA            | Compliance: 3<br>Groups balanced at baseline: 3<br>intention-to-treat analysis: 2<br>free from follow-up bias: 1 |
| Adler et al. 2014 <sup>23</sup>       | Low-sodium intake                        | Cardiovascular disease              | 4                | 3                             | 2                         | 2                                         | 4                                 | 1                          | 3                      | NA            | Compliance: 4<br>Groups balanced at baseline: 4<br>intention-to-treat analysis: 3<br>free from follow-up bias: 1 |
| Adler et al. 2014 <sup>23</sup>       | Low-sodium intake                        | Systolic blood pressure             | 6                | 3                             | 5                         | 4                                         | 5                                 | 3                          | 5                      | NA            | Compliance: 6<br>Groups balanced at baseline: 6<br>intention-to-treat analysis: 5<br>free from follow-up bias: 1 |
| Adler et al. 2014 <sup>23</sup>       | Low-sodium intake                        | Diastolic blood pressure            | 5                | 2                             | 4                         | 3                                         | 4                                 | 3                          | 4                      | NA            | Compliance: 5<br>Groups balanced at baseline: 5<br>intention-to-treat analysis: 5<br>free from follow-up bias: 1 |
| Al-Khudairy et al. 2017 <sup>1</sup>  | Vitamin C supplements                    | Major cardiovascular events         | 1                | 1                             | 0                         | 1                                         | 1                                 | 1                          | 1                      | 0             | NA                                                                                                               |
| Al-Khudairy et al. 2017 <sup>1</sup>  | Vitamin C supplements                    | Cardiovascular mortality            | 1                | 1                             | 0                         | 1                                         | 1                                 | 1                          | 1                      | 0             | NA                                                                                                               |

## Supplementary data

|                                        |                               |                                     |    |    |    |    |    |    |    |    |                    |
|----------------------------------------|-------------------------------|-------------------------------------|----|----|----|----|----|----|----|----|--------------------|
| Al-Khudairy et al. 2017 <sup>1</sup>   | Vitamin C supplements         | All-cause mortality                 | 1  | 1  | 0  | 1  | 1  | 1  | 1  | 0  | NA                 |
| Avenell et al. 2014 <sup>27</sup>      | Vitamin D supplements         | Hip fracture                        | 10 | 8  | 9  | NA | NA | NA | NA | NA | NA                 |
| Avenell et al. 2014 <sup>27</sup>      | Vitamin D supplements         | Any fracture                        | 14 | 11 | 11 | NA | NA | NA | NA | NA | NA                 |
| Bjelakovic et al. 2012 <sup>117</sup>  | $\beta$ -carotene supplements | All-cause mortality                 | 31 | 27 | 29 | 29 |    | 28 | 30 | 28 | NA                 |
| Bjelakovic et al. 2012 <sup>117</sup>  | Vitamin E supplements         | All-cause mortality                 | 64 | 49 | 50 | 59 |    | 60 | 63 | 53 | NA                 |
| Bjelakovic et al. 2012 <sup>117</sup>  | Vitamin C supplements         | All-cause mortality                 | 41 | 32 | 32 | 37 |    | 37 | 40 | 35 | NA                 |
| Bjelakovic et al. 2012 <sup>117</sup>  | Vitamin A supplements         | All-cause mortality                 | 18 | 14 | 13 | 16 |    | 16 | 18 | 14 | NA                 |
| Bjelakovic et al. 2014a <sup>118</sup> | Vitamin D supplements         | All-cause mortality                 | 56 | 43 | 37 | 34 |    | 54 | 51 | 54 | Industry bias: 7   |
| Bjelakovic et al. 2014a <sup>118</sup> | Vitamin D supplements         | Cardiovascular mortality            | 10 | 9  | 7  | 7  |    | 10 | 9  | 10 | Industry bias: 1   |
| Bjelakovic et al. 2014a <sup>118</sup> | Vitamin D supplements         | Cancer mortality                    | 4  | 4  | 4  | 4  |    | 4  | 4  | 4  | Industry bias: 1   |
| Bjelakovic et al. 2014b <sup>29</sup>  | Vitamin D supplements         | Cancer occurrence                   | 18 | 16 | 15 | 14 | 14 | 17 | 17 | 18 | For-profit bias: 2 |
| Bjelakovic et al. 2014b <sup>29</sup>  | Vitamin D3 supplements        | Breast cancer                       | 7  | 7  | 7  | 6  | 6  | 6  | 6  | 7  | For-profit bias: 1 |
| Bjelakovic et al. 2014b <sup>29</sup>  | Vitamin D3 supplements        | Lung cancer                         | 5  | 5  | 5  | 4  | 4  | 4  | 4  | 5  | For-profit bias: 1 |
| Cormick et al. 2015 <sup>121</sup>     | Calcium supplements           | Systolic blood pressure             | 16 | 10 | 7  | 11 | 11 | 10 | 16 | 12 | NA                 |
| Cormick et al. 2015 <sup>121</sup>     | Calcium supplements           | Diastolic blood pressure            | 15 | 9  | 6  | 10 | 10 | 9  | 15 | 11 | NA                 |
| De-Regil et al. 2015 <sup>123</sup>    | Folate supplements            | Neural tube defect                  | 5  | 3  | 2  | 5  | 0  | 0  | 0  | 0  | NA                 |
| De-Regil et al. 2015 <sup>123</sup>    | Folate supplements            | Congenital cardiovascular anomalies | 3  | 2  | 1  | 3  | 0  | 0  | 0  | 0  | NA                 |
| El Dib et al. 2015 <sup>126</sup>      | Zinc supplements              | HOMA-IR                             | 1  | 0  | 0  | 1  | 0  | 1  | 1  | 1  | NA                 |
| Hartley et al. 2013 <sup>128</sup>     | Fruit & Vegetables intake     | Systolic blood pressure             | 2  | 1  | 0  | 0  | 1  | 2  | 0  | 0  | NA                 |
| Hartley et al. 2013 <sup>128</sup>     | Fruit & Vegetables intake     | Diastolic blood pressure            | 2  | 1  | 0  | 0  | 1  | 2  | 0  | 0  | NA                 |
| Hartley et al. 2016 <sup>130</sup>     | Fibre intake + supplements    | Systolic blood pressure             | 8  | 3  | 3  | 4  | 2  | 1  | 0  | 0  | NA                 |
| Hartley et al. 2016 <sup>130</sup>     | Fibre intake + supplements    | Diastolic blood pressure            | 8  | 3  | 3  | 4  | 2  | 1  | 0  | 0  | NA                 |
| Hemmingsen et al. 2017 <sup>131</sup>  | Healthy diet (intake)         | Type 2 diabetes                     | 1  | 0  | 0  | 1  | 0  | 0  | 0  | 0  | NA                 |

## Supplementary data

|                                       |                                               |                                |    |    |    |    |    |    |    |    |                                                                                                                                  |
|---------------------------------------|-----------------------------------------------|--------------------------------|----|----|----|----|----|----|----|----|----------------------------------------------------------------------------------------------------------------------------------|
| Hemmingsen et al. 2017 <sup>151</sup> | Healthy diet (intake)                         | All-cause mortality            | 1  | 0  | 0  | 1  | 0  | 0  | 0  | 0  | NA                                                                                                                               |
| Hofmeyr et al. 2018 <sup>32</sup>     | Calcium supplements                           | Pre-eclampsia                  | 13 | 8  | 11 | 11 | 11 | 10 | 9  | 4  | NA                                                                                                                               |
| Hofmeyr et al. 2018 <sup>32</sup>     | Calcium supplements                           | High blood pressure            | 12 | 7  | 10 | 10 | 10 | 10 | 9  | 4  | NA                                                                                                                               |
| Hooper et al. 2012 <sup>34</sup>      | Low-fat / modified fat (intake + supplements) | Cardiovascular mortality       | 14 | 12 | 5  | 2  |    | 6  | 14 | 14 | Free of systematic difference in care: 3<br>Free of dietary differences other than fat: 8                                        |
| Hooper et al. 2012 <sup>34</sup>      | Low-fat / modified fat (intake + supplements) | All-cause mortality            | 20 | 18 | 10 | 3  |    | 10 | 20 | 20 | Free of systematic difference in care: 5<br>Free of dietary differences other than fat: 11                                       |
| Hooper et al. 2012 <sup>34</sup>      | Low-fat / modified fat (intake + supplements) | Combined cardiovascular events | 18 | 16 | 6  | 3  |    | 6  | 18 | 18 | Free of systematic difference in care: 5<br>Free of dietary differences other than fat: 10                                       |
| Hooper et al. 2012 <sup>34</sup>      | Low-fat intake                                | Body weight                    | 16 | 16 | 11 | 1  |    | 4  | 16 | 16 | Free of systematic difference in care: 7<br>Free of dietary differences other than fat: 9                                        |
| Hooper et al. 2015a <sup>136</sup>    | Low-fat intake                                | Body weight                    | 25 | 18 | 10 | 1  |    | 7  | 3  | 25 | Free of systematic difference in care: 6<br>Free of dietary differences other than fat: 17                                       |
| Hooper et al. 2015b <sup>35</sup>     | Low saturated fat intake                      | All-cause mortality            | 11 | 11 | 5  | 1  |    | 7  | 11 | 11 | Free of systematic difference in care: 2<br>Stated aim to reduce SFA: 8<br>Achieved SFA reduction: 8<br>Achieved TC reduction: 6 |
| Hooper et al. 2015b <sup>35</sup>     | Low saturated fat intake                      | Cardiovascular mortality       | 10 | 10 | 4  | 1  |    | 6  | 10 | 10 | Free of systematic difference in care: 2<br>Stated aim to reduce SFA: 8<br>Achieved SFA reduction: 7<br>Achieved TC reduction: 6 |
| Hooper et al. 2015b <sup>35</sup>     | Low saturated fat intake                      | Combined cardiovascular events | 11 | 11 | 4  | 1  |    | 5  | 11 | 11 | Free of systematic difference in care: 2<br>Stated aim to reduce SFA: 9<br>Achieved SFA reduction: 7<br>Achieved TC reduction: 7 |
| Hooper et al. 2018 <sup>37</sup>      | Omega-6 intake + supplements                  | Combined cardiovascular events | 7  | 6  | 2  | 4  | 6  | 5  | 0  | 7  | Attention: 4<br>Compliance: 3                                                                                                    |
| Hooper et al. 2018 <sup>37</sup>      | Omega-6 intake + supplements                  | All-cause mortality            | 10 | 8  | 2  | 4  | 7  | 8  | 0  | 9  | Attention: 5<br>Compliance: 5                                                                                                    |
| Hooper et al. 2018 <sup>37</sup>      | Omega-6 intake + supplements                  | Cardiovascular mortality       | 7  | 6  | 1  | 2  | 6  | 5  | 0  | 6  | Attention: 2<br>Compliance: 4                                                                                                    |
| Jin et al. 2012 <sup>137</sup>        | Total flavonoids intake                       | Colorectal adenoma             | 1  | 0  | 0  | 0  | 0  | 0  | 0  | 1  | NA                                                                                                                               |
| Jin et al. 2012 <sup>137</sup>        | Isoflavonoes intake                           | Colorectal adenoma             | 1  | 0  | 0  | 0  | 0  | 0  | 0  | 1  | NA                                                                                                                               |
| Jin et al. 2012 <sup>137</sup>        | Flavonols intake                              | Colorectal adenoma             | 1  | 0  | 0  | 0  | 0  | 0  | 0  | 1  | NA                                                                                                                               |
| Keats et al. 2019 <sup>38</sup>       | Micronutrients supplements                    | Preterm birth                  | 18 | 15 | 13 | 16 | 17 | 11 | 18 | 18 | NA                                                                                                                               |

## Supplementary data

|                                   |                               |                                |    |    |    |    |    |    |    |    |                                                                    |
|-----------------------------------|-------------------------------|--------------------------------|----|----|----|----|----|----|----|----|--------------------------------------------------------------------|
| Keats et al. 2019 <sup>38</sup>   | Micronutrients supplements    | Low birth weight               | 18 | 15 | 13 | 16 | 17 | 11 | 18 | 18 | NA                                                                 |
| Keats et al. 2019 <sup>38</sup>   | Micronutrients supplements    | Small gestational age          | 17 | 14 | 12 | 15 | 16 | 10 | 17 | 17 | NA                                                                 |
| Kelly et al. 2017 <sup>138</sup>  | Whole grain intake            | Systolic blood pressure        | 8  | 4  | 3  | NA | 4  | 3  | 0  | 3  | Intention to treat analysis: 1<br>Groups comparable at baseline: 4 |
| Kelly et al. 2017 <sup>138</sup>  | Whole grain intake            | Diastolic blood pressure       | 8  | 4  | 3  | NA | 4  | 3  | 0  | 3  | Intention to treat analysis: 1<br>Groups comparable at baseline: 4 |
| Kelly et al. 2017 <sup>138</sup>  | Whole grain intake            | Body weight                    | 5  | 4  | 1  | NA | 1  | 1  | 0  | 1  | Intention to treat analysis: 0<br>Groups comparable at baseline: 3 |
| Mathew et al. 2012 <sup>140</sup> | $\beta$ -carotene supplements | Cataract                       | 2  | 2  | 2  | 2  |    | 2  | 2  | 2  | NA                                                                 |
| Mathew et al. 2012 <sup>140</sup> | Vitamin E supplements         | Cataract                       | 3  | 3  | 3  | 3  |    | 2  | 3  | 2  | NA                                                                 |
| Mathew et al. 2012 <sup>140</sup> | Vitamin C supplements         | Cataract                       | 1  | 1  | 1  | 1  |    | 1  | 1  | 1  | NA                                                                 |
| Palacios et al. 2019 <sup>6</sup> | Vitamin D supplements         | Gestational diabetes           | 5  | 5  | 2  | 4  | 4  | 4  | 4  | 3  | NA                                                                 |
| Palacios et al. 2019 <sup>6</sup> | Vitamin D supplements         | Preterm birth                  | 4  | 4  | 3  | 3  | 3  | 3  | 3  | 3  | NA                                                                 |
| Palacios et al. 2019 <sup>6</sup> | Vitamin D supplements         | Birth length                   | 11 | 11 | 8  | 8  | 9  | 8  | 8  | 7  | NA                                                                 |
| Palacios et al. 2019 <sup>6</sup> | Vitamin D supplements         | Birth weight                   | 13 | 12 | 8  | 9  | 10 | 10 | 10 | 8  | NA                                                                 |
| Palacios et al. 2019 <sup>6</sup> | Vitamin D supplements         | Head circumference at birth    | 10 | 10 | 7  | 7  | 8  | 8  | 8  | 6  | NA                                                                 |
| Palacios et al. 2019 <sup>6</sup> | Vitamin D supplements         | Pre-eclampsia                  | 5  | 5  | 2  | 4  | 4  | 4  | 4  | 3  | NA                                                                 |
| Rees et al. 2013a <sup>40</sup>   | Healthy diet (intake)         | Systolic blood pressure        | 11 | 1  | 1  | 0  | 1  | 2  | 1  | 0  | NA                                                                 |
| Rees et al. 2013a <sup>40</sup>   | Healthy diet (intake)         | Diastolic blood pressure       | 11 | 1  | 1  | 0  | 1  | 2  | 1  | 0  | NA                                                                 |
| Rees et al. 2013b <sup>42</sup>   | Selenium supplements          | All-cause mortality            | 2  | 1  | 1  | 1  | 1  | 2  | 0  | 0  | NA                                                                 |
| Rees et al. 2013b <sup>42</sup>   | Selenium supplements          | Cardiovascular mortality       | 2  | 1  | 1  | 1  | 1  | 2  | 0  | 0  | NA                                                                 |
| Rees et al. 2013b <sup>42</sup>   | Selenium supplements          | Combined cardiovascular events | 2  | 1  | 1  | 1  | 1  | 2  | 0  | 0  | NA                                                                 |
| Rees et al. 2019 <sup>3</sup>     | Mediterranean diet (intake)   | High Density Lipoprotein       | 6  | 3  | 1  | 0  | 2  | 4  | 6  | 0  | NA                                                                 |
| Rees et al. 2019 <sup>3</sup>     | Mediterranean diet (intake)   | Triglycerides                  | 7  | 4  | 1  | 0  | 2  | 4  | 7  | 0  | NA                                                                 |
| Rees et al. 2019 <sup>3</sup>     | Mediterranean diet (intake)   | Systolic blood pressure        | 4  | 2  | 1  | 0  | 1  | 2  | 3  | 0  | NA                                                                 |
| Rees et al. 2019 <sup>3</sup>     | Mediterranean diet (intake)   | Cardiovascular mortality       | 1  | 1  | 0  | 0  | 0  | 1  | 1  | 0  | NA                                                                 |

## Supplementary data

|                                     |                                     |                                |    |   |   |                                  |                                  |    |    |    |    |
|-------------------------------------|-------------------------------------|--------------------------------|----|---|---|----------------------------------|----------------------------------|----|----|----|----|
| Rees et al. 2019 <sup>3</sup>       | Mediterranean diet (intake)         | Combined cardiovascular events | 1  | 1 | 0 | 0                                | 0                                | 1  | 1  | 0  | NA |
| Rees et al. 2019 <sup>3</sup>       | Mediterranean diet (intake)         | All-cause mortality            | 1  | 1 | 0 | 0                                | 0                                | 1  | 1  | 0  | NA |
| Rutjes et al. 2018 <sup>10</sup>    | B-Vitamin supplements               | Dementia / MCI                 | 1  | 1 | 1 | 1                                | 1                                | 1  | 1  | 1  | NA |
| Rutjes et al. 2018 <sup>10</sup>    | Vitamin D3 supplements              | Dementia                       | 1  | 1 | 0 | 1                                | 1                                | 1  | 1  | 1  | NA |
| Sydenham et al. 2012 <sup>146</sup> | Omega-3 supplements                 | Mini-Mental State Examination  | 2  | 2 | 2 | 2                                | 2                                | 2  | 2  | 2  | NA |
| Tieu et al. 2017 <sup>12</sup>      | Healthy diet (intake)               | Preterm birth                  | 3  | 3 | 3 | 0                                | 0                                | 2  | 1  | 2  | NA |
| Tieu et al. 2017 <sup>12</sup>      | Healthy diet (intake)               | Small gestational age          | 2  | 2 | 0 | 0                                | 1                                | 1  | 1  | 1  | NA |
| Tieu et al. 2017 <sup>12</sup>      | Healthy diet (intake)               | Birth weight                   | 5  | 5 | 4 | 0                                | 1                                | 3  | 1  | 5  | NA |
| Tieu et al. 2017 <sup>12</sup>      | Healthy diet (intake)               | Gestational diabetes           | 5  | 5 | 4 | 0                                | 1                                | 3  | 1  | 5  | NA |
| Usinger et al. 2012 <sup>148</sup>  | Fermented milk intake + supplements | Systolic blood pressure        | 15 | 4 | 4 | 11<br>(Blinding of participants) | 8<br>(Blinding of investigators) | 13 | 14 | 9  | NA |
| Usinger et al. 2012 <sup>148</sup>  | Fermented milk intake + supplements | Diastolic blood pressure       | 15 | 4 | 4 | 11<br>(Blinding of participants) | 8<br>(Blinding of investigators) | 13 | 14 | 9  | NA |
| Vinceti et al. 2018 <sup>14</sup>   | Selenium supplements                | Cancer                         | 5  | 4 | 4 | 3                                |                                  | NA | 5  | NA | NA |
| Vinceti et al. 2018 <sup>14</sup>   | Selenium supplements                | Cancer mortality               | 2  | 2 | 2 | 1                                |                                  | NA | 2  | NA | NA |
| Vinceti et al. 2018 <sup>14</sup>   | Selenium supplements                | Colorectal cancer              | 3  | 3 | 3 | 2                                |                                  | NA | 3  | NA | NA |
| Yao et al. 2017 <sup>45</sup>       | Fibre intake                        | Colorectal cancer              | 2  | 1 | 1 | 0                                | 0                                | 0  | 2  | 0  | NA |
| Yao et al. 2017 <sup>45</sup>       | Fibre intake                        | Colorectal adenoma             | 5  | 4 | 2 | 1                                | 1                                | 0  | 5  | 0  | NA |

HOMA-IR: homeostasis model assessment-insulin resistance; MCI: mild cognitive impairment; NA: not assessed; RCT: randomized controlled trial; SFA: saturated fatty acid; TC: total cholesterol.

## Supplementary data

Supplementary Table 11: Characteristics of included bodies of evidence from cohort studies.

| Reference                           | Exposure (as defined by the authors) | Outcome (as defined by the authors) | Studies, n | Sample size, n | Cases, n | Description of population                                                                  | Age, mean | Description of exposure                                                | Description of comparator                                              | Description of outcome                                                   | Study design                                                                                                               | Study length / follow-up (years) |
|-------------------------------------|--------------------------------------|-------------------------------------|------------|----------------|----------|--------------------------------------------------------------------------------------------|-----------|------------------------------------------------------------------------|------------------------------------------------------------------------|--------------------------------------------------------------------------|----------------------------------------------------------------------------------------------------------------------------|----------------------------------|
| Aburto et al. 2013 <sup>24</sup>    | Low-sodium intake                    | All-cause mortality                 | 2          | 22,550         | NA       | General population                                                                         | 25-74     | Sodium intake                                                          | Sodium intake                                                          | All-cause mortality                                                      | Cohort studies                                                                                                             | 9-22                             |
| Aburto et al. 2013 <sup>24</sup>    | Low-sodium intake                    | Cardiovascular mortality            | 3          | 81,280         | NA       | General population                                                                         | 25-79     | Sodium intake                                                          | Sodium intake                                                          | Cardiovascular disease mortality                                         | Cohort studies                                                                                                             | 9-22                             |
| Aburto et al. 2013 <sup>24</sup>    | Low-sodium intake                    | Cardiovascular disease              | 3          | 81,280         | NA       | General population                                                                         | 25-79     | Sodium intake                                                          | Sodium intake                                                          | Cardiovascular disease                                                   | Cohort studies                                                                                                             | 9-22                             |
| Aune et al. 2018 <sup>26</sup>      | Vitamin C intake                     | Cardiovascular diseases             | 9          | 246,711        | 7,986    | General population                                                                         | 30-93     | Dietary Vitamin C (ascorbic acid)                                      | Dietary Vitamin C (ascorbic acid)                                      | Cardiovascular disease                                                   | Prospective cohort studies, nested case-control                                                                            | 4-17                             |
| Aune et al. 2018 <sup>26</sup>      | Vitamin C intake                     | Cardiovascular mortality            | 9          | NA             | NA       | NA, but we expect it to be similar to the population of the outcome cardiovascular disease | NA        | Dietary Vitamin C (ascorbic acid)                                      | Dietary Vitamin C (ascorbic acid)                                      | Mortality from coronary heart disease, stroke and cardiovascular disease | NA                                                                                                                         | NA                               |
| Aune et al. 2018 <sup>26</sup>      | Vitamin C intake                     | All-cause mortality                 | 16         | 315,214        | 38,079   | General population                                                                         | 16-101    | Dietary Vitamin C (ascorbic acid)                                      | Dietary Vitamin C (ascorbic acid)                                      | All-cause mortality                                                      | Prospective cohort studies, nested case-control                                                                            | 4-32                             |
| Aune et al. 2018 <sup>26</sup>      | $\beta$ -carotene intake             | All-cause mortality                 | 8          | 142,798        | 11,729   | General population                                                                         | 30-93     | Dietary $\beta$ -carotene                                              | Dietary $\beta$ -carotene                                              | All-cause mortality                                                      | Prospective cohort studies, nested case-control                                                                            | 4-21                             |
| Aune et al. 2018 <sup>26</sup>      | Vitamin E intake                     | All-cause mortality                 | 9          | 229,830        | 15,321   | General population                                                                         | 30-101    | Dietary Vitamin E (tocopherol)                                         | Dietary Vitamin E (tocopherol)                                         | All-cause mortality                                                      | Prospective cohort studies, nested case-control                                                                            | 4-14                             |
| Aune et al. 2018 <sup>26</sup>      | Vitamin C intake                     | All-cause mortality                 | 16         | 315,214        | 38,079   | General population                                                                         | 16-101    | Dietary Vitamin C (ascorbic acid)                                      | Dietary Vitamin C (ascorbic acid)                                      | All-cause mortality                                                      | Prospective cohort studies, nested case-control                                                                            | 4-32                             |
| Aune et al. 2011 <sup>150</sup>     | Fibre intake                         | Colorectal cancer                   | 19         | 1,797,670      | 14,794   | General population, smokers                                                                | 16-89     | Dietary fibre intake                                                   | Dietary fibre intake                                                   | Colorectal cancer                                                        | Prospective cohort studies, case-cohort and nested case-control included. No separate statement for this outcome possible. | 4-17                             |
| Ben et al. 2014 <sup>46</sup>       | Fibre intake                         | Colorectal adenoma                  | 4          | 78,348         | 2,402    | General population having a colonoscopy and / or sigmoidoscopy                             | 30+       | Dietary fibre, crude fibre, fruit fibre, vegetable fibre, grains fibre | Dietary fibre, crude fibre, fruit fibre, vegetable fibre, grains fibre | Colorectal adenoma                                                       | Cohort studies                                                                                                             | 2-26                             |
| Blencowe et al. 2010 <sup>124</sup> | Folate supplements                   | Neural tube defect                  | 3          | NA             | NA       | Pregnant women                                                                             | NA        | Folic acid supplementation                                             | Folic acid supplementation                                             | Neural tube disorders mortality and morbidity                            | Cohort studies                                                                                                             | NA                               |

Supplementary data

|                                      |                       |                                  |    |         |       |                                                                                            |            |                                                                                                                                                                                   |                                                                                                                                                                                   |                                                                                                          |                            |      |
|--------------------------------------|-----------------------|----------------------------------|----|---------|-------|--------------------------------------------------------------------------------------------|------------|-----------------------------------------------------------------------------------------------------------------------------------------------------------------------------------|-----------------------------------------------------------------------------------------------------------------------------------------------------------------------------------|----------------------------------------------------------------------------------------------------------|----------------------------|------|
| Chia et al. 2019 <sup>11</sup>       | Healthy diet (intake) | Preterm birth                    | 5  | 113,703 | NA    | Pregnant women, generally healthy                                                          | mean 21-30 | Healthy dietary patterns by the 2015 United States Dietary Guideline (high intake of 3 or more key components: vegetables, fruits, wholegrains, low-fat dairy, lean protein food) | Healthy dietary patterns by the 2015 United States Dietary Guideline (high intake of 3 or more key components: vegetables, fruits, wholegrains, low-fat dairy, lean protein food) | Preterm birth (<37 weeks of gestation)                                                                   | Prospective cohort studies | NA   |
| Chia et al. 2019 <sup>11</sup>       | Healthy diet (intake) | Small gestational age            | 8  | 75,446  | NA    | Pregnant women, generally healthy                                                          | mean 21-32 | Healthy dietary patterns by the 2015 United States Dietary Guideline (high intake of 3 or more key components: vegetables, fruits, wholegrains, low-fat dairy, lean protein food) | Healthy dietary patterns by the 2015 United States Dietary Guideline (high intake of 3 or more key components: vegetables, fruits, wholegrains, low-fat dairy, lean protein food) | Small-for-gestational-age (<10th percentile)                                                             | Prospective cohort studies | NA   |
| Chia et al. 2019 <sup>11</sup>       | Healthy diet (intake) | Birth weight                     | 12 | 24,950  | NA    | Pregnant women, generally healthy                                                          | mean 23-33 | Healthy dietary patterns by the 2015 United States Dietary Guideline (high intake of 3 or more key components: vegetables, fruits, wholegrains, low-fat dairy, lean protein food) | Healthy dietary patterns by the 2015 United States Dietary Guideline (high intake of 3 or more key components: vegetables, fruits, wholegrains, low-fat dairy, lean protein food) | Birth weight                                                                                             | Prospective cohort studies | NA   |
| Chowdhury et al. 2014a <sup>18</sup> | Omega-3 intake        | Coronary heart disease mortality | NA | 104,681 | 1,483 | NA, but we expect it to be similar to the population of the outcome coronary heart disease | NA         | Dietary long-chain Omega-3 intake                                                                                                                                                 | Dietary long-chain Omega-3 intake                                                                                                                                                 | Fatal coronary outcome                                                                                   | Prospective cohort studies | NA   |
| Chowdhury et al. 2014a <sup>18</sup> | Omega-3 intake        | Coronary heart disease           | 16 | 422,786 | 9,089 | General healthy population; people with history of CHD (1x)                                | 18-84      | Dietary long-chain Omega-3 intake                                                                                                                                                 | Dietary long-chain Omega-3 intake                                                                                                                                                 | Coronary diseases (myocardial infarction, coronary heart disease, sudden cardiac death, angina pectoris) | Prospective cohort studies | 5-23 |
| Chowdhury et al. 2014a <sup>18</sup> | Omega-6 intake        | Coronary heart disease           | 8  | 206,376 | 8,155 | General healthy population; people with risk of CHD (1x)                                   | 20-75      | Dietary Omega-6 intake                                                                                                                                                            | Dietary Omega-6 intake                                                                                                                                                            | Coronary diseases (myocardial infarction, coronary heart disease, sudden cardiac death)                  | Prospective cohort studies | 5-20 |



Supplementary data

|                                          |                          |                          |    |         |        |                                                                                                                                                                                                                                                                                     |                    |                                                    |                                                    |                                                             |                                                 |        |
|------------------------------------------|--------------------------|--------------------------|----|---------|--------|-------------------------------------------------------------------------------------------------------------------------------------------------------------------------------------------------------------------------------------------------------------------------------------|--------------------|----------------------------------------------------|----------------------------------------------------|-------------------------------------------------------------|-------------------------------------------------|--------|
| Chowdhury et al. 2014b <sup>119</sup>    | Vitamin D status         | All-cause mortality      | 68 | 840,908 | 64,636 | Mostly general population; healthy people; postmenopausal women; people with chronic kidney disease, heart failure, diabetes, acute coronary syndrome, CHD, COPD, cancer (colorectal, breast, lung, skin, non-Hodgkin, leukaemia, head & neck); elderly people; medical-in patients | 29-84              | Circulating 25-hydroxyvitamin D (Serum and Plasma) | Circulating 25-hydroxyvitamin D (Serum and Plasma) | All-cause mortality                                         | Cohort studies                                  | 0.3-29 |
| Chowdhury et al. 2014b <sup>119</sup>    | Vitamin D status         | Cardiovascular mortality | 29 | 101,649 | 10,203 | Mostly general population; healthy people; postmenopausal women; people with chronic kidney disease, diabetes, acute coronary syndrome, CHD; elderly people                                                                                                                         | 40-79              | Circulating 25-hydroxyvitamin D (Serum and Plasma) | Circulating 25-hydroxyvitamin D (Serum and Plasma) | Death from cardiovascular disease                           | Cohort studies                                  | 0.3-29 |
| de Souza et al. 2015 <sup>36</sup>       | Low saturated fat intake | All-cause mortality      | 5  | 99,906  | 14,090 | Apparently healthy adults                                                                                                                                                                                                                                                           | 16-89 (mean 56-60) | Saturated fat intake (self-reported or plasma)     | Saturated fat intake (self-reported or plasma)     | All-cause mortality                                         | Prospective cohort studies                      | 7-19   |
| de Souza et al. 2015 <sup>36</sup>       | Low saturated fat intake | Cardiovascular mortality | 3  | 90,501  | 3,792  | Apparently healthy adults                                                                                                                                                                                                                                                           | 35-89 (mean 56-59) | Saturated fat intake (self-reported)               | Saturated fat intake (self-reported)               | Cardiovascular disease mortality                            | Prospective cohort studies                      | 7-19   |
| de Souza et al. 2015 <sup>36</sup>       | Low saturated fat intake | Coronary heart disease   | 12 | 267,416 | 6,383  | Apparently healthy adults                                                                                                                                                                                                                                                           | 30-85              | Saturated fat intake (self-reported or biomarker)  | Saturated fat intake (self-reported or biomarker)  | Coronary heart disease                                      | Prospective cohort studies                      | 1-20   |
| Doets et al. 2013 <sup>145</sup>         | Vitamin B12 intake       | Dementia                 | 3  | 5,254   | 431    | Elderly general population                                                                                                                                                                                                                                                          | mean 70-75         | Vitamin B12 intake                                 | Vitamin B12 intake                                 | Alzheimer disease                                           | Prospective cohort studies                      | 4-9    |
| Feng et al. 2017 <sup>28</sup>           | Vitamin D status         | Hip fracture             | 11 | 34,557  | 2,996  | General population                                                                                                                                                                                                                                                                  | 65-96 (mean 57-75) | Serum 25(OH) vitamin D level                       | Serum 25(OH) vitamin D level                       | Fractures (medical / radiological records or self-reported) | Prospective cohort studies, nested case-control | 4-17   |
| Feng et al. 2017 <sup>28</sup>           | Vitamin D status         | Any fracture             | 11 | 30,489  | 4,279  | General population                                                                                                                                                                                                                                                                  | 50-79 (mean 57-76) | Serum 25(OH) vitamin D level                       | Serum 25(OH) vitamin D level                       | Fractures (medical / radiological records or self-reported) | Prospective cohort studies, nested case-control | 4-17   |
| Feng et al. 2015 <sup>125</sup>          | Folate supplements       | Congenital heart defect  | 1  | 6,112   | NA     | Pregnant women                                                                                                                                                                                                                                                                      | NA                 | Maternal folic acid supplementation                | No maternal folic acid supplementation             | Congenital heart defect                                     | Cohort study                                    | 3      |
| Fernandez-Cao et al. 2019 <sup>127</sup> | Zinc supplements         | Type 2 diabetes          | 2  | 258,139 | 17,806 | General population                                                                                                                                                                                                                                                                  | 50-71 (mean 58)    | Supplementary zinc intake                          | Supplementary zinc intake                          | Type 2 diabetes mellitus                                    | Prospective cohort studies                      | 10-19  |

## Supplementary data

|                                     |                              |                          |    |         |                         |                                                        |                         |                                                                  |                                                                  |                                               |                                                 |       |
|-------------------------------------|------------------------------|--------------------------|----|---------|-------------------------|--------------------------------------------------------|-------------------------|------------------------------------------------------------------|------------------------------------------------------------------|-----------------------------------------------|-------------------------------------------------|-------|
| Goodwill et al. 2017 <sup>9</sup>   | Vitamin D status             | Dementia / MCI           | 14 | 30,452  | NA                      | General population, general older population, nurses   | mean 45-80              | Vitamin D status (serum / plasma)                                | Vitamin D status (serum / plasma)                                | Cognition (via valid neuropsychological test) | Longitudinal cohort studies                     | 2-13  |
| Han et al. 2019 <sup>120</sup>      | Vitamin D status             | Cancer mortality         | 16 | 10,794  | 8,729                   | General population; patients with coronary angiography | 44-75                   | Circulating 25-hydroxyvitamin D (Serum and Plasma)               | Circulating 25-hydroxyvitamin D (Serum and Plasma)               | Cancer mortality                              | Prospective cohort studies                      | 4-28  |
| Han et al. 2019 <sup>120</sup>      | Vitamin D status             | Cancer incidence         | 8  | 70,018  | 7,511                   | General population                                     | 54-74                   | Circulating 25-hydroxyvitamin D (Serum and Plasma)               | Circulating 25-hydroxyvitamin D (Serum and Plasma)               | Cancer incidence                              | Prospective cohort studies                      | 5-28  |
| Hossain et al. 2019 <sup>30</sup>   | Vitamin D supplements        | Breast cancer            | 2  | 37,707  | 1,611 (1 study unclear) | General population                                     | 35-74 (56-62)           | Vitamin D supplement use                                         | No Supplement use                                                | Breast cancer (self - reported)               | Prospective cohort studies, nested case-control | 18    |
| Hu et al. 2018 <sup>5</sup>         | Vitamin D status             | Gestational diabetes     | 13 | 12,958  | 1,358                   | Pregnant women                                         | NA                      | Vitamin D sufficiency                                            | Vitamin D insufficiency                                          | Gestational diabetes                          | Cohort studies                                  | NA    |
| Jayedi et al. 2018 <sup>142</sup>   | Selenium intake              | All-cause mortality      | 3  | 141,404 | 10,285                  | General population                                     | 40-80 (mean 53-67)      | Dietary Selenium                                                 | Dietary Selenium                                                 | All-cause mortality                           | Cohort studies                                  | 4-14  |
| Jayedi et al. 2019 <sup>122</sup>   | Calcium intake + supplements | Hypertension             | 8  | 248,398 | 30,838                  | General population                                     | 20-75                   | Dietary and supplementary calcium intake                         | Dietary and supplementary calcium intake                         | Hypertension                                  | Prospective cohort studies                      | 2-10  |
| Jiang et al. 2019 <sup>141</sup>    | β-carotene intake            | Cataract                 | 7  | 154,449 | NA                      | Men and women 40+, cases at baseline included          | 43-84                   | Dietary β-carotene intake                                        | Dietary β-carotene intake                                        | Age-related cataract                          | Prospective and non-longitudinal cohort         | 5-15  |
| Jiang et al. 2019 <sup>141</sup>    | Vitamin E intake             | Cataract                 | 6  | 42,147  | NA                      | Men and women 40+, cases at baseline included          | 43-84                   | Dietary Vitamin E intake                                         | Dietary Vitamin E intake                                         | Age-related cataract                          | Prospective and non-longitudinal cohort         | 5-15  |
| Jiang et al. 2019 <sup>141</sup>    | Vitamin C intake             | Cataract                 | 7  | 77,333  | NA                      | Men and women 40+, cases at baseline included          | 43-84                   | Dietary Vitamin C intake                                         | Dietary Vitamin C intake                                         | Age-related cataract                          | Prospective and non-longitudinal cohort         | 5-15  |
| Jin et al. 2012 <sup>137</sup>      | Total flavonoids intake      | Colorectal cancer        | 3  | 72,320  | 1,022                   | General population                                     | 45+ (NA in 2/3 studies) | Total flavonoids and 3-7 flavonoid subclasses, flavonoids intake | Total flavonoids and 3-7 flavonoid subclasses, flavonoids intake | Colorectal cancer, colorectal cancer risk     | Cohort studies                                  | 10-18 |
| Jin et al. 2012 <sup>137</sup>      | Isoflavonoes intake          | Colorectal cancer        | 1  | 310,291 | 431                     | General population                                     | 45-74                   | Dietary soy and isoflavonols intake                              | Dietary soy and isoflavonols intake                              | Colorectal cancer risk                        | Prospective cohort studies                      | 8     |
| Jin et al. 2012 <sup>137</sup>      | Flavonols intake             | Colorectal cancer        | 1  | 18,696  | 869                     | General population                                     | 55-69                   | Dietary flavonol, flavone and catechin intake                    | Dietary flavonol, flavone and catechin intake                    | Colorectal cancer risk                        | Case-cohort                                     | 13    |
| Kastorini et al. 2011 <sup>41</sup> | Mediterranean diet (intake)  | Systolic blood pressure  | 1  | 2,563   | NA                      | People without CVD risk factors                        | 20-90                   | Mediterranean food pattern score                                 | Mediterranean food pattern score                                 | Systolic blood pressure                       | Prospective cohort studies                      | 6     |
| Kastorini et al. 2011 <sup>41</sup> | Mediterranean diet (intake)  | Diastolic blood pressure | 1  | 2,563   | NA                      | People without CVD risk factors                        | 20-90                   | Mediterranean food pattern score                                 | Mediterranean food pattern score                                 | Diastolic blood pressure                      | Prospective cohort studies                      | 6     |
| Kastorini et al. 2011 <sup>41</sup> | Mediterranean diet (intake)  | High Density Lipoprotein | 1  | 2,563   | NA                      | People without CVD risk factors                        | 20-90                   | Mediterranean food pattern score                                 | Mediterranean food pattern score                                 | High Density Lipoprotein-Cholesterol          | Prospective cohort studies                      | 6     |
| Kastorini et al. 2011 <sup>41</sup> | Mediterranean diet (intake)  | Triglycerides            | 1  | 2,563   | NA                      | People without CVD risk factors                        | 20-90                   | Mediterranean food pattern score                                 | Mediterranean food pattern score                                 | Triglycerides                                 | Prospective cohort studies                      | 6     |

## Supplementary data

|                                           |                                 |                          |    |         |         |                                                                                                                                     |                    |                               |                               |                                                                                                                                                     |                                               |           |
|-------------------------------------------|---------------------------------|--------------------------|----|---------|---------|-------------------------------------------------------------------------------------------------------------------------------------|--------------------|-------------------------------|-------------------------------|-----------------------------------------------------------------------------------------------------------------------------------------------------|-----------------------------------------------|-----------|
| Leyvraz et al. 2018 <sup>25</sup>         | Low-sodium intake + status      | Systolic blood pressure  | 1  | 435     | NA      | Boys and girls                                                                                                                      | 4-18               | Sodium intake, urinary sodium | Sodium intake, urinary sodium | Systolic blood pressure                                                                                                                             | Prospective cohort studies                    | NA        |
| Leyvraz et al. 2018 <sup>25</sup>         | Low-sodium intake + status      | Diastolic blood pressure | 1  | 435     | NA      | Boys and girls                                                                                                                      | 4-18               | Sodium intake, urinary sodium | Sodium intake, urinary sodium | Diastolic blood pressure                                                                                                                            | Prospective cohort studies                    | NA        |
| Li et al. 2020 <sup>116</sup>             | Linoleic acid intake            | All-cause mortality      | 11 | 708,379 | 170,076 | Mostly general population; people with breast cancer or high CVD risk                                                               | 20-98 (mean 41-80) | Dietary linoleic acid intake  | Dietary linoleic acid intake  | All-cause mortality                                                                                                                                 | Prospective cohort studies                    | 5-30      |
| Li et al. 2020 <sup>116</sup>             | Linoleic acid intake            | Cardiovascular mortality | 14 | 793,131 | 50,786  | Mostly general population; people with high CVD risk or smokers                                                                     | mean 46-75         | Dietary linoleic acid intake  | Dietary linoleic acid intake  | CVD mortality (fatal CAD, myocardial infarction, ischemic heart disease, or stroke; death from CAD, stroke, or other CVD causes; and CVD mortality) | Prospective cohort studies                    | 6-30      |
| Mijatovic-Vukas et al. 2018 <sup>13</sup> | Mediterranean diet (intake)     | Gestational diabetes     | 4  | 23,488  | NA      | Pregnant women, women not pregnant at baseline but birth during follow-up, women with and without history of (gestational) diabetes | 24-44 (mean 28)    | Mediterranean diet            | Mediterranean diet            | Gestational Diabetes                                                                                                                                | Cohort studies, prospective multicentre study | 9 (3x NA) |
| Newberry et al. 2014 <sup>33</sup>        | Calcium intake                  | Pre-eclampsia            | 2  | 5,913   | 385     | Healthy pregnant women                                                                                                              | 30-40              | Calcium intake                | Calcium intake                | Preeclampsia                                                                                                                                        | Cohort studies                                | NA        |
| Newberry et al. 2014 <sup>33</sup>        | Calcium intake                  | High blood pressure      | 2  | 5,973   | 866     | Healthy pregnant women                                                                                                              | 30-40              | Calcium intake                | Calcium intake                | High blood pressure with or without proteinuria                                                                                                     | Cohort studies                                | NA        |
| Noto et al. 2013 <sup>133</sup>           | High-carbohydrate intake        | Cardiovascular mortality | 3  | 249,272 | 5,960   | People from Western countries, healthcare professionals. May not represent general population                                       | 30-75              | Carbohydrate-score            | Carbohydrate-score            | CVD mortality                                                                                                                                       | Cohort studies                                | 10-26     |
| Pan et al. 2012 <sup>19</sup>             | $\alpha$ -Linolenic acid intake | Cardiovascular disease   | 11 | 328,888 | 9,161   | General population                                                                                                                  | 20-84 (mean 41-71) | Dietary ALA intake            | Dietary ALA intake            | CVD (CHD, MI, IHD, CAD, stroke, CVD)                                                                                                                | Prospective cohort studies                    | 6-23      |
| Rosato et al. 2019 <sup>44</sup>          | Mediterranean diet (intake)     | Cardiovascular mortality | 4  | NA      | NA      | Free of previous cardiovascular events                                                                                              | NA                 | Mediterranean diet score      | Mediterranean diet score      | Cardiovascular mortality                                                                                                                            | Cohort studies                                | NA        |
| Rosato et al. 2019 <sup>44</sup>          | Mediterranean diet (intake)     | Cardiovascular disease   | 9  | NA      | NA      | Free of previous cardiovascular events                                                                                              | 20-90              | Mediterranean diet score      | Mediterranean diet score      | CVD                                                                                                                                                 | Cohort studies                                | 5-20      |
| Sartorius et al. 2018 <sup>135</sup>      | High-carbohydrate intake        | Obesity                  | 2  | 102,340 | NA      | Healthy and overweight / obese adults                                                                                               | NA                 | Carbohydrate intake           | Carbohydrate intake           | Obesity                                                                                                                                             | NA                                            | NA        |
| Schlesinger et al. 2019 <sup>16</sup>     | Fish intake                     | Weight gain              | 1  | 17,369  | 1,128   | General population                                                                                                                  | 24-69              | Fish intake                   | Fish intake                   | Weight gain per 100g/d, risk of /adiposity                                                                                                          | Prospective cohort studies                    | 2         |

## Supplementary data

|                                           |                             |                             |    |           |         |                                                                                                                |              |                                                                                                |                                                                                                |                                                                                                             |                                                                 |                |
|-------------------------------------------|-----------------------------|-----------------------------|----|-----------|---------|----------------------------------------------------------------------------------------------------------------|--------------|------------------------------------------------------------------------------------------------|------------------------------------------------------------------------------------------------|-------------------------------------------------------------------------------------------------------------|-----------------------------------------------------------------|----------------|
| Schwingshackl et al. 2017 <sup>129</sup>  | Fruit intake                | Hypertension                | 7  | 240,666   | 94,507  | Mostly general population                                                                                      | 20-95        | Fruit intake                                                                                   | Fruit intake                                                                                   | Hypertension                                                                                                | Cohort, case-cohort, nested case-control                        | 4-13           |
| Schwingshackl et al. 2017 <sup>129</sup>  | Vegetables intake           | Hypertension                | 8  | 242,210   | 94,772  | Mostly general population                                                                                      | 20-95        | Vegetable intake                                                                               | Vegetable intake                                                                               | Hypertension                                                                                                | Cohort, case-cohort, nested case-control                        | 3-13           |
| Schwingshackl et al. 2017 <sup>129</sup>  | Whole grain intake          | Hypertension                | 4  | 109,615   | 28,069  | Mostly general population                                                                                      | 40-86        | Whole grain intake (self-reported)                                                             | Whole grain intake (self-reported)                                                             | Hypertension (systolic blood pressure $\geq$ 140mmHg or diastolic blood pressure $\geq$ 90 mmHg)            | Prospective cohort studies                                      | 9-18           |
| Schwingshackl et al. 2018 <sup>132</sup>  | Diet quality (intake)       | Type 2 diabetes             | 10 | 605,939   | NA      | General population                                                                                             | 24-84        | Diets of highest quality (assessed by HEI, AHEI, DASH)                                         | Diets of lowest quality (assessed by HEI, AHEI, DASH)                                          | Type 2 diabetes mellitus                                                                                    | Prospective cohort studies                                      | 8-24           |
| Schwingshackl et al. 2018 <sup>132</sup>  | Diet quality (intake)       | All-cause mortality         | 13 | 1,568,643 | NA      | General population                                                                                             | 18-90        | Diets of highest quality (assessed by HEI, AHEI, DASH)                                         | Diets of lowest quality (assessed by HEI, AHEI, DASH)                                          | All-cause mortality                                                                                         | Prospective cohort studies                                      | 6-22           |
| Seidelmann et al. 2018 <sup>134</sup>     | High carb intake            | All-cause mortality         | 6  | 287,644   | 30,942  | General population; people with diabetes; people with cardiovascular disease                                   | 20-86        | Carbohydrate consumption (>70%)                                                                | Carbohydrate consumption (<40%)                                                                | All-cause mortality, all-cause death                                                                        | Cohort studies                                                  | 5-26           |
| Soedamah-Muthu et al. 2012 <sup>149</sup> | Fermented milk intake       | Hypertension                | 4  | 7,641     | 2,475   | General population; excluding children, adolescents and pregnant women, patients, and hypertensive populations | NA (mean 54) | Mean total fermented dairy intake (buttermilk, yogurt, cheese, curds, sour cream) of 84-201g/d | Mean total fermented dairy intake (buttermilk, yogurt, cheese, curds, sour cream) of 84-201g/d | Hypertension (defined as SBP $\geq$ 140 mmHg, or DBP $\geq$ 90 mmHg, or use of antihypertensive medication) | Prospective cohort studies                                      | 5-10 (Mean: 7) |
| Soltani et al. 2019 <sup>144</sup>        | Mediterranean diet (intake) | All-cause mortality         | 26 | 1,624,280 | 218,928 | Healthy population                                                                                             | 16-88        | Mediterranean diet score                                                                       | Mediterranean diet score                                                                       | All-cause mortality                                                                                         | Prospective cohort studies                                      | 4-32           |
| Tous et al. 2020 <sup>7</sup>             | Vitamin D status            | Preterm birth               | 19 | 24,498    | 3,130   | Adult healthy pregnant women                                                                                   | NA           | 25(OH) in maternal or cord blood                                                               | 25(OH) in maternal or cord blood                                                               | Preterm birth                                                                                               | Cohort studies                                                  | NA             |
| Tous et al. 2020 <sup>7</sup>             | Vitamin D status            | Birth length                | 7  | 6,929     | NA      | Adult healthy pregnant women                                                                                   | NA           | 25(OH) in maternal or cord blood                                                               | 25(OH) in maternal or cord blood                                                               | Birth length                                                                                                | Cohort studies                                                  | NA             |
| Tous et al. 2020 <sup>7</sup>             | Vitamin D status            | Birth weight                | 14 | 15,972    | NA      | Adult healthy pregnant women                                                                                   | NA           | 25(OH) in maternal or cord blood                                                               | 25(OH) in maternal or cord blood                                                               | Birth weight                                                                                                | Cohort studies                                                  | NA             |
| Tous et al. 2020 <sup>7</sup>             | Vitamin D status            | Head circumference at birth | 7  | 5,979     | NA      | Adult healthy pregnant women                                                                                   | NA           | 25(OH) in maternal or cord blood                                                               | 25(OH) in maternal or cord blood                                                               | Birth head circumference                                                                                    | Cohort studies                                                  | NA             |
| Vinceti et al. 2018 <sup>14</sup>         | Selenium status             | Cancer                      | 7  | 76,239    | 1,940   | General population; no history of cancer (2x); not institutionalised and bed-fast (1x)                         | 15-74        | Serum and plasma selenium                                                                      | Serum and plasma selenium                                                                      | Any cancer, stomach / rectal / lung / colon and bladder cancer                                              | Cohort / subcohort controlled cohort study, Nested case-control | 5-20           |
| Vinceti et al. 2018 <sup>14</sup>         | Selenium intake             | Cancer mortality            | 1  | 133,957   | 2,603   | Men and women without history of cancer                                                                        | 40-74        | Selenium intake                                                                                | Selenium intake, serum and plasma selenium                                                     | Cancer mortality                                                                                            | Cohort studies                                                  | 8-14           |

## Supplementary data

|                                   |                                 |                                  |    |         |        |                                                                  |                          |                                                                                 |                                                     |                                                      |                                                                |      |
|-----------------------------------|---------------------------------|----------------------------------|----|---------|--------|------------------------------------------------------------------|--------------------------|---------------------------------------------------------------------------------|-----------------------------------------------------|------------------------------------------------------|----------------------------------------------------------------|------|
| Vinceti et al. 2018 <sup>14</sup> | Selenium supplements            | Colorectal cancer                | 1  | 54,208  | 990    | Men and women without history of cancer                          | 50-64                    | Selenium supplements                                                            | Selenium supplements                                | Colorectal cancer,                                   | Cohort studies                                                 | 13   |
| Wan et al. 2017 <sup>115</sup>    | Omega-3 intake                  | All-cause mortality              | 6  | 430,579 | 26,093 | General population                                               | 35-79                    | Fish, dietary long-chain Omega-3 PUFA / EPA + DHA                               | Fish, dietary long-chain Omega-3 PUFA / EPA + DHA   | All-cause mortality, total death                     | Prospective cohort studies                                     | 6-15 |
| Wei et al. 2018 <sup>20</sup>     | $\alpha$ -Linolenic acid intake | Coronary heart disease mortality | 9  | 279,108 | NA     | General population without history of CHD                        | 35-75 (mean 56-71)       | Dietary ALA intake                                                              | Dietary ALA intake                                  | Fatal CHD (CHD death, CHD mortality)                 | Prospective cohort studies                                     | 5-12 |
| Wei et al. 2018 <sup>20</sup>     | $\alpha$ -Linolenic acid intake | Coronary heart disease           | 13 | 421,485 | NA     | General population without history of CHD                        | 35-75 (mean 42-71)       | Dietary ALA intake                                                              | Dietary ALA intake                                  | Composite CHD (total CHD, fatal or non-fatal)        | Prospective cohort studies                                     | 5-23 |
| Wolf et al. 2017 <sup>39</sup>    | Multivitamin supplements        | Preterm birth                    | 4  | 42,592  | 2,280  | Pregnant women                                                   | NA                       | Multivitamin supplement (3 or more vitamins or minerals in tablets or capsules) | No vitamin use / less than 3 vitamins               | Preterm birth (<37 weeks of gestational age)         | Prospective cohort studies, Cohort studies (2 matched cohorts) | 3-10 |
| Wolf et al. 2017 <sup>39</sup>    | Multivitamin supplements        | Low birth weight                 | 2  | 7,498   | 452    | Pregnant women                                                   | NA                       | Multivitamin supplement (3 or more vitamins or minerals in tablets or capsules) | No vitamin use / less than 3 vitamins               | Low birth weight (<2500 g)                           | Prospective cohort studies, Cohort studies (2 matched cohorts) | 3-10 |
| Wolf et al. 2017 <sup>39</sup>    | Multivitamin supplements        | Small gestational age            | 3  | 36,965  | 1,413  | Pregnant women                                                   | NA                       | Multivitamin supplement (3 or more vitamins or minerals in tablets or capsules) | No vitamin use / less than 3 vitamins               | Small gestational weight (birthweight <10th centile) | Prospective cohort studies                                     | 6-10 |
| Xiang et al. 2019 <sup>143</sup>  | Selenium status                 | Cardiovascular mortality         | 3  | 16,928  | 4,431  | General population                                               | 20+ (mean 67-78)         | Circulating Selenium (serum / plasma)                                           | Circulating Selenium (serum / plasma)               | Cardiovascular mortality                             | Prospective cohort studies, nested case-control                | 7-14 |
| Ye et al. 2012 <sup>139</sup>     | Whole grain intake              | Body weight                      | 3  | 119,054 | NA     | Mostly general population (male and female health professionals) | 38-84                    | Whole grain intake (self-reported)                                              | Whole grain intake (self-reported)                  | Weight gain                                          | Prospective cohort studies                                     | 8-13 |
| Yuan et al. 2019 <sup>8</sup>     | Vitamin D status                | Pre-eclampsia                    | 15 | 29,101  | 1,909  | Pregnant women                                                   | NA                       | Maternal serum 25-hydroxyvitamin D concentration                                | Maternal serum 25-hydroxyvitamin D concentration    | Pre-eclampsia                                        | Cohort studies, nested case-control                            | NA   |
| Zhang et al. 2015 <sup>31</sup>   | Vitamin D intake                | Lung cancer                      | 3  | 135,244 | 3,004  | General population; smokers; postmenopausal women                | NA                       | Vitamin D intake                                                                | Vitamin D intake                                    | Lung cancer incidence or mortality                   | Prospective cohort studies, nested case-control                | NA   |
| Zhang et al. 2016a <sup>43</sup>  | Selenium status                 | Cardiovascular disease           | 14 | 34,109  | 3,749  | Population-based, Physicians                                     | 20-90                    | Circulating Selenium (serum / plasma / erythrocyte)                             | Circulating Selenium (serum / plasma / erythrocyte) | Cardiovascular disease                               | Cohort studies, nested case-control                            | 3-15 |
| Zhang et al. 2016b <sup>147</sup> | Omega-3 intake                  | Dementia                         | 2  | 6,237   | 286    | Elderly general population                                       | 65-94 (1x), mean 55 (1x) | Dietary Omega-3 PUFA intake                                                     | Dietary Omega-3 PUFA intake                         | Alzheimer disease                                    | Prospective cohort studies                                     | 4-6  |
| Zhu et al. 2019 <sup>22</sup>     | Polyunsaturated fat intake      | Cardiovascular disease           | 30 | 982,336 | NA     | General population                                               | 30-89                    | Dietary PUFA intake; weighted food record (2x)                                  | Dietary PUFA intake; weighted food record (2x)      | CVD events, CVD mortality                            | Prospective cohort studies                                     | 5-30 |

### Supplementary data

|                               |                |                        |    |           |    |                           |                    |                   |                   |                        |                            |      |
|-------------------------------|----------------|------------------------|----|-----------|----|---------------------------|--------------------|-------------------|-------------------|------------------------|----------------------------|------|
| Zhu et al. 2019 <sup>22</sup> | Low-fat intake | Cardiovascular disease | 32 | 1,009,839 | NA | Mostly general population | 30-75 (mean 53-75) | Dietary total fat | Dietary total fat | Cardiovascular disease | Prospective cohort studies | 4-32 |
|-------------------------------|----------------|------------------------|----|-----------|----|---------------------------|--------------------|-------------------|-------------------|------------------------|----------------------------|------|

AHEI: Alternate Healthy Eating Index; ALA:  $\alpha$ -Linolenic acid; CAD: coronary artery disease; CHD: coronary heart disease; COPD: chronic obstructive pulmonary disease; CVD: cardiovascular disease; d: day; DASH: Dietary Approaches to Stop Hypertension; DBP: diastolic blood pressure; DHA: docosahexaenoic acid; EPA: eicosapentaenoic acid; g: gram; HEI: Healthy Eating Index; IHD: ischemic heart disease; MCI: mild cognitive impairment; MI: myocardial infarction; mmHg: millimetre of mercury; NA: not applicable/assessed; PUFA: polyunsaturated fatty acid; SBP: systolic blood pressure.

Supplementary data

Supplementary Table 12: Study quality (risk of bias) and certainty of evidence of the included bodies of evidence from cohort studies.

| Reference                           | Exposure (as defined by the authors) | Outcome (as defined by the authors) | Studies, n | Sample size, n | Cases, n | Certainty of evidence | Study quality/ risk of bias                                                                                                                                                                                                                       |
|-------------------------------------|--------------------------------------|-------------------------------------|------------|----------------|----------|-----------------------|---------------------------------------------------------------------------------------------------------------------------------------------------------------------------------------------------------------------------------------------------|
| Aburto et al. 2013 <sup>24</sup>    | Low-sodium intake                    | All-cause mortality                 | 2          | 22,550         | NA       | NA                    | Selection of participants (0/2),<br>Blinding of participants and personnel (0/2),<br>Blinding of outcome assessment (1/2),<br>Incomplete outcome date (1/2),<br>Selective reporting (2/2),<br>Defining exposure (0/2),<br>Other confounding (2/2) |
| Aburto et al. 2013 <sup>24</sup>    | Low-sodium intake                    | Cardiovascular mortality            | 3          | 81,280         | NA       | NA                    | Selection of participants (1/3),<br>Blinding of participants and personnel (0/3),<br>Blinding of outcome assessment (2/3),<br>Incomplete outcome date (2/3),<br>Selective reporting (3/3),<br>Defining exposure (0/3),<br>Other confounding (3/3) |
| Aburto et al. 2013 <sup>24</sup>    | Low-sodium intake                    | Cardiovascular disease              | 3          | 81,280         | NA       | NA                    | Selection of participants (1/3),<br>Blinding of participants and personnel (0/3),<br>Blinding of outcome assessment (2/3),<br>Incomplete outcome date (2/3),<br>Selective reporting (3/3),<br>Defining exposure (0/3),<br>Other confounding (3/3) |
| Aune et al. 2018 <sup>26</sup>      | Vitamin C intake                     | Cardiovascular diseases             | 9          | 246,711        | 7,986    | NA                    | NOS: majority of the included studies were in the subgroup with 7-9 points                                                                                                                                                                        |
| Aune et al. 2018 <sup>26</sup>      | Vitamin C intake                     | Cardiovascular mortality            | 9          | NA             | NA       | NA                    | NOS: majority of the included studies were in the subgroup with 7-9 points                                                                                                                                                                        |
| Aune et al. 2018 <sup>26</sup>      | Vitamin C intake                     | All-cause mortality                 | 16         | 315,214        | 38,079   | NA                    | NOS: majority of the included studies were in the subgroup with 7-9 points                                                                                                                                                                        |
| Aune et al. 2018 <sup>26</sup>      | β-carotene intake                    | All-cause mortality                 | 8          | 142,798        | 11,729   | NA                    | NOS: majority of the included studies were in the subgroup with 7-9 points                                                                                                                                                                        |
| Aune et al. 2018 <sup>26</sup>      | Vitamin E intake                     | All-cause mortality                 | 9          | 229,830        | 15,321   | NA                    | NOS: majority of the included studies were in the subgroup with 7-9 points                                                                                                                                                                        |
| Aune et al. 2018 <sup>26</sup>      | Vitamin C intake                     | All-cause mortality                 | 16         | 315,214        | 38,079   | NA                    | NOS: majority of the included studies were in the subgroup with 7-9 points                                                                                                                                                                        |
| Aune et al. 2011 <sup>150</sup>     | Fibre intake                         | Colorectal cancer                   | 19         | 1,797,670      | 14,794   | NA                    | NA                                                                                                                                                                                                                                                |
| Ben et al. 2014 <sup>46</sup>       | Fibre intake                         | Colorectal adenoma                  | 4          | 78,348         | 2,402    | NA                    | NOS: 7.5                                                                                                                                                                                                                                          |
| Blencowe et al. 2010 <sup>124</sup> | Folate supplements                   | Neural tube defect                  | 3          | NA             | NA       | NA                    | "Consistent, all studies showing benefit. Very different study sites."                                                                                                                                                                            |
| Chia et al. 2019 <sup>11</sup>      | Healthy diet (intake)                | Preterm birth                       | 5          | 113,703        | NA       | NA                    | NOS: 8                                                                                                                                                                                                                                            |
| Chia et al. 2019 <sup>11</sup>      | Healthy diet (intake)                | Small gestational age               | 8          | 75,446         | NA       | NA                    | NOS: 8.3                                                                                                                                                                                                                                          |

## Supplementary data

|                                          |                              |                                  |    |         |                         |                       |                                                                                                                                                                                                                                                    |
|------------------------------------------|------------------------------|----------------------------------|----|---------|-------------------------|-----------------------|----------------------------------------------------------------------------------------------------------------------------------------------------------------------------------------------------------------------------------------------------|
| Chia et al. 2019 <sup>11</sup>           | Healthy diet (intake)        | Birth weight                     | 12 | 24,950  | NA                      | NA                    | NOS: 7.6                                                                                                                                                                                                                                           |
| Chowdhury et al. 2014a <sup>18</sup>     | Omega-3 intake               | Coronary heart disease mortality | NA | 104,681 | 1,483                   | NA                    | NA                                                                                                                                                                                                                                                 |
| Chowdhury et al. 2014a <sup>18</sup>     | Omega-3 intake               | Coronary heart disease           | 16 | 422,786 | 9,089                   | NA                    | NOS: 8.2                                                                                                                                                                                                                                           |
| Chowdhury et al. 2014a <sup>18</sup>     | Omega-6 intake               | Coronary heart disease           | 8  | 206,376 | 8,155                   | NA                    | NOS: 7.9                                                                                                                                                                                                                                           |
| Chowdhury et al. 2014b <sup>119</sup>    | Vitamin D status             | All-cause mortality              | 68 | 840,908 | 64,636                  | NA                    | NOS: 7.3                                                                                                                                                                                                                                           |
| Chowdhury et al. 2014b <sup>119</sup>    | Vitamin D status             | Cardiovascular mortality         | 29 | 101,649 | 10,203                  | NA                    | NOS: 7.6                                                                                                                                                                                                                                           |
| de Souza et al. 2015 <sup>36</sup>       | Low saturated fat intake     | All-cause mortality              | 5  | 99,906  | 14,090                  | Very low              | NOS: 7.2                                                                                                                                                                                                                                           |
| de Souza et al. 2015 <sup>36</sup>       | Low saturated fat intake     | Cardiovascular mortality         | 3  | 90,501  | 3,792                   | Very low              | NOS: 6.7                                                                                                                                                                                                                                           |
| de Souza et al. 2015 <sup>36</sup>       | Low saturated fat intake     | Coronary heart disease           | 12 | 267,416 | 6,383                   | Very low              | NOS: 7.7                                                                                                                                                                                                                                           |
| Doets et al. 2013 <sup>145</sup>         | Vitamin B12 intake           | Dementia                         | 3  | 5,254   | 431                     | NA                    | low (1x), moderate or high (2x) (tool / scale NA)                                                                                                                                                                                                  |
| Feng et al. 2017 <sup>28</sup>           | Vitamin D status             | Hip fracture                     | 11 | 34,557  | 2,996                   | NA                    | NOS: 7.3                                                                                                                                                                                                                                           |
| Feng et al. 2017 <sup>28</sup>           | Vitamin D status             | Any fracture                     | 11 | 30,489  | 4,279                   | NA                    | NOS: 7.3                                                                                                                                                                                                                                           |
| Feng et al. 2015 <sup>125</sup>          | Folate supplements           | Congenital heart defect          | 1  | 6,112   | NA                      | NA                    | NA                                                                                                                                                                                                                                                 |
| Fernandez-Cao et al. 2019 <sup>127</sup> | Zinc supplements             | Type 2 diabetes                  | 2  | 258,139 | 17,806                  | NA                    | STROBE: 94% (max. 100%)                                                                                                                                                                                                                            |
| Goodwill et al. 2017 <sup>9</sup>        | Vitamin D status             | Dementia / MCI                   | 14 | 30,452  | NA                      | NA                    | modified NOS: Participants (3/14),<br>Sample size / power calculation (0/14),<br>Confounders (13/14),<br>Statistical analyses (11/14),<br>Missing data (1/14),<br>Appropriate outcome measurement (14/14),<br>Objective measure of outcome (14/14) |
| Han et al. 2019 <sup>120</sup>           | Vitamin D status             | Cancer mortality                 | 16 | 10,794  | 8,729                   | NA                    | NOS: 7                                                                                                                                                                                                                                             |
| Han et al. 2019 <sup>120</sup>           | Vitamin D status             | Cancer incidence                 | 8  | 70,018  | 7,511                   | NA                    | NOS: 6.8                                                                                                                                                                                                                                           |
| Hossain et al. 2019 <sup>30</sup>        | Vitamin D supplements        | Breast cancer                    | 2  | 37,707  | 1,611 (1 study unclear) | NA                    | modified quality score: 6.5 (max. 8)                                                                                                                                                                                                               |
| Hu et al. 2018 <sup>5</sup>              | Vitamin D status             | Gestational diabetes             | 13 | 12,958  | 1,358                   | NA                    | NA                                                                                                                                                                                                                                                 |
| Jayedi et al. 2018 <sup>142</sup>        | Selenium intake              | All-cause mortality              | 3  | 141,404 | 10,285                  | NA                    | NOS: 7.7                                                                                                                                                                                                                                           |
| Jayedi et al. 2019 <sup>122</sup>        | Calcium intake + supplements | Hypertension                     | 8  | 248,398 | 30,838                  | Moderate (NutriGrade) | NOS: 7.8                                                                                                                                                                                                                                           |



## Supplementary data

|                                           |                             |                          |    |         |         |    |                                                                                                                                                           |
|-------------------------------------------|-----------------------------|--------------------------|----|---------|---------|----|-----------------------------------------------------------------------------------------------------------------------------------------------------------|
| Jiang et al. 2019 <sup>441</sup>          | β-carotene intake           | Cataract                 | 7  | 154,449 | NA      | NA | NOS: 6                                                                                                                                                    |
| Jiang et al. 2019 <sup>441</sup>          | Vitamin E intake            | Cataract                 | 6  | 42,147  | NA      | NA | NOS: 6.2                                                                                                                                                  |
| Jiang et al. 2019 <sup>441</sup>          | Vitamin C intake            | Cataract                 | 7  | 77,333  | NA      | NA | NOS: 6.1                                                                                                                                                  |
| Jin et al. 2012 <sup>137</sup>            | Total flavonoids intake     | Colorectal cancer        | 3  | 72,320  | 1,022   | NA | NOS: 13/16                                                                                                                                                |
| Jin et al. 2012 <sup>137</sup>            | Isoflavonoes intake         | Colorectal cancer        | 1  | 310,291 | 431     | NA | NOS: 13/16                                                                                                                                                |
| Jin et al. 2012 <sup>137</sup>            | Flavonols intake            | Colorectal cancer        | 1  | 18,696  | 869     | NA | NOS: 12/16                                                                                                                                                |
| Kastorini et al. 2011 <sup>41</sup>       | Mediterranean diet (intake) | Systolic blood pressure  | 1  | 2,563   | NA      | NA | NA                                                                                                                                                        |
| Kastorini et al. 2011 <sup>41</sup>       | Mediterranean diet (intake) | Diastolic blood pressure | 1  | 2,563   | NA      | NA | NA                                                                                                                                                        |
| Kastorini et al. 2011 <sup>41</sup>       | Mediterranean diet (intake) | High Density Lipoprotein | 1  | 2,563   | NA      | NA | NA                                                                                                                                                        |
| Kastorini et al. 2011 <sup>41</sup>       | Mediterranean diet (intake) | Triglycerides            | 1  | 2,563   | NA      | NA | NA                                                                                                                                                        |
| Leyvraz et al. 2018 <sup>25</sup>         | Low-sodium intake + status  | Systolic blood pressure  | 1  | 435     | NA      | NA | Quality of sodium intake measurement (high),<br>Quality of blood pressure measurement (high),<br>External validity (high),<br>Quality of reporting (high) |
| Leyvraz et al. 2018 <sup>25</sup>         | Low-sodium intake + status  | Diastolic blood pressure | 1  | 435     | NA      | NA | Quality of sodium intake measurement (high),<br>Quality of blood pressure measurement (high),<br>External validity (high),<br>Quality of reporting (high) |
| Li et al. 2020 <sup>116</sup>             | Linoleic acid intake        | All-cause mortality      | 11 | 708,379 | 170,076 | NA | NOS: 7.2                                                                                                                                                  |
| Li et al. 2020 <sup>116</sup>             | Linoleic acid intake        | Cardiovascular mortality | 14 | 793,131 | 50,786  | NA | NOS: 8                                                                                                                                                    |
| Mijatovic-Vukas et al. 2018 <sup>13</sup> | Mediterranean diet (intake) | Gestational diabetes     | 4  | 23,488  | NA      | NA | Modified quality assessment & risk of bias form obtained from the Evidence Analysis Manual (American Dietetic Association): positive quality ranking      |
| Newberry et al. 2014 <sup>33</sup>        | Calcium intake              | Pre-eclampsia            | 2  | 5,913   | 385     | NA | Study quality: B                                                                                                                                          |
| Newberry et al. 2014 <sup>33</sup>        | Calcium intake              | High blood pressure      | 2  | 5,973   | 866     | NA | Study quality: B                                                                                                                                          |
| Noto et al. 2013 <sup>133</sup>           | High-carbohydrate intake    | Cardiovascular mortality | 3  | 249,272 | 5,960   | NA | NOS: 8.3                                                                                                                                                  |
| Pan et al. 2012 <sup>19</sup>             | α-Linolenic acid intake     | Cardiovascular disease   | 11 | 328,888 | 9,161   | NA | NA                                                                                                                                                        |
| Rosato et al. 2019 <sup>44</sup>          | Mediterranean diet (intake) | Cardiovascular mortality | 4  | NA      | NA      | NA | NA                                                                                                                                                        |
| Rosato et al. 2019 <sup>44</sup>          | Mediterranean diet (intake) | Cardiovascular disease   | 9  | NA      | NA      | NA | NA                                                                                                                                                        |

## Supplementary data

|                                           |                                 |                                  |    |           |         |                       |                                                                                                                                                                                                                                                                                                            |
|-------------------------------------------|---------------------------------|----------------------------------|----|-----------|---------|-----------------------|------------------------------------------------------------------------------------------------------------------------------------------------------------------------------------------------------------------------------------------------------------------------------------------------------------|
| Sartorius et al. 2018 <sup>135</sup>      | High-carbohydrate intake        | Obesity                          | 2  | 102,340   | NA      | NA                    | Risk of Bias Tool for Prevalence Studies: 7.5                                                                                                                                                                                                                                                              |
| Schlesinger et al. 2019 <sup>16</sup>     | Fish intake                     | Weight gain                      | 1  | 17,369    | 1,128   | Very low (NutriGrade) | NA                                                                                                                                                                                                                                                                                                         |
| Schwingshackl et al. 2017 <sup>129</sup>  | Fruit intake                    | Hypertension                     | 7  | 240,666   | 94,507  | NA                    | NA                                                                                                                                                                                                                                                                                                         |
| Schwingshackl et al. 2017 <sup>129</sup>  | Vegetables intake               | Hypertension                     | 8  | 242,210   | 94,772  | NA                    | NA                                                                                                                                                                                                                                                                                                         |
| Schwingshackl et al. 2017 <sup>129</sup>  | Whole grain intake              | Hypertension                     | 4  | 109,615   | 28,069  | NA                    | NA                                                                                                                                                                                                                                                                                                         |
| Schwingshackl et al. 2018 <sup>132</sup>  | Diet quality (intake)           | Type 2 diabetes                  | 10 | 605,939   | NA      | NA                    | NOS: 7.5                                                                                                                                                                                                                                                                                                   |
| Schwingshackl et al. 2018 <sup>132</sup>  | Diet quality (intake)           | All-cause mortality              | 13 | 1,568,643 | NA      | NA                    | NOS: 7.2                                                                                                                                                                                                                                                                                                   |
| Seidelmann et al. 2018 <sup>134</sup>     | High-carbohydrate intake        | All-cause mortality              | 6  | 287,644   | 30,942  | NA                    | NA                                                                                                                                                                                                                                                                                                         |
| Soedamah-Muthu et al. 2012 <sup>149</sup> | Fermented milk intake           | Hypertension                     | 4  | 7,641     | 2,475   | NA                    | NA                                                                                                                                                                                                                                                                                                         |
| Soltani et al. 2019 <sup>144</sup>        | Mediterranean diet (intake)     | All-cause mortality              | 26 | 1,624,280 | 218,928 | Low                   | ROBINS-I tool: Bias due to confounding (13/26), Bias in selection of participants (17/23), Classification of intervention (0/23), Deviations from intended interventions (26/26), Missing data (13/26), Bias in measurement of outcomes (26/26), Selection of reported result (26/26), Overall bias (1/26) |
| Tous et al. 2020 <sup>7</sup>             | Vitamin D status                | Preterm birth                    | 19 | 24,498    | 3,130   | NA                    | STROBE: 16.6 (max. 22, high = 17+)                                                                                                                                                                                                                                                                         |
| Tous et al. 2020 <sup>7</sup>             | Vitamin D status                | Birth length                     | 7  | 6,929     | NA      | NA                    | STROBE: 17 (max. 22, high = 17+)                                                                                                                                                                                                                                                                           |
| Tous et al. 2020 <sup>7</sup>             | Vitamin D status                | Birth weight                     | 14 | 15,972    | NA      | NA                    | STROBE: 16.9 (max. 22, high = 17+)                                                                                                                                                                                                                                                                         |
| Tous et al. 2020 <sup>7</sup>             | Vitamin D status                | Head circumference at birth      | 7  | 5,979     | NA      | NA                    | STROBE: 17 (max. 22, high = 17+)                                                                                                                                                                                                                                                                           |
| Vinceti et al. 2018 <sup>14</sup>         | Selenium status                 | Cancer                           | 7  | 76,239    | 1,940   | Very low              | NOS: 8                                                                                                                                                                                                                                                                                                     |
| Vinceti et al. 2018 <sup>14</sup>         | Selenium intake                 | Cancer mortality                 | 1  | 133,957   | 2,603   | NA                    | NA                                                                                                                                                                                                                                                                                                         |
| Vinceti et al. 2018 <sup>14</sup>         | Selenium supplements            | Colorectal cancer                | 1  | 54,208    | 990     | NA                    | NA                                                                                                                                                                                                                                                                                                         |
| Wan et al. 2017 <sup>115</sup>            | Omega-3 intake                  | All-cause mortality              | 6  | 430,579   | 26,093  | NA                    | NOS: 8                                                                                                                                                                                                                                                                                                     |
| Wei et al. 2018 <sup>20</sup>             | $\alpha$ -Linolenic acid intake | Coronary heart disease mortality | 9  | 279,108   | NA      | NA                    | NOS: 7.1                                                                                                                                                                                                                                                                                                   |
| Wei et al. 2018 <sup>20</sup>             | $\alpha$ -Linolenic acid intake | Coronary heart disease           | 13 | 421,485   | NA      | NA                    | NOS: 7.2                                                                                                                                                                                                                                                                                                   |
| Wolf et al. 2017 <sup>39</sup>            | Multivitamin supplements        | Preterm birth                    | 4  | 42,592    | 2,280   | Very low              | NOS: Risk of bias: Low                                                                                                                                                                                                                                                                                     |

## Supplementary data

|                                   |                            |                          |    |           |       |          |                                         |
|-----------------------------------|----------------------------|--------------------------|----|-----------|-------|----------|-----------------------------------------|
| Wolf et al. 2017 <sup>39</sup>    | Multivitamin supplements   | Low birth weight         | 2  | 7,498     | 452   | Very low | NOS: Risk of bias: Low                  |
| Wolf et al. 2017 <sup>39</sup>    | Multivitamin supplements   | Small gestational age    | 3  | 36,965    | 1,413 | Very low | NOS: Risk of bias: Low                  |
| Xiang et al. 2019 <sup>143</sup>  | Selenium status            | Cardiovascular mortality | 3  | 16,928    | 4,431 | NA       | NOS: 7.7                                |
| Ye et al. 2012 <sup>139</sup>     | Whole grain intake         | Body weight              | 3  | 119,054   | NA    | NA       | NA                                      |
| Yuan et al. 2019 <sup>8</sup>     | Vitamin D status           | Pre-eclampsia            | 15 | 29,101    | 1,909 | NA       | NA                                      |
| Zhang et al. 2015 <sup>31</sup>   | Vitamin D intake           | Lung cancer              | 3  | 135,244   | 3,004 | NA       | NOS: high (all studies 6 or more stars) |
| Zhang et al. 2016a <sup>43</sup>  | Selenium status            | Cardiovascular disease   | 14 | 34,109    | 3,749 | NA       | NA                                      |
| Zhang et al. 2016b <sup>147</sup> | Omega-3 intake             | Dementia                 | 2  | 6,237     | 286   | NA       | NOS: 8.5                                |
| Zhu et al. 2019 <sup>22</sup>     | Polyunsaturated fat intake | Cardiovascular disease   | 30 | 982,336   | NA    | NA       | NA                                      |
| Zhu et al. 2019 <sup>22</sup>     | Low-fat intake             | Cardiovascular disease   | 32 | 1,009,839 | NA    | NA       | NA                                      |

MCI: mild cognitive impairment; NA: not applicable/assessed; NOS: Newcastle-Ottawa-Scale; ROBINS-I: Risk Of Bias In Non-randomised Studies - of Interventions; STROBE: Strengthening the Reporting of Observational studies in Epidemiology.

## Supplementary data

Supplementary Table 13: Population (P), Intervention/Exposure (I/E), Comparator (C), Outcome (O) matching similarities for all identified diet-disease associations.

| Bodies of evidence from randomized controlled trials (Cochrane Reviews) |                                                                |                                     | Bodies of evidence from cohort studies |                                      |                                     | PI/ECO similarities   |                         |            |         |         |
|-------------------------------------------------------------------------|----------------------------------------------------------------|-------------------------------------|----------------------------------------|--------------------------------------|-------------------------------------|-----------------------|-------------------------|------------|---------|---------|
| Reference                                                               | Intervention (as defined by the authors)                       | Outcome (as defined by the authors) | Reference                              | Exposure (as defined by the authors) | Outcome (as defined by the authors) | Patients / population | Intervention / Exposure | Comparator | Outcome | Overall |
| Abdelhamid et al. 2018a <sup>15</sup>                                   | Omega-3 intake + supplements                                   | Cardiovascular mortality            | Chowdhury et al. 2014a <sup>18</sup>   | Omega-3 intake                       | Coronary heart disease mortality    | 3                     | 2                       | 2          | 2       | 3       |
| Abdelhamid et al. 2018a <sup>15</sup>                                   | Omega-3 intake + supplements                                   | Cardiovascular disease              | Chowdhury et al. 2014a <sup>18</sup>   | Omega-3 intake                       | Coronary heart disease              | 2                     | 2                       | 2          | 2       | 2       |
| Abdelhamid et al. 2018a <sup>15</sup>                                   | $\alpha$ -Linolenic acid intake (Supplementary/enriched foods) | Cardiovascular disease              | Pan et al. 2012 <sup>19</sup>          | $\alpha$ -Linolenic acid intake      | Cardiovascular disease              | 2                     | 2                       | 2          | 1       | 2       |
| Abdelhamid et al. 2018a <sup>15</sup>                                   | Omega-3 intake + supplements                                   | Body weight                         | Schlesinger et al. 2019 <sup>16</sup>  | Fish intake                          | Weight gain                         | 3                     | 2                       | 2          | 1       | 3       |
| Abdelhamid et al. 2018a <sup>15</sup>                                   | Omega-3 intake + supplements                                   | All-cause mortality                 | Wan et al. 2017 <sup>115</sup>         | Omega-3 intake                       | All-cause mortality                 | 2                     | 2                       | 2          | 1       | 2       |
| Abdelhamid et al. 2018a <sup>15</sup>                                   | $\alpha$ -Linolenic acid intake (Supplementary/enriched foods) | Cardiovascular mortality            | Wei et al. 2018 <sup>20</sup>          | $\alpha$ -Linolenic acid intake      | Coronary heart disease mortality    | 2                     | 2                       | 2          | 2       | 2       |
| Abdelhamid et al. 2018a <sup>15</sup>                                   | $\alpha$ -Linolenic acid intake (Supplementary/enriched foods) | Coronary heart disease              | Wei et al. 2018 <sup>20</sup>          | $\alpha$ -Linolenic acid intake      | Coronary heart disease              | 2                     | 2                       | 2          | 1       | 2       |
| Abdelhamid et al. 2018b <sup>21</sup>                                   | Polyunsaturated fat intake + supplements                       | All-cause mortality                 | Li et al. 2020 <sup>116</sup>          | Omega-3 intake                       | All-cause mortality                 | 2                     | 2                       | 2          | 1       | 2       |
| Abdelhamid et al. 2018b <sup>21</sup>                                   | Polyunsaturated fat intake + supplements                       | Coronary heart disease              | Chowdhury et al. 2014a <sup>18</sup>   | Omega-6 intake                       | Coronary heart disease              | 2                     | 2                       | 2          | 1       | 2       |
| Abdelhamid et al. 2018b <sup>21</sup>                                   | Polyunsaturated fat intake                                     | Major cardiovascular events         | Zhu et al. 2019 <sup>22</sup>          | Polyunsaturated fat intake           | Cardiovascular disease              | 2                     | 1                       | 1          | 1       | 2       |
| Adler et al. 2014 <sup>23</sup>                                         | Low-sodium intake                                              | All-cause mortality                 | Aburto et al. 2013 <sup>24</sup>       | Low-sodium intake                    | All-cause mortality                 | 2                     | 2                       | 2          | 1       | 2       |
| Adler et al. 2014 <sup>23</sup>                                         | Low-sodium intake                                              | Cardiovascular mortality            | Aburto et al. 2013 <sup>24</sup>       | Low-sodium intake                    | Cardiovascular mortality            | 2                     | 2                       | 2          | 1       | 2       |
| Adler et al. 2014 <sup>23</sup>                                         | Low-sodium intake                                              | Cardiovascular disease              | Aburto et al. 2013 <sup>24</sup>       | Low-sodium intake                    | Cardiovascular disease              | 2                     | 2                       | 2          | 1       | 2       |
| Adler et al. 2014 <sup>23</sup>                                         | Low-sodium intake                                              | Systolic blood pressure             | Leyvraz et al. 2018 <sup>25</sup>      | Low-sodium intake + status           | Systolic blood pressure             | 3                     | 2                       | 2          | 1       | 3       |
| Adler et al. 2014 <sup>23</sup>                                         | Low-sodium intake                                              | Diastolic blood pressure            | Leyvraz et al. 2018 <sup>25</sup>      | Low-sodium intake + status           | Diastolic blood pressure            | 3                     | 2                       | 2          | 1       | 3       |
| Al-Khudairy et al. 2017 <sup>1</sup>                                    | Vitamin C supplements                                          | Major cardiovascular events         | Aune et al. 2018 <sup>26</sup>         | Vitamin C intake                     | Cardiovascular disease              | 2                     | 2                       | 2          | 1       | 2       |
| Al-Khudairy et al. 2017 <sup>1</sup>                                    | Vitamin C supplements                                          | Cardiovascular mortality            | Aune et al. 2018 <sup>26</sup>         | Vitamin C intake                     | Cardiovascular mortality            | 2                     | 2                       | 2          | 1       | 2       |

## Supplementary data

|                                        |                               |                                     |                                          |                              |                          |   |   |   |   |   |
|----------------------------------------|-------------------------------|-------------------------------------|------------------------------------------|------------------------------|--------------------------|---|---|---|---|---|
| Al-Khudairy et al. 2017 <sup>1</sup>   | Vitamin C supplements         | All-cause mortality                 | Aune et al. 2018 <sup>26</sup>           | Vitamin C intake             | All-cause mortality      | 2 | 2 | 2 | 1 | 2 |
| Avenell et al. 2014 <sup>27</sup>      | Vitamin D supplements         | Hip fracture                        | Feng et al. 2017 <sup>28</sup>           | Vitamin D status             | Hip fracture             | 2 | 3 | 3 | 1 | 3 |
| Avenell et al. 2014 <sup>27</sup>      | Vitamin D supplements         | Any fracture                        | Feng et al. 2017 <sup>28</sup>           | Vitamin D status             | Any fracture             | 2 | 3 | 3 | 1 | 3 |
| Bjelakovic et al. 2012 <sup>117</sup>  | $\beta$ -carotene supplements | All-cause mortality                 | Aune et al. 2018 <sup>26</sup>           | $\beta$ -carotene intake     | All-cause mortality      | 2 | 2 | 2 | 1 | 2 |
| Bjelakovic et al. 2012 <sup>117</sup>  | Vitamin E supplements         | All-cause mortality                 | Aune et al. 2018 <sup>26</sup>           | Vitamin E intake             | All-cause mortality      | 2 | 2 | 2 | 1 | 2 |
| Bjelakovic et al. 2012 <sup>117</sup>  | Vitamin C supplements         | All-cause mortality                 | Aune et al. 2018 <sup>26</sup>           | Vitamin C intake             | All-cause mortality      | 2 | 2 | 2 | 1 | 2 |
| Bjelakovic et al. 2012 <sup>117</sup>  | Vitamin A supplements         | All-cause mortality                 | Aune et al. 2018 <sup>26</sup>           | $\beta$ -carotene intake     | All-cause mortality      | 2 | 3 | 3 | 1 | 3 |
| Bjelakovic et al. 2014a <sup>118</sup> | Vitamin D supplements         | All-cause mortality                 | Chowdhury et al. 2014b <sup>119</sup>    | Vitamin D status             | All-cause mortality      | 2 | 3 | 3 | 1 | 3 |
| Bjelakovic et al. 2014a <sup>118</sup> | Vitamin D supplements         | Cardiovascular mortality            | Chowdhury et al. 2014b <sup>119</sup>    | Vitamin D status             | Cardiovascular mortality | 2 | 3 | 3 | 1 | 3 |
| Bjelakovic et al. 2014a <sup>118</sup> | Vitamin D supplements         | Cancer mortality                    | Han et al. 2019 <sup>120</sup>           | Vitamin D status             | Cancer mortality         | 2 | 3 | 3 | 1 | 3 |
| Bjelakovic et al. 2014b <sup>29</sup>  | Vitamin D supplements         | Cancer occurrence                   | Han et al. 2019 <sup>120</sup>           | Vitamin D status             | Cancer incidence         | 2 | 3 | 3 | 1 | 3 |
| Bjelakovic et al. 2014b <sup>29</sup>  | Vitamin D3 supplements        | Breast cancer                       | Hossain et al. 2019 <sup>30</sup>        | Vitamin D supplements        | Breast cancer            | 2 | 1 | 1 | 1 | 2 |
| Bjelakovic et al. 2014b <sup>29</sup>  | Vitamin D3 supplements        | Lung cancer                         | Zhang et al. 2015 <sup>31</sup>          | Vitamin D intake             | Lung cancer              | 2 | 2 | 2 | 1 | 2 |
| Cormick et al. 2015 <sup>121</sup>     | Calcium supplements           | Systolic blood pressure             | Jayedi et al. 2019 <sup>122</sup>        | Calcium intake + supplements | Hypertension             | 2 | 2 | 2 | 3 | 3 |
| Cormick et al. 2015 <sup>121</sup>     | Calcium supplements           | Diastolic blood pressure            | Jayedi et al. 2019 <sup>122</sup>        | Calcium intake + supplements | Hypertension             | 2 | 2 | 2 | 3 | 3 |
| De-Regil et al. 2015 <sup>123</sup>    | Folate supplements            | Neural tube defect                  | Blencowe et al. 2010 <sup>124</sup>      | Folate supplements           | Neural tube defect       | 2 | 1 | 1 | 1 | 2 |
| De-Regil et al. 2015 <sup>123</sup>    | Folate supplements            | Congenital cardiovascular anomalies | Feng et al. 2015 <sup>125</sup>          | Folate supplements           | Congenital heart defect  | 1 | 1 | 1 | 2 | 2 |
| El Dib et al. 2015 <sup>126</sup>      | Zinc supplements              | HOMA-IR                             | Fernandez-Cao et al. 2019 <sup>127</sup> | Zinc supplements             | Type 2 diabetes          | 2 | 1 | 1 | 3 | 3 |
| Hartley et al. 2013 <sup>128</sup>     | Fruit & Vegetables intake     | Systolic blood pressure             | Schwingshackl et al. 2017 <sup>129</sup> | Fruit intake                 | Hypertension             | 2 | 2 | 2 | 3 | 3 |
| Hartley et al. 2013 <sup>128</sup>     | Fruit & Vegetables intake     | Diastolic blood pressure            | Schwingshackl et al. 2017 <sup>129</sup> | Vegetables intake            | Hypertension             | 2 | 2 | 2 | 3 | 3 |
| Hartley et al. 2016 <sup>130</sup>     | Fibre intake + supplements    | Systolic blood pressure             | Schwingshackl et al. 2017 <sup>129</sup> | Whole grain intake           | Hypertension             | 2 | 2 | 2 | 3 | 3 |
| Hartley et al. 2016 <sup>130</sup>     | Fibre intake + supplements    | Diastolic blood pressure            | Schwingshackl et al. 2017 <sup>129</sup> | Whole grain intake           | Hypertension             | 2 | 2 | 2 | 3 | 3 |
| Hemmingsen et al. 2017 <sup>131</sup>  | Healthy diet (intake)         | Type 2 diabetes                     | Schwingshackl et al. 2018 <sup>132</sup> | Diet quality (intake)        | Type 2 diabetes          | 2 | 1 | 1 | 1 | 2 |

## Supplementary data

|                                       |                                                    |                                |                                          |                          |                          |   |   |   |   |   |
|---------------------------------------|----------------------------------------------------|--------------------------------|------------------------------------------|--------------------------|--------------------------|---|---|---|---|---|
| Hemmingsen et al. 2017 <sup>131</sup> | Healthy diet (intake)                              | All-cause mortality            | Schwingshackl et al. 2018 <sup>132</sup> | Diet quality (intake)    | All-cause mortality      | 2 | 1 | 1 | 1 | 2 |
| Hofmeyr et al. 2018 <sup>32</sup>     | Calcium supplements                                | Pre-eclampsia                  | Newberry et al. 2014 <sup>33</sup>       | Calcium intake           | Pre-eclampsia            | 2 | 2 | 2 | 1 | 2 |
| Hofmeyr et al. 2018 <sup>32</sup>     | Calcium supplements                                | High blood pressure            | Newberry et al. 2014 <sup>33</sup>       | Calcium intake           | High blood pressure      | 2 | 2 | 2 | 1 | 2 |
| Hooper et al. 2012 <sup>34</sup>      | Low-fat / modified fat (intake + supplements)      | Cardiovascular mortality       | Noto et al. 2013 <sup>133</sup>          | High-carbohydrate intake | Cardiovascular mortality | 2 | 2 | 2 | 1 | 2 |
| Hooper et al. 2012 <sup>34</sup>      | Low-fat / modified fat (intake + supplements)      | All-cause mortality            | Seidlmann et al. 2018 <sup>134</sup>     | High-carbohydrate intake | All-cause mortality      | 2 | 2 | 2 | 1 | 2 |
| Hooper et al. 2012 <sup>34</sup>      | Low-fat / modified fat (intake + supplements)      | Combined cardiovascular events | Zhu et al. 2019 <sup>22</sup>            | Low-fat intake           | Cardiovascular disease   | 2 | 2 | 2 | 1 | 2 |
| Hooper et al. 2012 <sup>34</sup>      | Low-fat intake                                     | Body weight                    | Sartorius et al. 2018 <sup>135</sup>     | High-carbohydrate intake | Obesity                  | 2 | 2 | 2 | 3 | 3 |
| Hooper et al. 2015a <sup>136</sup>    | Low-fat intake                                     | Body weight                    | Sartorius et al. 2018 <sup>135</sup>     | High-carbohydrate intake | Obesity                  | 2 | 2 | 2 | 3 | 3 |
| Hooper et al. 2015b <sup>35</sup>     | Low saturated fat intake                           | All-cause mortality            | de Souza et al. 2015 <sup>36</sup>       | Low saturated fat intake | All-cause mortality      | 2 | 1 | 1 | 1 | 2 |
| Hooper et al. 2015b <sup>35</sup>     | Low saturated fat intake                           | Cardiovascular mortality       | de Souza et al. 2015 <sup>36</sup>       | Low saturated fat intake | Cardiovascular mortality | 2 | 1 | 1 | 1 | 2 |
| Hooper et al. 2015b <sup>35</sup>     | Low saturated fat intake                           | Combined cardiovascular events | de Souza et al. 2015 <sup>36</sup>       | Low saturated fat intake | Coronary heart disease   | 2 | 1 | 1 | 1 | 2 |
| Hooper et al. 2018 <sup>37</sup>      | Omega-6 intake + supplements                       | Combined cardiovascular events | Chowdhury et al. 2014a <sup>18</sup>     | Omega-6 intake           | Coronary heart disease   | 2 | 2 | 2 | 2 | 2 |
| Hooper et al. 2018 <sup>37</sup>      | Omega-6 intake + supplements                       | All-cause mortality            | Li et al. 2020 <sup>116</sup>            | Linoleic acid intake     | All-cause mortality      | 2 | 2 | 2 | 1 | 2 |
| Hooper et al. 2018 <sup>37</sup>      | Omega-6 intake + supplements                       | Cardiovascular mortality       | Li et al. 2020 <sup>116</sup>            | Linoleic acid intake     | Cardiovascular mortality | 2 | 2 | 2 | 1 | 2 |
| Jin et al. 2012 <sup>137</sup>        | Total flavonoids intake (+co-dietary intervention) | Colorectal adenoma             | Jin et al. 2012 <sup>137</sup>           | Total flavonoids intake  | Colorectal cancer        | 3 | 2 | 2 | 3 | 3 |
| Jin et al. 2012 <sup>137</sup>        | Isoflavonoes intake (+co-dietary intervention)     | Colorectal adenoma             | Jin et al. 2012 <sup>137</sup>           | Isoflavonoes intake      | Colorectal cancer        | 3 | 2 | 2 | 3 | 3 |
| Jin et al. 2012 <sup>137</sup>        | Flavonols intake (+co-dietary intervention)        | Colorectal adenoma             | Jin et al. 2012 <sup>137</sup>           | Flavonols intake         | Colorectal cancer        | 3 | 2 | 2 | 3 | 3 |
| Keats et al. 2019 <sup>38</sup>       | Micronutrients supplements (folic acid + iron)     | Preterm birth                  | Wolf et al. 2017 <sup>39</sup>           | Multivitamin supplements | Preterm birth            | 1 | 2 | 2 | 1 | 2 |
| Keats et al. 2019 <sup>38</sup>       | Micronutrients supplements (folic acid + iron)     | Low birth weight               | Wolf et al. 2017 <sup>39</sup>           | Multivitamin supplements | Low birth weight         | 1 | 2 | 2 | 1 | 2 |

## Supplementary data

|                                   |                                                |                                |                                          |                             |                             |   |   |   |   |   |
|-----------------------------------|------------------------------------------------|--------------------------------|------------------------------------------|-----------------------------|-----------------------------|---|---|---|---|---|
| Keats et al. 2019 <sup>38</sup>   | Micronutrients supplements (folic acid + iron) | Small gestational age          | Wolf et al. 2017 <sup>39</sup>           | Multivitamin supplements    | Small gestational age       | 1 | 2 | 2 | 1 | 2 |
| Kelly et al. 2017 <sup>138</sup>  | Whole grains intake                            | Systolic blood pressure        | Schwingshackl et al. 2017 <sup>129</sup> | Whole grain intake          | Hypertension                | 2 | 1 | 1 | 3 | 3 |
| Kelly et al. 2017 <sup>138</sup>  | Whole grains intake                            | Diastolic blood pressure       | Schwingshackl et al. 2017 <sup>129</sup> | Whole grain intake          | Hypertension                | 2 | 1 | 1 | 3 | 3 |
| Kelly et al. 2017 <sup>138</sup>  | Whole grains intake                            | Body weight                    | Ye et al. 2012 <sup>139</sup>            | Whole grain intake          | Body weight                 | 2 | 1 | 1 | 1 | 2 |
| Mathew et al. 2012 <sup>140</sup> | $\beta$ -carotene supplements                  | Cataract                       | Jiang et al. 2019 <sup>141</sup>         | $\beta$ -carotene intake    | Cataract                    | 2 | 2 | 2 | 1 | 2 |
| Mathew et al. 2012 <sup>140</sup> | Vitamin E supplements                          | Cataract                       | Jiang et al. 2019 <sup>141</sup>         | Vitamin E intake            | Cataract                    | 2 | 2 | 2 | 1 | 2 |
| Mathew et al. 2012 <sup>140</sup> | Vitamin C supplements                          | Cataract                       | Jiang et al. 2019 <sup>141</sup>         | Vitamin C intake            | Cataract                    | 2 | 2 | 2 | 1 | 2 |
| Palacios et al. 2019 <sup>6</sup> | Vitamin D supplements                          | Gestational diabetes           | Hu et al. 2018 <sup>5</sup>              | Vitamin D status            | Gestational diabetes        | 1 | 3 | 3 | 1 | 3 |
| Palacios et al. 2019 <sup>6</sup> | Vitamin D supplements                          | Preterm birth                  | Tous et al. 2020 <sup>7</sup>            | Vitamin D status            | Preterm birth               | 1 | 3 | 3 | 1 | 3 |
| Palacios et al. 2019 <sup>6</sup> | Vitamin D supplements                          | Birth length                   | Tous et al. 2020 <sup>7</sup>            | Vitamin D status            | Birth length                | 2 | 3 | 3 | 1 | 3 |
| Palacios et al. 2019 <sup>6</sup> | Vitamin D supplements                          | Birth weight                   | Tous et al. 2020 <sup>7</sup>            | Vitamin D status            | Birth weight                | 2 | 3 | 3 | 1 | 3 |
| Palacios et al. 2019 <sup>6</sup> | Vitamin D supplements                          | Head circumference at birth    | Tous et al. 2020 <sup>7</sup>            | Vitamin D status            | Head circumference at birth | 2 | 3 | 3 | 1 | 3 |
| Palacios et al. 2019 <sup>6</sup> | Vitamin D supplements                          | Pre-eclampsia                  | Yuan et al. 2019 <sup>8</sup>            | Vitamin D status            | Pre-eclampsia               | 1 | 3 | 3 | 1 | 3 |
| Rees et al. 2013a <sup>40</sup>   | Healthy diet (intake)                          | Systolic blood pressure        | Kastorini et al. 2011 <sup>41</sup>      | Mediterranean diet (intake) | Systolic blood pressure     | 2 | 1 | 1 | 1 | 2 |
| Rees et al. 2013a <sup>40</sup>   | Healthy diet (intake)                          | Diastolic blood pressure       | Kastorini et al. 2011 <sup>41</sup>      | Mediterranean diet (intake) | Diastolic blood pressure    | 2 | 1 | 1 | 1 | 2 |
| Rees et al. 2013b <sup>42</sup>   | Selenium supplements                           | All-cause mortality            | Jayedi et al. 2018 <sup>142</sup>        | Selenium intake             | All-cause mortality         | 2 | 2 | 2 | 1 | 2 |
| Rees et al. 2013b <sup>42</sup>   | Selenium supplements                           | Cardiovascular mortality       | Xiang et al. 2019 <sup>143</sup>         | Selenium status             | Cardiovascular mortality    | 2 | 3 | 3 | 1 | 3 |
| Rees et al. 2013b <sup>42</sup>   | Selenium supplements                           | Combined cardiovascular events | Zhang et al. 2016a <sup>43</sup>         | Selenium status             | Cardiovascular disease      | 2 | 3 | 3 | 1 | 3 |
| Rees et al. 2019 <sup>3</sup>     | Mediterranean diet (intake)                    | High Density Lipoprotein       | Kastorini et al. 2011 <sup>41</sup>      | Mediterranean diet (intake) | High Density Lipoprotein    | 2 | 1 | 1 | 1 | 2 |
| Rees et al. 2019 <sup>3</sup>     | Mediterranean diet (intake)                    | Triglycerides                  | Kastorini et al. 2011 <sup>41</sup>      | Mediterranean diet (intake) | Triglycerides               | 2 | 1 | 1 | 1 | 2 |
| Rees et al. 2019 <sup>3</sup>     | Mediterranean diet (intake)                    | Systolic blood pressure        | Kastorini et al. 2011 <sup>41</sup>      | Mediterranean diet (intake) | Systolic blood pressure     | 2 | 1 | 1 | 1 | 2 |
| Rees et al. 2019 <sup>3</sup>     | Mediterranean diet (intake)                    | Cardiovascular mortality       | Rosato et al. 2019 <sup>44</sup>         | Mediterranean diet (intake) | Cardiovascular mortality    | 2 | 1 | 1 | 1 | 2 |
| Rees et al. 2019 <sup>3</sup>     | Mediterranean diet (intake)                    | Combined cardiovascular events | Rosato et al. 2019 <sup>44</sup>         | Mediterranean diet (intake) | Cardiovascular disease      | 2 | 1 | 1 | 1 | 2 |

## Supplementary data

|                                     |                                     |                               |                                           |                             |                       |   |   |   |   |   |
|-------------------------------------|-------------------------------------|-------------------------------|-------------------------------------------|-----------------------------|-----------------------|---|---|---|---|---|
| Rees et al. 2019 <sup>3</sup>       | Mediterranean diet (intake)         | All-cause mortality           | Soltani et al. 2019 <sup>144</sup>        | Mediterranean diet (intake) | All-cause mortality   | 2 | 1 | 1 | 1 | 2 |
| Rutjes et al. 2018 <sup>10</sup>    | B-Vitamin supplements               | Dementia /MCI                 | Doets et al. 2013 <sup>145</sup>          | Vitamin B12 intake          | Dementia              | 3 | 2 | 2 | 2 | 3 |
| Rutjes et al. 2018 <sup>10</sup>    | Vitamin D3 supplements              | Dementia                      | Goodwill et al. 2017 <sup>9</sup>         | Vitamin D status            | Dementia / MCI        | 1 | 3 | 3 | 3 | 3 |
| Sydenham et al. 2012 <sup>146</sup> | Omega-3 supplements                 | Mini-Mental State Examination | Zhang et al. 2016b <sup>147</sup>         | Omega-3 intake              | Dementia              | 1 | 2 | 2 | 3 | 3 |
| Tieu et al. 2017 <sup>12</sup>      | Healthy diet                        | Preterm birth                 | Chia et al. 2019 <sup>11</sup>            | Healthy diet (intake)       | Preterm birth         | 2 | 1 | 1 | 1 | 2 |
| Tieu et al. 2017 <sup>12</sup>      | Healthy diet                        | Small gestational age         | Chia et al. 2019 <sup>11</sup>            | Healthy diet (intake)       | Small gestational age | 2 | 1 | 1 | 1 | 2 |
| Tieu et al. 2017 <sup>12</sup>      | Healthy diet                        | Birth weight                  | Chia et al. 2019 <sup>11</sup>            | Healthy diet (intake)       | Birth weight          | 2 | 1 | 1 | 1 | 2 |
| Tieu et al. 2017 <sup>12</sup>      | Healthy diet                        | Gestational diabetes          | Mijatovic-Vukas et al. 2018 <sup>13</sup> | Mediterranean diet (intake) | Gestational diabetes  | 2 | 1 | 1 | 1 | 2 |
| Usinger et al. 2012 <sup>148</sup>  | Fermented milk intake + supplements | Systolic blood pressure       | Soedamah-Muthu et al. 2012 <sup>149</sup> | Fermented milk intake       | Hypertension          | 2 | 2 | 2 | 3 | 3 |
| Usinger et al. 2012 <sup>148</sup>  | Fermented milk intake + supplements | Diastolic blood pressure      | Soedamah-Muthu et al. 2012 <sup>149</sup> | Fermented milk intake       | Hypertension          | 2 | 2 | 2 | 3 | 3 |
| Vinceti et al. 2018 <sup>14</sup>   | Selenium supplements                | Cancer                        | Vinceti et al. 2018 <sup>14</sup>         | Selenium status             | Cancer                | 2 | 3 | 3 | 1 | 3 |
| Vinceti et al. 2018 <sup>14</sup>   | Selenium supplements                | Cancer mortality              | Vinceti et al. 2018 <sup>14</sup>         | Selenium intake             | Cancer mortality      | 2 | 2 | 2 | 1 | 2 |
| Vinceti et al. 2018 <sup>14</sup>   | Selenium supplements                | Colorectal cancer             | Vinceti et al. 2018 <sup>14</sup>         | Selenium supplements        | Colorectal cancer     | 2 | 1 | 1 | 1 | 2 |
| Yao et al. 2017 <sup>45</sup>       | Fibre intake                        | Colorectal cancer             | Aune et al. 2011 <sup>150</sup>           | Fibre intake                | Colorectal cancer     | 2 | 1 | 1 | 1 | 2 |
| Yao et al. 2017 <sup>45</sup>       | Fibre intake                        | Colorectal adenoma            | Ben et al. 2014 <sup>46</sup>             | Fibre intake                | Colorectal adenoma    | 3 | 1 | 1 | 1 | 3 |

HOMA-IR: homeostasis model assessment-insulin resistance; MCI: mild cognitive impairment; PI/ECO: population – intervention/exposure – comparator – outcome; RCT: randomized controlled trial.



Supplementary data

Supplementary Table 14: Heterogeneity including  $I^2$  (%) and tau ( $\tau^2$ ) of bodies of evidence from randomized controlled trials and cohort studies in the meta-analysis.

| Bodies of evidence from randomized controlled trials (Cochrane Reviews) |                                          |                                     |            |                                               |                      | Bodies of evidence from cohort studies |                                      |                                     |            |                                               |                      |
|-------------------------------------------------------------------------|------------------------------------------|-------------------------------------|------------|-----------------------------------------------|----------------------|----------------------------------------|--------------------------------------|-------------------------------------|------------|-----------------------------------------------|----------------------|
| Reference                                                               | Intervention and type of intake          | Outcome (as defined by the authors) | Studies, n | Summary measure, and effect estimate (95% CI) | $I^2$ (%) / $\tau^2$ | Reference                              | Exposure and type of intake/exposure | Outcome (as defined by the authors) | Studies, n | Summary measure, and effect estimate (95% CI) | $I^2$ (%) / $\tau^2$ |
| Abdelhamid et al. 2018a <sup>15</sup>                                   | Omega-3 intake + supplements             | Cardiovascular mortality            | 25         | RR: 0.95 (0.87, 1.03)                         | 24/ 0.01             | Chowdhury et al. 2014a <sup>18</sup>   | Omega-3 intake                       | Coronary heart disease mortality    | NA         | RR: 0.90 (0.70, 1.14)                         | NR                   |
| Abdelhamid et al. 2018a <sup>15</sup>                                   | Omega-3 intake + supplements             | Cardiovascular disease              | 38         | RR: 0.99 (0.94, 1.04)                         | 37/ 0.00             | Chowdhury et al. 2014a <sup>18</sup>   | Omega-3 intake                       | Coronary heart disease              | 16         | RR: 0.87 (0.78, 0.97)                         | 76/ 0.03             |
| Abdelhamid et al. 2018a <sup>15</sup>                                   | $\alpha$ -Linolenic acid intake          | Cardiovascular disease              | 5          | RR: 0.95 (0.83, 1.07)                         | 0/ 0.00              | Pan et al. et al. 2012 <sup>19</sup>   | $\alpha$ -Linolenic acid intake      | Cardiovascular disease              | 11         | RR: 0.93 (0.85, 1.03)                         | 41/ 0.01             |
| Abdelhamid et al. 2018a <sup>15</sup>                                   | Omega-3 intake + supplements             | Body weight                         | 12         | MD: -0.01 (-0.84, 0.82)                       | 49                   | Schlesinger et al. 2019 <sup>16</sup>  | Fish intake                          | Weight gain                         | 1          | RR: 1.06 (0.83, 1.35)                         | NA                   |
| Abdelhamid et al. 2018a <sup>15</sup>                                   | Omega-3 intake + supplements             | All-cause mortality                 | 39         | RR: 0.98 (0.93, 1.03)                         | 11/ 0.00             | Wan et al. 2017 <sup>115</sup>         | Omega-3 intake                       | All-cause mortality                 | 6          | RR: 0.86 (0.80, 0.93)                         | 56/ 0.00             |
| Abdelhamid et al. 2018a <sup>15</sup>                                   | $\alpha$ -Linolenic acid intake          | Cardiovascular mortality            | 4          | RR: 0.96 (0.74, 1.25)                         | 0/ 0.00              | Wei et al. 2018 <sup>20</sup>          | $\alpha$ -Linolenic acid intake      | Coronary heart disease mortality    | 9          | RR: 0.85 (0.75, 0.96)                         | 16/ 0.01             |
| Abdelhamid et al. 2018a <sup>15</sup>                                   | $\alpha$ -Linolenic acid intake          | Coronary heart disease              | 4          | RR: 1.00 (0.82, 1.22)                         | 2/ 0.00              | Wei et al. 2018 <sup>20</sup>          | $\alpha$ -Linolenic acid intake      | Coronary heart disease              | 13         | RR: 0.91 (0.85, 0.97)                         | 6/ 0.00              |
| Abdelhamid et al. 2018b <sup>21</sup>                                   | Polyunsaturated fat intake + supplements | All-cause mortality                 | 24         | RR: 0.98 (0.89, 1.07)                         | 0/ 0.00              | Li et al. 2020 <sup>116</sup>          | Linoleic acid intake                 | All-cause mortality                 | 11         | RR: 0.87 (0.81, 0.94)                         | 68/ 0.01             |
| Abdelhamid et al. 2018b <sup>21</sup>                                   | Polyunsaturated fat intake + supplements | Coronary heart disease              | 15         | RR: 0.87 (0.72, 1.06)                         | 45/ 0.04             | Chowdhury et al. 2014a <sup>18</sup>   | Omega-6 intake                       | Coronary heart disease              | 8          | RR: 0.98 (0.90, 1.06)                         | 54/ 0.01             |
| Abdelhamid et al. 2018b <sup>21</sup>                                   | Polyunsaturated fat intake               | Major cardiovascular events         | 2          | RR: 0.84 (0.59, 1.20)                         | 79/ 0.05             | Zhu et al. 2019 <sup>22</sup>          | Polyunsaturated fat intake           | Cardiovascular disease              | 30         | RR: 0.97 (0.93, 1.00)                         | 54/ 0.00             |
| Adler et al. 2014 <sup>23</sup>                                         | Low-sodium intake                        | All-cause mortality                 | 7          | RR: 0.96 (0.83, 1.10)                         | 0/ 0.00              | Aburto et al. 2013 <sup>24</sup>       | Low-sodium intake                    | All-cause mortality                 | 2          | RR: 0.95 (0.71, 1.27)                         | 82/ 0.05             |
| Adler et al. 2014 <sup>23</sup>                                         | Low-sodium intake                        | Cardiovascular mortality            | 3          | RR: 0.67 (0.45, 1.01)                         | 0/ 0.00              | Aburto et al. 2013 <sup>24</sup>       | Low-sodium intake                    | Cardiovascular mortality            | 3          | RR: 0.87 (0.64, 1.18)                         | 79/ 0.07             |
| Adler et al. 2014 <sup>23</sup>                                         | Low-sodium intake                        | Cardiovascular disease              | 4          | RR: 0.76 (0.57, 1.01)                         | 0/ 0.00              | Aburto et al. 2013 <sup>24</sup>       | Low-sodium intake                    | Cardiovascular disease              | 3          | RR: 0.87 (0.64, 1.18)                         | 79/ 0.07             |
| Adler et al. 2014 <sup>23</sup>                                         | Low-sodium intake                        | Systolic blood pressure             | 6          | MD: -1.79 (-3.23, -0.36)                      | 74                   | Leyvraz et al. 2018 <sup>25</sup>      | Low-sodium intake + status           | Systolic blood pressure             | 1          | MD: -1.20 (-1.50, -0.90)                      | NA                   |
| Adler et al. 2014 <sup>23</sup>                                         | Low-sodium intake                        | Diastolic blood pressure            | 5          | MD: -1.17 (-2.08, -0.26)                      | 58                   | Leyvraz et al. 2018 <sup>25</sup>      | Low-sodium intake + status           | Diastolic blood pressure            | 1          | MD: 1.20 (1.00, 1.50)                         | NA                   |
| Al-Khudairy et al. 2017 <sup>1</sup>                                    | Vitamin C supplements                    | Major cardiovascular events         | 1          | HR: 0.99 (0.89, 1.10)                         | NA                   | Aune et al. 2018 <sup>26</sup>         | Vitamin C intake                     | Cardiovascular disease              | 9          | RR: 0.84 (0.77, 0.91)                         | 0/ 0.00              |
| Al-Khudairy et al. 2017 <sup>1</sup>                                    | Vitamin C supplements                    | Cardiovascular mortality            | 1          | HR: 1.02 (0.85, 1.22)                         | NA                   | Aune et al. 2018 <sup>26</sup>         | Vitamin C intake                     | Cardiovascular mortality            | 9          | RR: 0.88 (0.83, 0.94)                         | 29/ NR               |

## Supplementary data

|                                        |                                               |                                     |    |                       |          |                                          |                          |                          |    |                       |          |
|----------------------------------------|-----------------------------------------------|-------------------------------------|----|-----------------------|----------|------------------------------------------|--------------------------|--------------------------|----|-----------------------|----------|
| Al-Khudairy et al. 2017 <sup>1</sup>   | Vitamin C supplements                         | All-cause mortality                 | 1  | HR: 1.07 (0.97, 1.18) | NA       | Aune et al. 2018 <sup>26</sup>           | Vitamin C intake         | All-cause mortality      | 16 | RR: 0.86 (0.80, 0.92) | 69/ 0.01 |
| Avenell et al. 2014 <sup>27</sup>      | Vitamin D supplements                         | Hip fracture                        | 10 | RR: 1.12 (0.97, 1.30) | 0/ 0.00  | Feng et al. 2017 <sup>28</sup>           | Vitamin D status         | Hip fracture             | 11 | RR: 0.68 (0.60, 0.78) | 17/ 0.01 |
| Avenell et al. 2014 <sup>27</sup>      | Vitamin D supplements                         | Any fracture                        | 14 | RR: 1.04 (0.96, 1.12) | 18/ 0.01 | Feng et al. 2017 <sup>28</sup>           | Vitamin D status         | Any fracture             | 11 | RR: 0.80 (0.68, 0.94) | 72/ 0.06 |
| Bjelakovic et al. 2012 <sup>117</sup>  | β-carotene supplements                        | All-cause mortality                 | 31 | RR: 1.02 (0.98, 1.07) | 34/ 0.00 | Aune et al. 2018 <sup>26</sup>           | β-carotene intake        | All-cause mortality      | 8  | RR: 0.82 (0.78, 0.87) | 0/ 0.00  |
| Bjelakovic et al. 2012 <sup>117</sup>  | Vitamin E supplements                         | All-cause mortality                 | 64 | RR: 1.02 (0.99, 1.04) | 0/ 0.00  | Aune et al. 2018 <sup>26</sup>           | Vitamin E intake         | All-cause mortality      | 9  | RR: 0.98 (0.93, 1.04) | 6/ 0.00  |
| Bjelakovic et al. 2012 <sup>117</sup>  | Vitamin C supplements                         | All-cause mortality                 | 41 | RR: 1.01 (0.97, 1.05) | 0/ 0.00  | Aune et al. 2018 <sup>26</sup>           | Vitamin C intake         | All-cause mortality      | 16 | RR: 0.86 (0.80, 0.92) | 69/ 0.01 |
| Bjelakovic et al. 2012 <sup>117</sup>  | Vitamin A supplements                         | All-cause mortality                 | 18 | RR: 1.04 (0.96, 1.13) | 25/ 0.00 | Aune et al. 2018 <sup>26</sup>           | β-carotene intake        | All-cause mortality      | 8  | RR: 0.82 (0.78, 0.87) | 0/ 0.00  |
| Bjelakovic et al. 2014a <sup>118</sup> | Vitamin D supplements                         | All-cause mortality                 | 56 | RR: 0.97 (0.94, 0.99) | 0/ 0.00  | Chowdhury et al. 2014b <sup>119</sup>    | Vitamin D status         | All-cause mortality      | 68 | RR: 0.69 (0.65, 0.75) | 83/ 0.05 |
| Bjelakovic et al. 2014a <sup>118</sup> | Vitamin D supplements                         | Cardiovascular mortality            | 10 | RR: 0.98 (0.90, 1.07) | 0/ 0.00  | Chowdhury et al. 2014b <sup>119</sup>    | Vitamin D status         | Cardiovascular mortality | 29 | RR: 0.70 (0.61, 0.80) | 84/ 0.10 |
| Bjelakovic et al. 2014a <sup>118</sup> | Vitamin D supplements                         | Cancer mortality                    | 4  | RR: 0.88 (0.78, 0.98) | 0/ 0.00  | Han et al. 2019 <sup>120</sup>           | Vitamin D status         | Cancer mortality         | 16 | RR: 0.81 (0.71, 0.93) | 49/ 0.04 |
| Bjelakovic et al. 2014b <sup>29</sup>  | Vitamin D supplements                         | Cancer occurrence                   | 18 | RR: 1.00 (0.94, 1.06) | 0/ 0.00  | Han et al. 2019 <sup>120</sup>           | Vitamin D status         | Cancer incidence         | 8  | RR: 0.86 (0.73, 1.02) | 71/ 0.03 |
| Bjelakovic et al. 2014b <sup>29</sup>  | Vitamin D3 supplements                        | Breast cancer                       | 7  | RR: 0.97 (0.86, 1.09) | 0/ 0.00  | Hossain et al. 2019 <sup>30</sup>        | Vitamin D supplements    | Breast cancer            | 2  | RR: 0.94 (0.87, 1.02) | 69/ 0.00 |
| Bjelakovic et al. 2014b <sup>29</sup>  | Vitamin D3 supplements                        | Lung cancer                         | 5  | RR: 0.86 (0.69, 1.07) | 0/ 0.00  | Zhang et al. 2015 <sup>31</sup>          | Vitamin D intake         | Lung cancer              | 3  | RR: 0.89 (0.74, 1.06) | 0/ 0.00  |
| De-Regil et al. 2015 <sup>123</sup>    | Folate supplements                            | Neural tube defect                  | 5  | RR: 0.31 (0.17, 0.58) | 0/ 0.00  | Blencowe et al. 2010 <sup>124</sup>      | Folate supplements       | Neural tube defect       | 3  | RR: 0.37 (0.23, 0.58) | 30/ 0.06 |
| De-Regil et al. 2015 <sup>123</sup>    | Folate supplements                            | Congenital cardiovascular anomalies | 3  | RR: 0.57 (0.24, 1.33) | 0/ 0.00  | Feng et al. 2015 <sup>125</sup>          | Folate supplements       | Congenital heart defect  | 1  | RR: 0.60 (0.38, 0.96) | NA       |
| Hemmingsen et al. 2017 <sup>131</sup>  | Healthy diet (intake)                         | Type 2 diabetes                     | 1  | RR: 0.65 (0.52, 0.81) | NA       | Schwingshackl et al. 2018 <sup>132</sup> | Diet quality (intake)    | Type 2 diabetes          | 10 | RR: 0.82 (0.78, 0.85) | 72/ 0.01 |
| Hemmingsen et al. 2017 <sup>131</sup>  | Healthy diet (intake)                         | All-cause mortality                 | 1  | RR: 1.02 (0.21, 4.98) | NA       | Schwingshackl et al. 2018 <sup>132</sup> | Diet quality (intake)    | All-cause mortality      | 13 | RR: 0.78 (0.77, 0.80) | 59/ 0.00 |
| Hofmeyr et al. 2018 <sup>32</sup>      | Calcium supplements                           | Pre-eclampsia                       | 13 | RR: 0.45 (0.31, 0.65) | 70/ 0.18 | Newberry et al. 2014 <sup>33</sup>       | Calcium intake           | Pre-eclampsia            | 2  | RR: 0.97 (0.78, 1.21) | 13/ 0.01 |
| Hofmeyr et al. 2018 <sup>32</sup>      | Calcium supplements                           | High blood pressure                 | 12 | RR: 0.65 (0.53, 0.81) | 74/ 0.06 | Newberry et al. 2014 <sup>33</sup>       | Calcium intake           | High blood pressure      | 2  | RR: 1.12 (0.83, 1.50) | 66/ 0.03 |
| Hooper et al. 2012 <sup>34</sup>       | Low-fat / modified fat (intake + supplements) | Cardiovascular mortality            | 14 | RR: 0.94 (0.85, 1.04) | 0/ 0.00  | Noto et al. 2013 <sup>133</sup>          | High-carbohydrate intake | Cardiovascular mortality | 3  | RR: 0.91 (0.81, 1.02) | 0/ 0.00  |
| Hooper et al. 2012 <sup>34</sup>       | Low-fat / modified fat (intake + supplements) | All-cause mortality                 | 20 | RR: 0.98 (0.93, 1.04) | 0/ 0.00  | Seidelmann et al. 2018 <sup>134</sup>    | High-carbohydrate intake | All-cause mortality      | 6  | RR: 0.83 (0.76, 0.92) | 40/ 0.00 |

## Supplementary data

|                                   |                                               |                                |    |                          |          |                                      |                          |                          |    |                           |          |
|-----------------------------------|-----------------------------------------------|--------------------------------|----|--------------------------|----------|--------------------------------------|--------------------------|--------------------------|----|---------------------------|----------|
| Hooper et al. 2012 <sup>34</sup>  | Low-fat / modified fat (intake + supplements) | Combined cardiovascular events | 18 | RR: 0.86 (0.77, 0.96)    | 50/ 0.02 | Zhu et al. 2019 <sup>22</sup>        | Low-fat intake           | Cardiovascular disease   | 32 | RR: 1.03 (0.99, 1.08)     | 55/ 0.01 |
| Hooper et al. 2015b <sup>35</sup> | Low saturated fat intake                      | All-cause mortality            | 11 | RR: 0.97 (0.90, 1.05)    | 3/ 0.00  | de Souza et al. 2015 <sup>36</sup>   | Low saturated fat intake | All-cause mortality      | 5  | RR: 1.01 (0.92, 1.10)     | 33/ 0.00 |
| Hooper et al. 2015b <sup>35</sup> | Low saturated fat intake                      | Cardiovascular mortality       | 10 | RR: 0.95 (0.80, 1.12)    | 30/ 0.02 | de Souza et al. 2015 <sup>36</sup>   | Low saturated fat intake | Cardiovascular mortality | 3  | RR: 1.03 (0.89, 1.19)     | 18/ 0.00 |
| Hooper et al. 2015b <sup>35</sup> | Low saturated fat intake                      | Combined cardiovascular events | 11 | RR: 0.83 (0.72, 0.96)    | 65/ 0.03 | de Souza et al. 2015 <sup>36</sup>   | Low saturated fat intake | Coronary heart disease   | 12 | RR: 0.94 (0.85, 1.05)     | 47/ 0.02 |
| Hooper et al. 2018 <sup>37</sup>  | Omega-6 intake + supplements                  | Combined cardiovascular events | 7  | RR: 0.97 (0.81, 1.15)    | 45/ 0.02 | Chowdhury et al. 2014a <sup>18</sup> | Omega-6 intake           | Coronary heart disease   | 8  | RR: 0.98 (0.90, 1.06)     | 54/ 0.01 |
| Hooper et al. 2018 <sup>37</sup>  | Omega-6 intake + supplements                  | All-cause mortality            | 10 | RR: 1.00 (0.88, 1.12)    | 0/ 0.00  | Li et al. 2020 <sup>116</sup>        | Linoleic acid intake     | All-cause mortality      | 11 | RR: 0.87 (0.81, 0.94)     | 68/ 0.01 |
| Hooper et al. 2018 <sup>37</sup>  | Omega-6 intake + supplements                  | Cardiovascular mortality       | 7  | RR: 1.09 (0.76, 1.55)    | 61/ 0.1  | Li et al. 2020 <sup>116</sup>        | Linoleic acid intake     | Cardiovascular mortality | 14 | RR: 0.87 (0.82, 0.92)     | 6/ 0.00  |
| Jin et al. 2012 <sup>137</sup>    | Total flavonoids intake                       | Colorectal adenoma             | 1  | RR: 1.09 (0.93, 1.28)    | NA       | Jin et al. 2012 <sup>137</sup>       | Total flavonoids intake  | Colorectal cancer        | 3  | RR: 1.00 (0.80, 1.25)     | 66/ 0.02 |
| Jin et al. 2012 <sup>137</sup>    | Isoflavonoes intake                           | Colorectal adenoma             | 1  | RR: 0.98 (0.83, 1.16)    | NA       | Jin et al. 2012 <sup>137</sup>       | Isoflavonoes intake      | Colorectal cancer        | 1  | RR: 1.16 (0.96, 1.41)     | NA       |
| Jin et al. 2012 <sup>137</sup>    | Flavonols intake                              | Colorectal adenoma             | 1  | RR: 0.94 (0.80, 1.10)    | NA       | Jin et al. 2012 <sup>137</sup>       | Flavonols intake         | Colorectal cancer        | 1  | RR: 0.95 (0.83, 1.08)     | NA       |
| Keats et al. 2019 <sup>38</sup>   | Micronutrients supplements                    | Preterm birth                  | 18 | RR: 0.95 (0.90, 1.01)    | 51/ 0.01 | Wolf et al. 2017 <sup>39</sup>       | Multivitamin supplements | Preterm birth            | 4  | RR: 0.84 (0.69, 1.03)     | 73/ 0.03 |
| Keats et al. 2019 <sup>38</sup>   | Micronutrients supplements                    | Low birth weight               | 18 | RR: 0.88 (0.85, 0.91)    | 0/ 0.00  | Wolf et al. 2017 <sup>39</sup>       | Multivitamin supplements | Low birth weight         | 2  | RR: 0.79 (0.45, 1.41)     | 89/ 0.15 |
| Keats et al. 2019 <sup>38</sup>   | Micronutrients supplements                    | Small gestational age          | 17 | RR: 0.92 (0.88, 0.97)    | 40/ 0.00 | Wolf et al. 2017 <sup>39</sup>       | Multivitamin supplements | Small gestational age    | 3  | RR: 0.77 (0.63, 0.93)     | 43/ 0.01 |
| Kelly et al. 2017 <sup>138</sup>  | Whole grain intake                            | Body weight                    | 5  | MD: -0.41 (-1.04, 0.23)  | 0        | Ye et al. 2012 <sup>139</sup>        | Whole grain intake       | Body weight              | 3  | MD: -0.30 (-0.37, -0.24)  | 99       |
| Mathew et al. 2012 <sup>140</sup> | β-carotene supplements                        | Cataract                       | 2  | RR: 0.99 (0.91, 1.08)    | 0/ 0.00  | Jiang et al. 2019 <sup>141</sup>     | β-carotene intake        | Cataract                 | 7  | RR: 0.90 (0.83, 0.99)     | 0/ 0.00  |
| Mathew et al. 2012 <sup>140</sup> | Vitamin E supplements                         | Cataract                       | 3  | RR: 0.97 (0.91, 1.04)    | 0/ 0.00  | Jiang et al. 2019 <sup>141</sup>     | Vitamin E intake         | Cataract                 | 6  | RR: 0.90 (0.80, 1.00)     | 31/ 0.01 |
| Mathew et al. 2012 <sup>140</sup> | Vitamin C supplements                         | Cataract                       | 1  | RR: 1.02 (0.91, 1.14)    | NA       | Jiang et al. 2019 <sup>141</sup>     | Vitamin C intake         | Cataract                 | 7  | RR: 0.80 (0.72, 0.88)     | 78/ 0.07 |
| Palacios et al. 2019 <sup>6</sup> | Vitamin D supplements                         | Gestational diabetes           | 5  | RR: 0.54 (0.34, 0.86)    | 0/ 0.00  | Hu et al. 2018 <sup>5</sup>          | Vitamin D status         | Gestational diabetes     | 21 | OR: 0.76 (0.64, 0.90)     | 61/ 0.08 |
| Palacios et al. 2019 <sup>6</sup> | Vitamin D supplements                         | Preterm birth                  | 4  | RR: 1.25 (0.92, 1.69)    | 0/ 0.00  | Tous et al. 2020 <sup>7</sup>        | Vitamin D status         | Preterm birth            | 19 | OR: 0.78 (0.65, 0.93)     | 63/ 0.08 |
| Palacios et al. 2019 <sup>6</sup> | Vitamin D supplements                         | Birth length                   | 11 | MD: -0.04 (-0.26, 0.19)  | 23       | Tous et al. 2020 <sup>7</sup>        | Vitamin D status         | Birth length             | 7  | MD: -0.12 (-0.33, 0.09)   | 62       |
| Palacios et al. 2019 <sup>6</sup> | Vitamin D supplements                         | Birth weight                   | 13 | MD: 32.61 (-9.51, 74.72) | 22       | Tous et al. 2020 <sup>7</sup>        | Vitamin D status         | Birth weight             | 14 | MD: 84.20 (52.59, 115.81) | 58       |

## Supplementary data

|                                   |                             |                                |    |                          |          |                                           |                             |                             |    |                            |          |
|-----------------------------------|-----------------------------|--------------------------------|----|--------------------------|----------|-------------------------------------------|-----------------------------|-----------------------------|----|----------------------------|----------|
| Palacios et al. 2019 <sup>6</sup> | Vitamin D supplements       | Head circumference at birth    | 10 | MD: 0.08 (-0.09, 0.25)   | 40       | Tous et al. 2020 <sup>7</sup>             | Vitamin D status            | Head circumference at birth | 7  | MD: 0.47 (-0.16, 1.11)     | 98       |
| Palacios et al. 2019 <sup>6</sup> | Vitamin D supplements       | Pre-eclampsia                  | 5  | RR: 0.96 (0.65, 1.42)    | 0/ 0.00  | Yuan et al. 2019 <sup>8</sup>             | Vitamin D status            | Pre-eclampsia               | 15 | OR: 0.62 (0.50, 0.78)      | 60/ 0.10 |
| Rees et al. 2013a <sup>40</sup>   | Healthy diet (intake)       | Systolic blood pressure        | 11 | MD: -2.61 (-3.91, -1.31) | 55       | Kastorini et al. 2011 <sup>41</sup>       | Mediterranean diet (intake) | Systolic blood pressure     | 1  | MD: 0.80 (-0.84, 2.44)     | NA       |
| Rees et al. 2013a <sup>40</sup>   | Healthy diet (intake)       | Diastolic blood pressure       | 11 | MD: -1.45 (-2.22, -0.68) | 45       | Kastorini et al. 2011 <sup>41</sup>       | Mediterranean diet (intake) | Diastolic blood pressure    | 1  | MD: 0.90 (-0.38, 2.18)     | NA       |
| Rees et al. 2013b <sup>42</sup>   | Selenium supplements        | All-cause mortality            | 2  | RR: 0.97 (0.88, 1.08)    | 0/ 0.00  | Jayedi et al. 2018 <sup>142</sup>         | Selenium intake             | All-cause mortality         | 3  | RR: 0.79 (0.73, 0.85)      | 0/ 0.00  |
| Rees et al. 2013b <sup>42</sup>   | Selenium supplements        | Cardiovascular mortality       | 2  | RR: 0.97 (0.79, 1.20)    | 44/ 0.03 | Xiang et al. 2019 <sup>143</sup>          | Selenium status             | Cardiovascular mortality    | 3  | RR: 0.77 (0.63, 0.94)      | 6/ 0.00  |
| Rees et al. 2013b <sup>42</sup>   | Selenium supplements        | Combined cardiovascular events | 2  | RR: 1.03 (0.95, 1.11)    | 0/ 0.00  | Zhang et al. 2016a <sup>43</sup>          | Selenium status             | Cardiovascular disease      | 14 | RR: 0.87 (0.76, 0.99)      | 4/ 0.00  |
| Rees et al. 2019 <sup>3</sup>     | Mediterranean diet (intake) | High Density Lipoprotein       | 6  | MD: 0.02 (-0.01, 0.04)   | 0        | Kastorini et al. 2011 <sup>41</sup>       | Mediterranean diet (intake) | High Density Lipoprotein    | 1  | MD: 0.01 (-0.046, 0.061)   | NA       |
| Rees et al. 2019 <sup>3</sup>     | Mediterranean diet (intake) | Triglycerides                  | 7  | MD: -0.09 (-0.16, -0.01) | 16       | Kastorini et al. 2011 <sup>41</sup>       | Mediterranean diet (intake) | Triglycerides               | 1  | MD: -0.023 (-0.076, 0.031) | NA       |
| Rees et al. 2019 <sup>3</sup>     | Mediterranean diet (intake) | Systolic blood pressure        | 4  | MD: -1.50 (-3.92, 0.92)  | 16       | Kastorini et al. 2011 <sup>41</sup>       | Mediterranean diet (intake) | Systolic blood pressure     | 1  | MD: 0.80 (-0.84, 2.44)     | NA       |
| Rees et al. 2019 <sup>3</sup>     | Mediterranean diet (intake) | Cardiovascular mortality       | 1  | HR: 0.81 (0.50, 1.32)    | NA       | Rosato et al. 2019 <sup>44</sup>          | Mediterranean diet (intake) | Cardiovascular mortality    | 7  | RR: 0.73 (0.67, 0.81)      | 47/ 0.01 |
| Rees et al. 2019 <sup>3</sup>     | Mediterranean diet (intake) | Combined cardiovascular events | 1  | HR: 0.70 (0.58, 0.85)    | NA       | Rosato et al. 2019 <sup>44</sup>          | Mediterranean diet (intake) | Cardiovascular disease      | 11 | RR: 0.81 (0.74, 0.88)      | 80/ 0.01 |
| Rees et al. 2019 <sup>3</sup>     | Mediterranean diet (intake) | All-cause mortality            | 1  | HR: 1.00 (0.81, 1.24)    | NA       | Soltani et al. 2019 <sup>144</sup>        | Mediterranean diet (intake) | All-cause mortality         | 26 | RR: 0.90 (0.89, 0.91)      | 80/ 0.00 |
| Rutjes et al. 2018 <sup>10</sup>  | B-Vitamin supplements       | Dementia / MCI                 | 1  | RR: 1.01 (0.69, 1.48)    | NA       | Doets et al. 2013 <sup>145</sup>          | Vitamin B12 intake          | Dementia                    | 3  | RR: 0.99 (0.99, 1.00)      | 22/ 0.00 |
| Rutjes et al. 2018 <sup>10</sup>  | Vitamin D3 supplements      | Dementia                       | 1  | RR: 1.09 (0.70, 1.71)    | NA       | Goodwill et al. 2017 <sup>9</sup>         | Vitamin D status            | Dementia / MCI              | 14 | OR: 0.88 (0.81, 0.95)      | 56/ 0.01 |
| Tieu et al. 2017 <sup>12</sup>    | Healthy diet (intake)       | Preterm birth                  | 3  | RR: 0.51 (0.21, 1.25)    | 0/ 0.00  | Chia et al. 2019 <sup>11</sup>            | Healthy diet (intake)       | Preterm birth               | 5  | OR: 0.81 (0.69, 0.94)      | 31/ 0.01 |
| Tieu et al. 2017 <sup>12</sup>    | Healthy diet (intake)       | Small gestational age          | 2  | RR: 0.84 (0.49, 1.42)    | 0/ 0.00  | Chia et al. 2019 <sup>11</sup>            | Healthy diet (intake)       | Small gestational age       | 8  | OR: 0.88 (0.71, 1.08)      | 36/ 0.03 |
| Tieu et al. 2017 <sup>12</sup>    | Healthy diet (intake)       | Birth weight                   | 5  | MD: 5.94 (-51.11, 62.99) | 0        | Chia et al. 2019 <sup>11</sup>            | Healthy diet (intake)       | Birth weight                | 12 | MD: -9.61 (-53.12, 33.91)  | 86       |
| Tieu et al. 2017 <sup>12</sup>    | Healthy diet (intake)       | Gestational diabetes           | 5  | RR: 0.60 (0.35, 1.04)    | 54/ 0.18 | Mijatovic-Vukas et al. 2018 <sup>13</sup> | Mediterranean diet (intake) | Gestational diabetes        | 4  | OR: 0.70 (0.62, 0.80)      | 6/ 0.00  |
| Vinceti et al. 2018 <sup>14</sup> | Selenium supplements        | Cancer                         | 5  | RR: 0.99 (0.86, 1.14)    | 46/ 0.01 | Vinceti et al. 2018 <sup>14</sup>         | Selenium status             | Cancer                      | 7  | OR: 0.72 (0.55, 0.93)      | 46/ 0.06 |
| Vinceti et al. 2018 <sup>14</sup> | Selenium supplements        | Cancer mortality               | 2  | RR: 0.81 (0.49, 1.32)    | 79/ 0.10 | Vinceti et al. 2018 <sup>14</sup>         | Selenium intake             | Cancer mortality            | 1  | OR: 0.93 (0.83, 1.04)      | NA       |
| Vinceti et al. 2018 <sup>14</sup> | Selenium supplements        | Colorectal cancer              | 3  | RR: 0.74 (0.41, 1.33)    | 48/ 0.13 | Vinceti et al. 2018 <sup>14</sup>         | Selenium supplements        | Colorectal cancer           | 1  | OR: 0.80 (0.68, 0.94)      | NA       |

### Supplementary data

|                               |              |                    |   |                       |         |                                 |              |                    |    |                       |          |
|-------------------------------|--------------|--------------------|---|-----------------------|---------|---------------------------------|--------------|--------------------|----|-----------------------|----------|
| Yao et al. 2017 <sup>45</sup> | Fibre intake | Colorectal cancer  | 2 | RR: 2.70 (1.07, 6.85) | 0/ 0.00 | Aune et al. 2011 <sup>150</sup> | Fibre intake | Colorectal cancer  | 19 | RR: 0.88 (0.82, 0.94) | 4/ 0.00  |
| Yao et al. 2017 <sup>45</sup> | Fibre intake | Colorectal adenoma | 5 | RR: 1.04 (0.95, 1.13) | 4/ 0.00 | Ben et al. 2014 <sup>46</sup>   | Fibre intake | Colorectal adenoma | 4  | RR: 0.92 (0.76, 1.10) | 33/ 0.01 |

HR: hazard ratio; MCI: mild cognitive impairment; MD: mean difference; N: no; NA: not applicable; NR: not reported; OR: odds ratio; RR: risk ratio; Y: yes; 95% CI: 95% confidence interval.



## Supplementary data

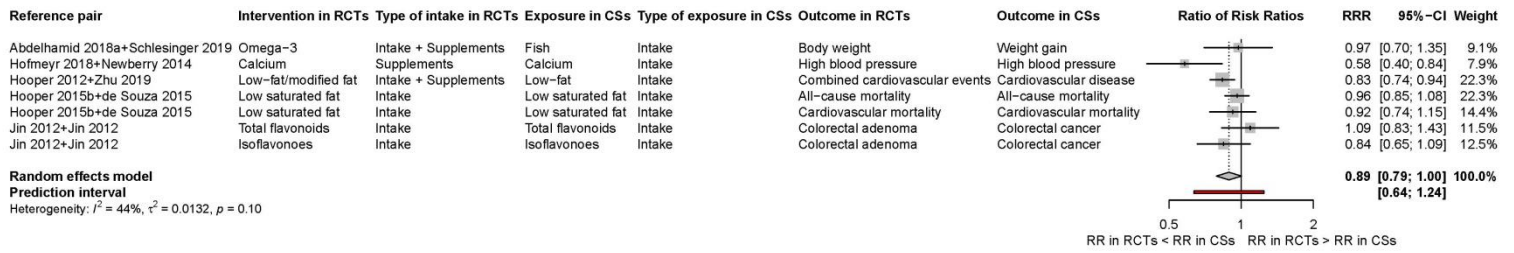

Supplementary Figure 4: Forest plot of comparisons between bodies of evidence from randomized controlled trials vs. cohort studies for dichotomous outcomes as pooled ratio of risk ratios (RRR) including only CSs with a  $RR \geq 1$ .

CS: cohort studies; RCTs: randomized controlled trials; RR: risk ratio; RRR: ratio of risk ratios;

## Supplementary data

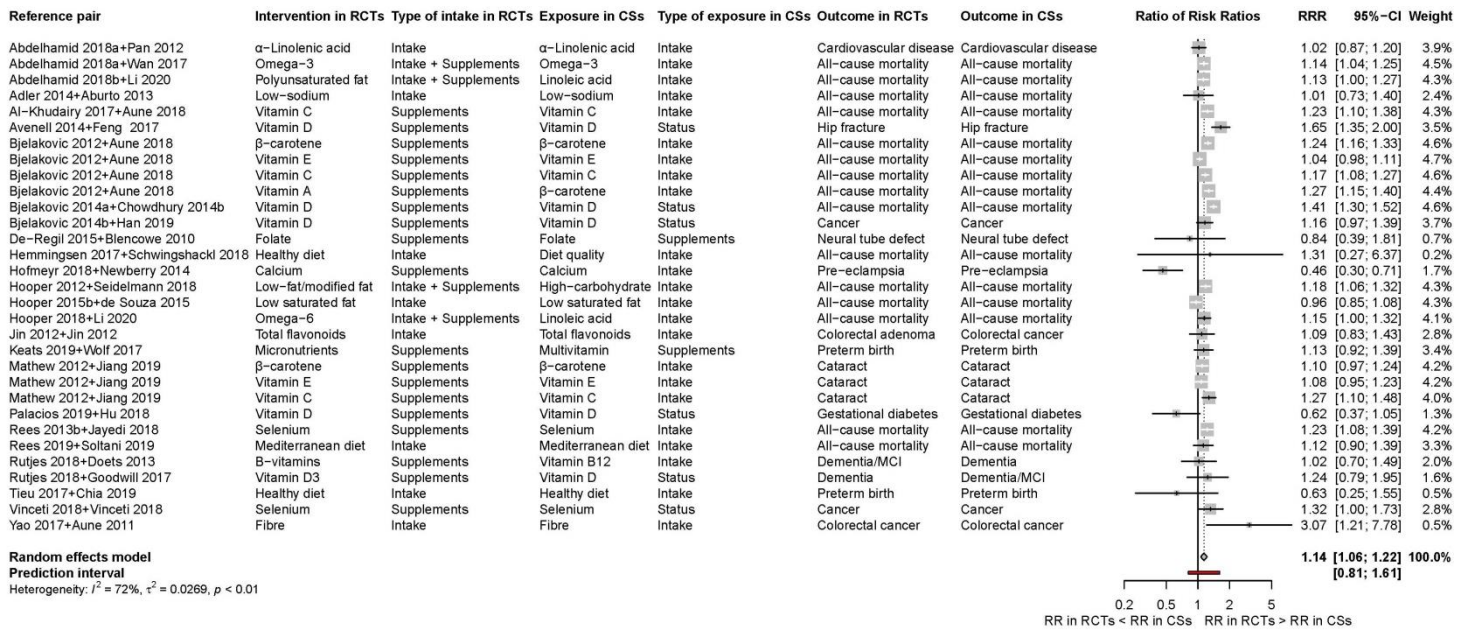

Supplementary Figure 5: Forest plot of comparisons: Sensitivity analysis (where only one outcome with the largest number of RCTs) for bodies of evidence from randomized controlled trials vs. cohort studies for dichotomous outcomes as pooled ratio of risk ratios (RRR).

CS: cohort studies; RCTs: randomized controlled trials; RR: risk ratio; RRR: ratio of risk ratios;



## Supplementary data

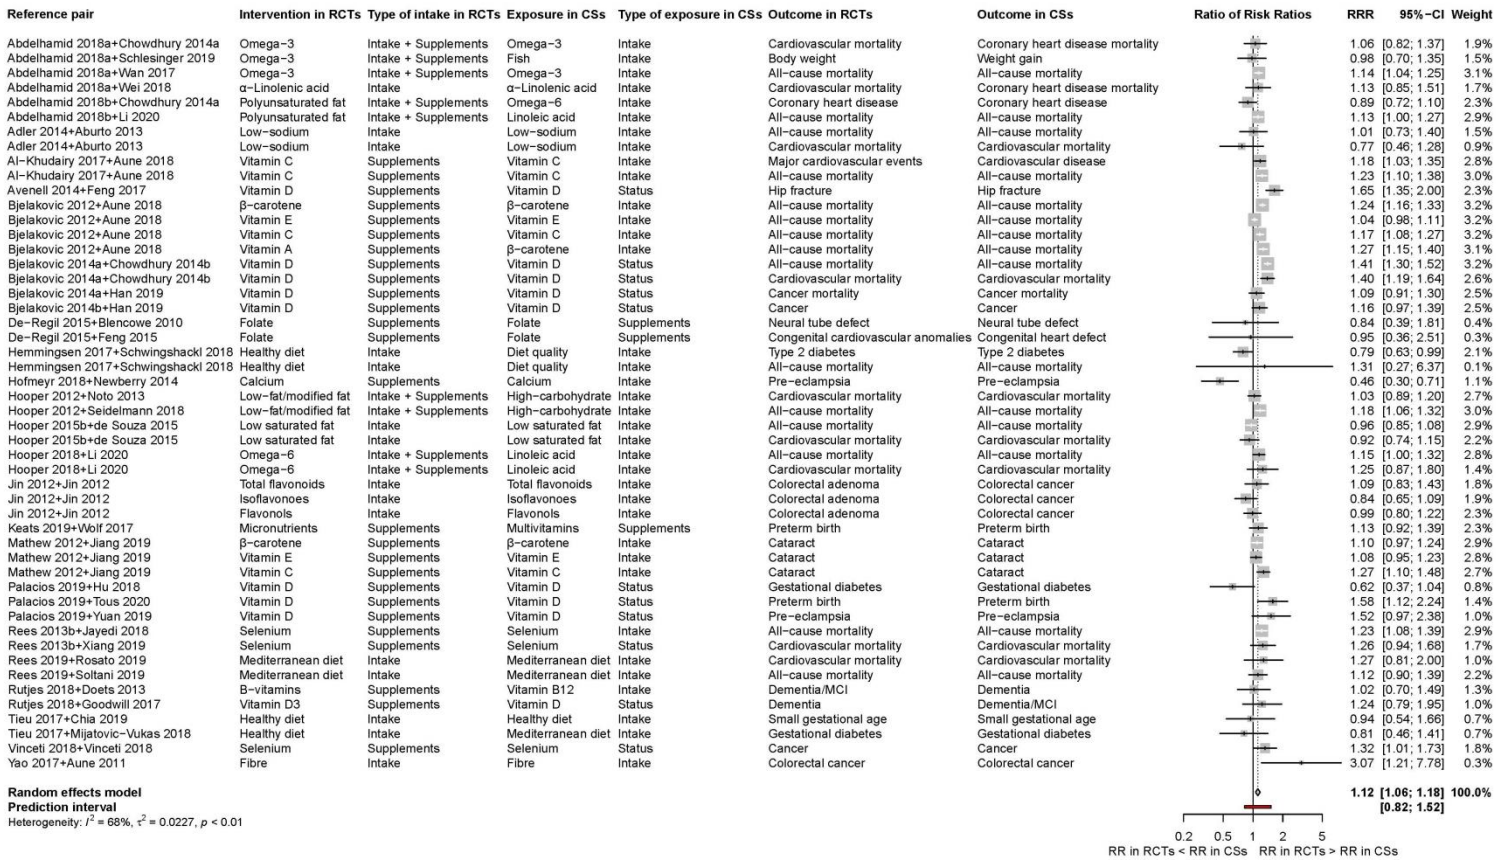

Supplementary Figure 6: Forest plot of comparisons between bodies of evidence from randomized controlled trials vs. cohort studies for dichotomous outcomes as pooled ratio of risk ratios (RRR) excluding highly correlated outcomes.

CS: cohort studies; RCTs: randomized controlled trials; RR: risk ratio; RRR: ratio of risk ratios;

# Supplementary data

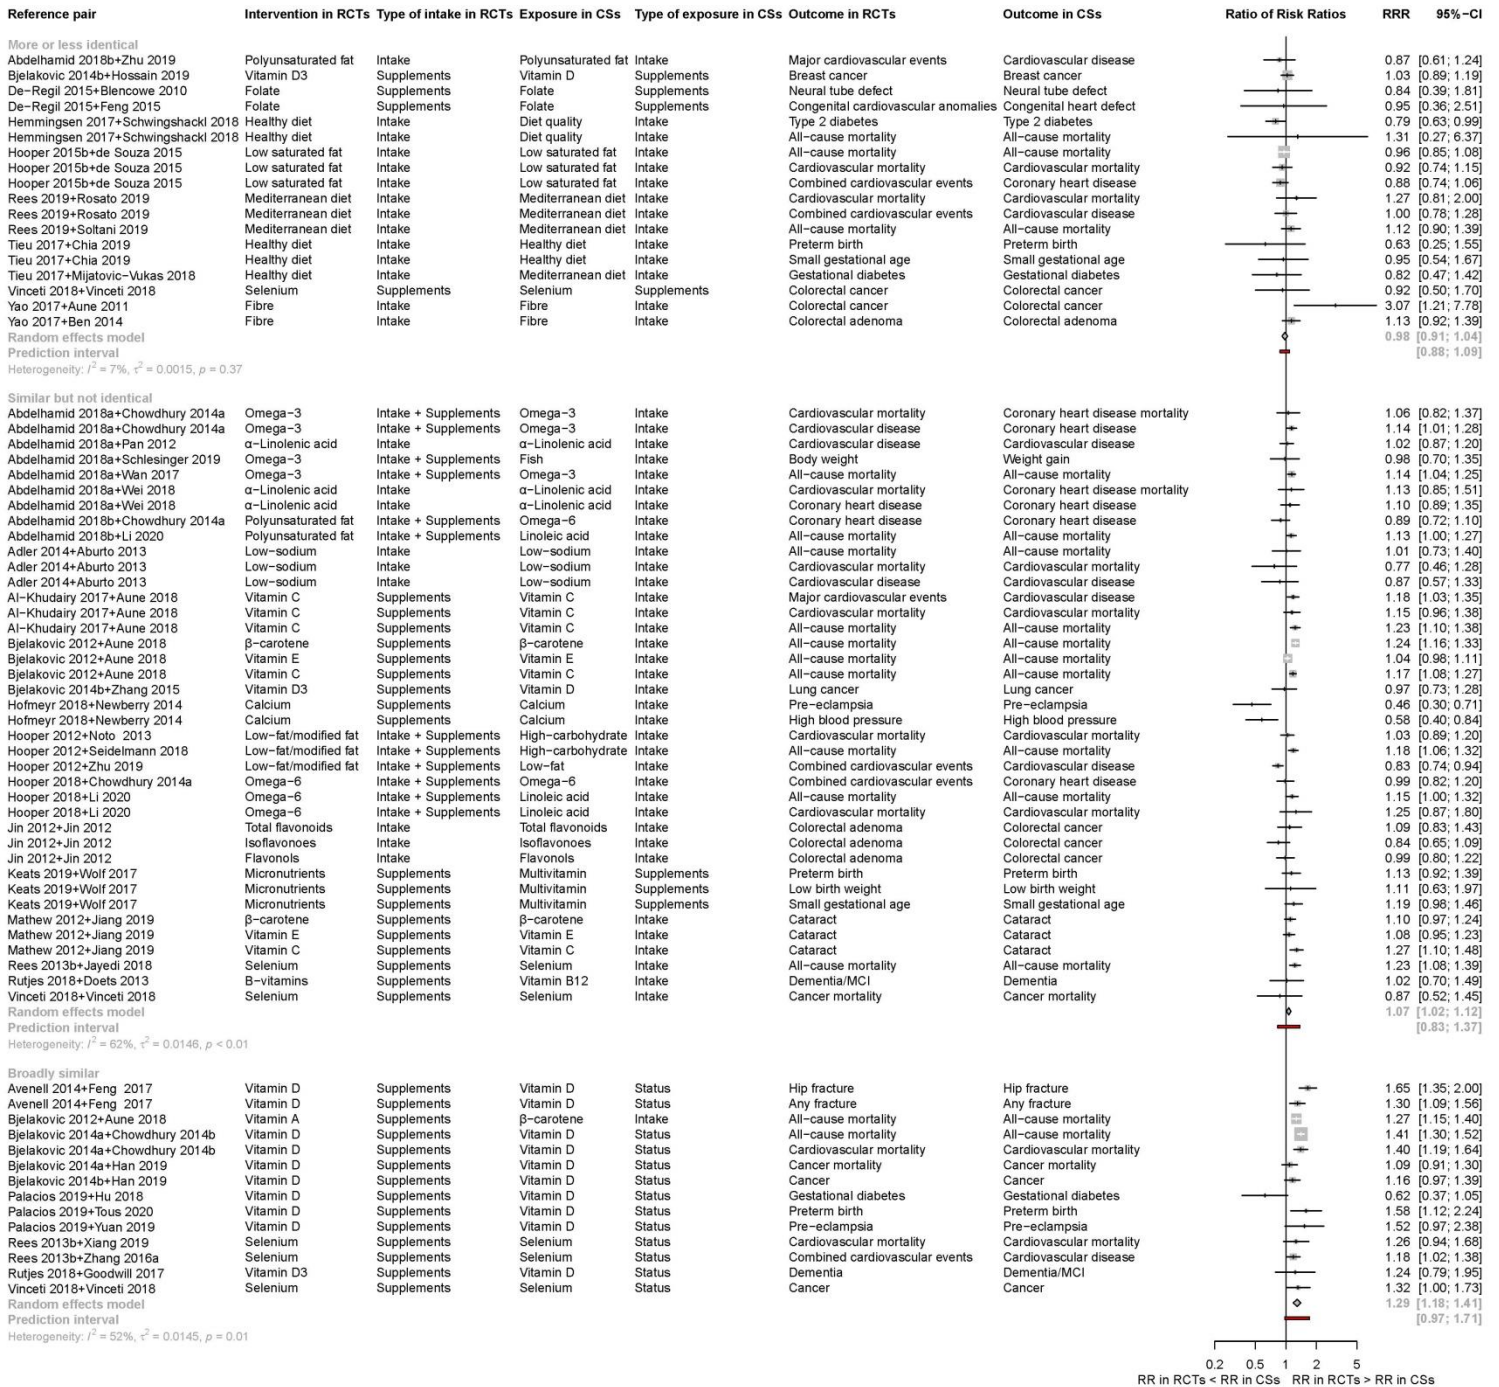

Supplementary Figure 7: Forest plot of comparisons between bodies of evidence from randomized controlled trials vs. cohort studies for dichotomous outcomes as pooled ratio of risk ratios (RRR) stratified by intervention/exposure similarity degree.

CS: cohort studies; RCTs: randomized controlled trials; RR: risk ratio; RRR: ratio of risk ratios;

## Supplementary data

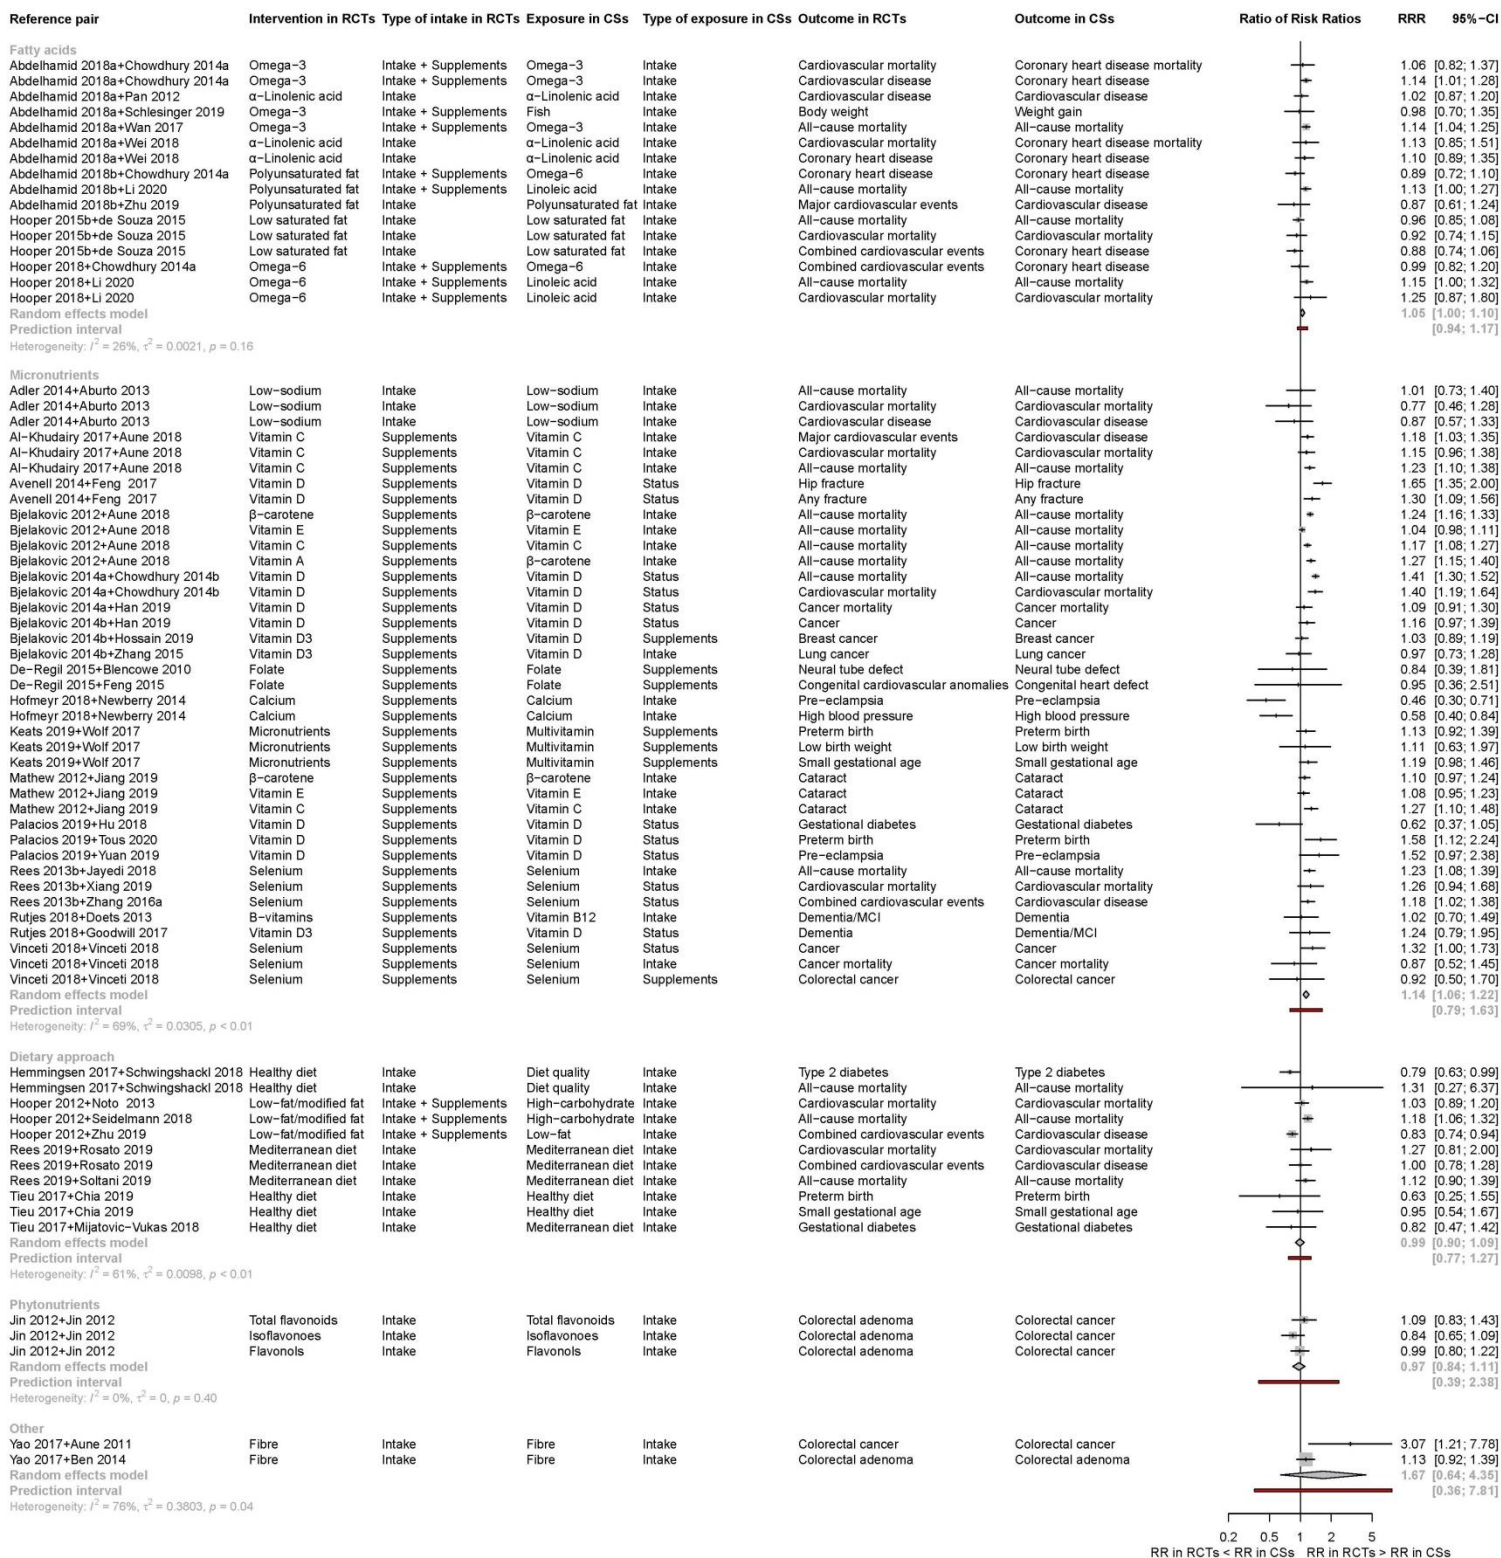

Supplementary Figure 8: Forest plot of comparisons between bodies of evidence from randomized controlled trials vs. cohort studies for dichotomous outcomes as pooled ratio of risk ratios (RRR) stratified by type of dietary intervention/exposure.

CS: cohort studies; RCTs: randomized controlled trials; RR: risk ratio; RRR: ratio of risk ratios;

## Supplementary data

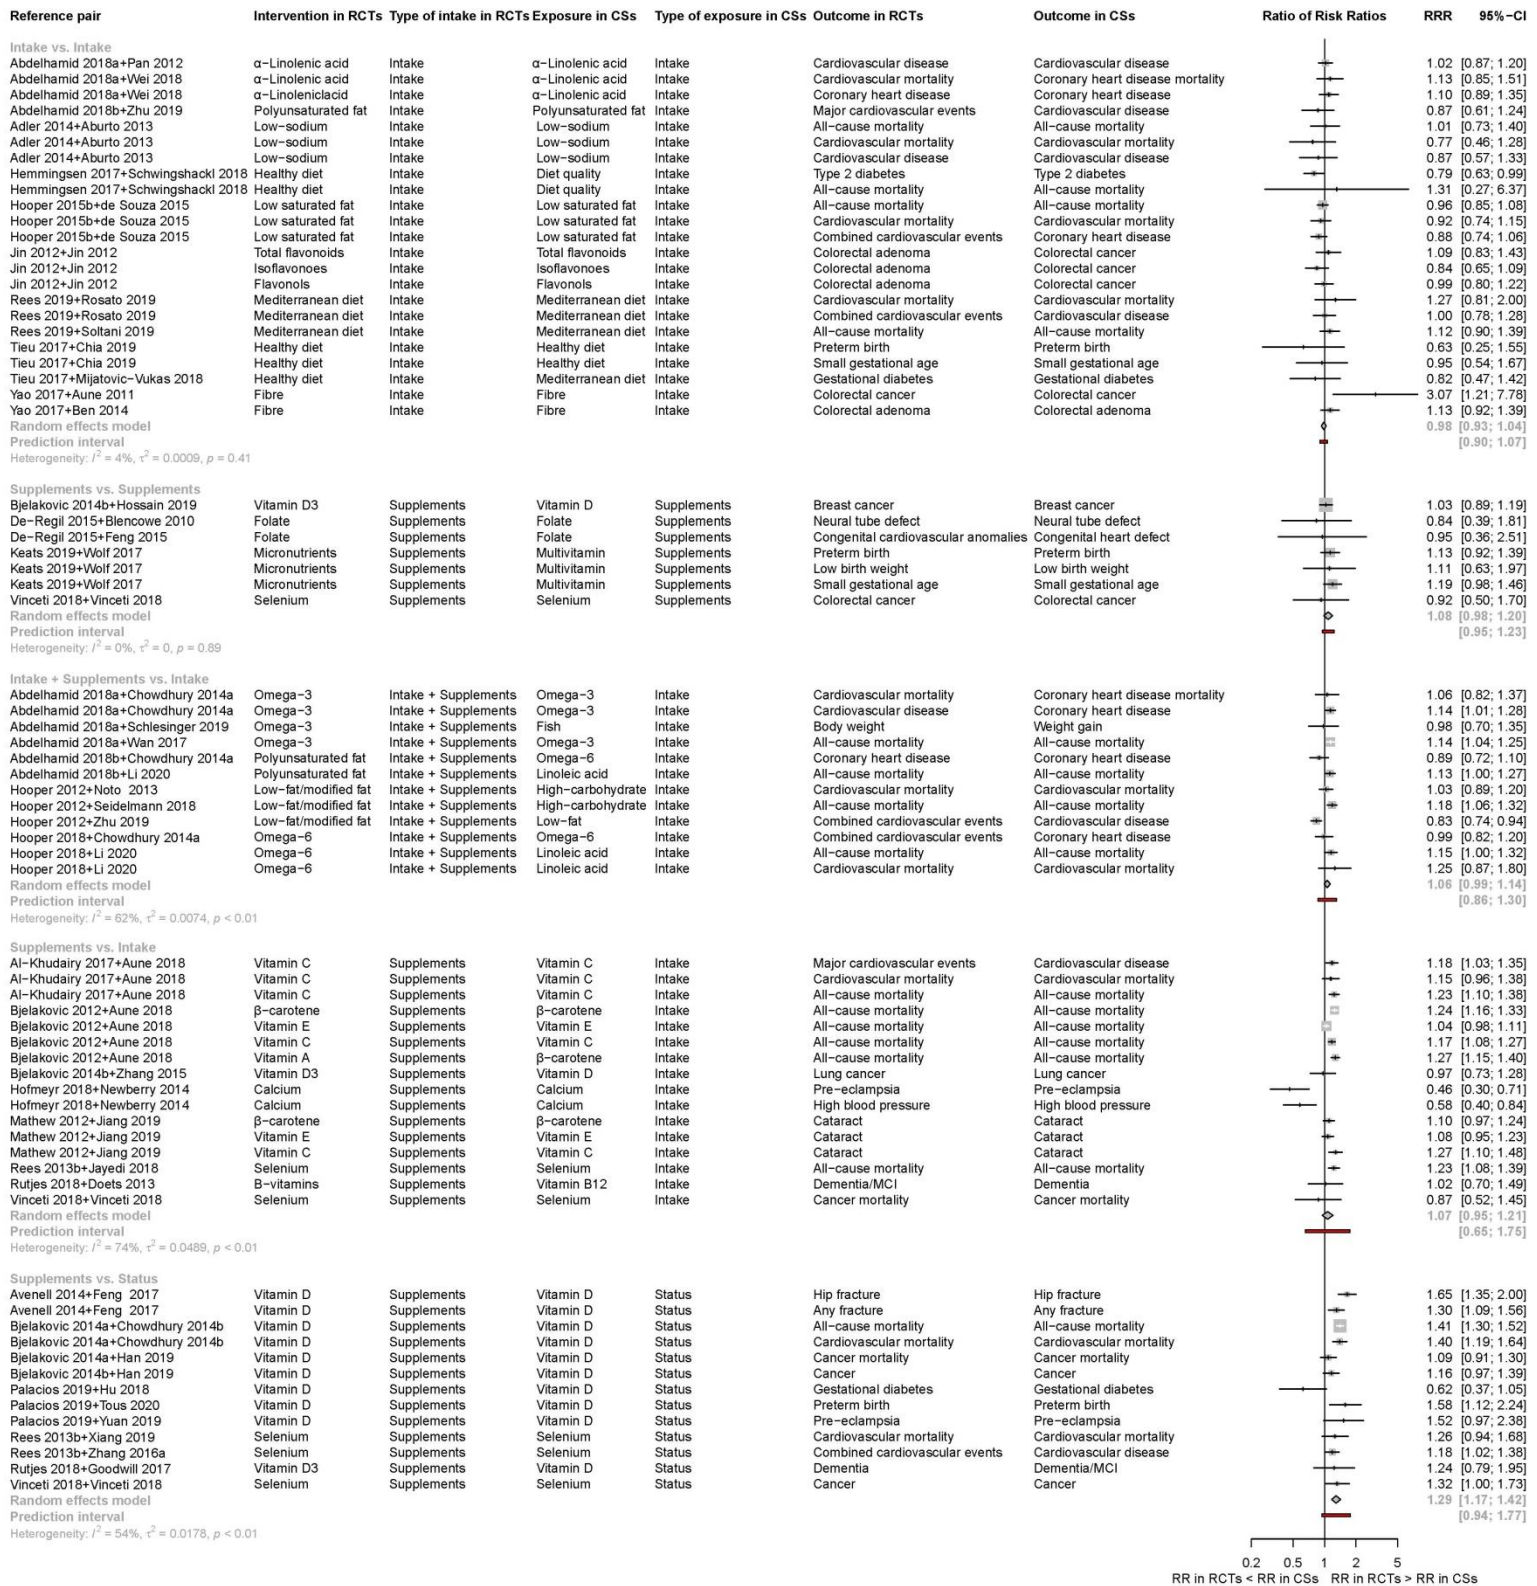

Supplementary Figure 9: Forest plot of comparisons between bodies of evidence from randomized controlled trials vs. cohort studies for dichotomous outcomes as pooled ratio of risk ratios (RRR) stratified by type of intake/exposure.

CS: cohort studies; RCTs: randomized controlled trials; RR: risk ratio; RRR: ratio of risk ratios;

## Supplementary data

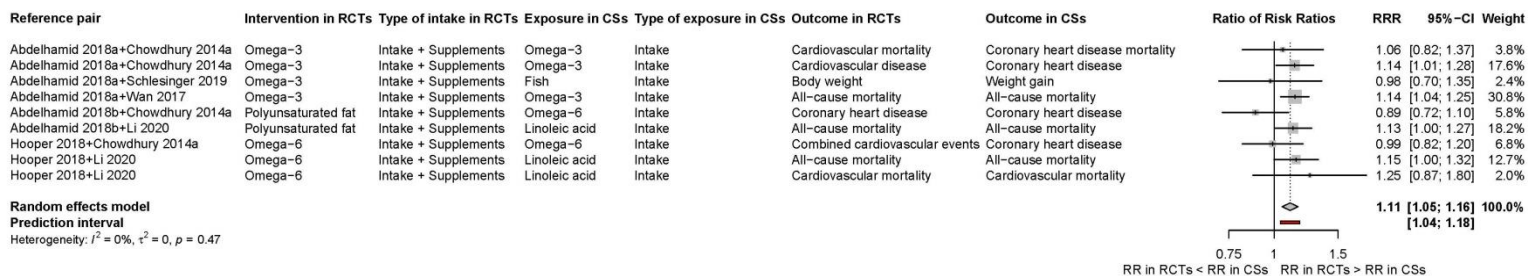

Supplementary Figure 10: Forest plot of comparisons: Sensitivity analysis of n-3, n-6 and PUFA for bodies of evidence from randomized controlled trials (dietary intake + dietary supplements) vs. cohort studies (dietary intake) for dichotomous outcomes as pooled ratio of risk ratios (RRR).

CS: cohort studies; PUFA: polyunsaturated fat; RCTs: randomized controlled trials; RR: risk ratio; RRR: ratio of risk ratios;

## Supplementary data

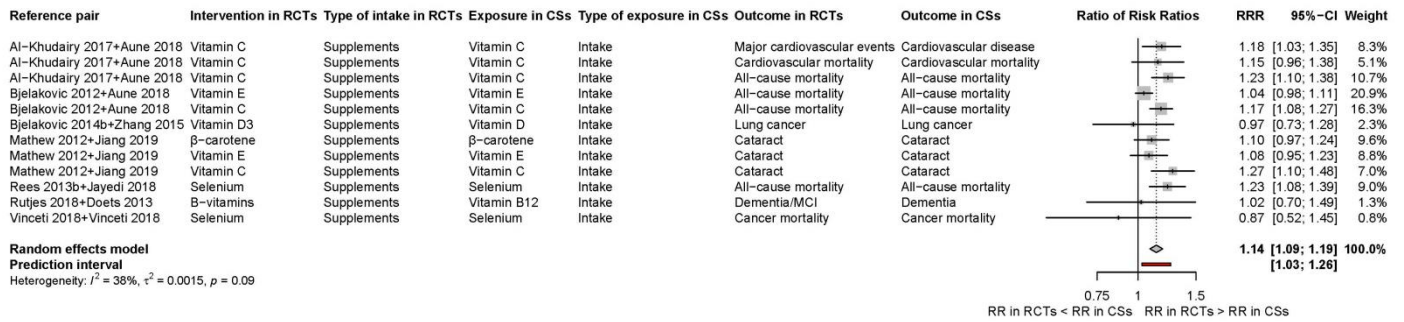

Supplementary Figure 11: Forest plot of comparisons: Sensitivity analysis (excluding pregnancy outcomes, β-carotene, and vitamin A comparisons) for bodies of evidence from randomized controlled trials (dietary supplements) vs. cohort studies (dietary intake) for dichotomous outcomes as pooled ratio of risk ratios (RRR).

CS: cohort studies; RCTs: randomized controlled trials; RR: risk ratio; RRR: ratio of risk ratios;

# Supplementary data

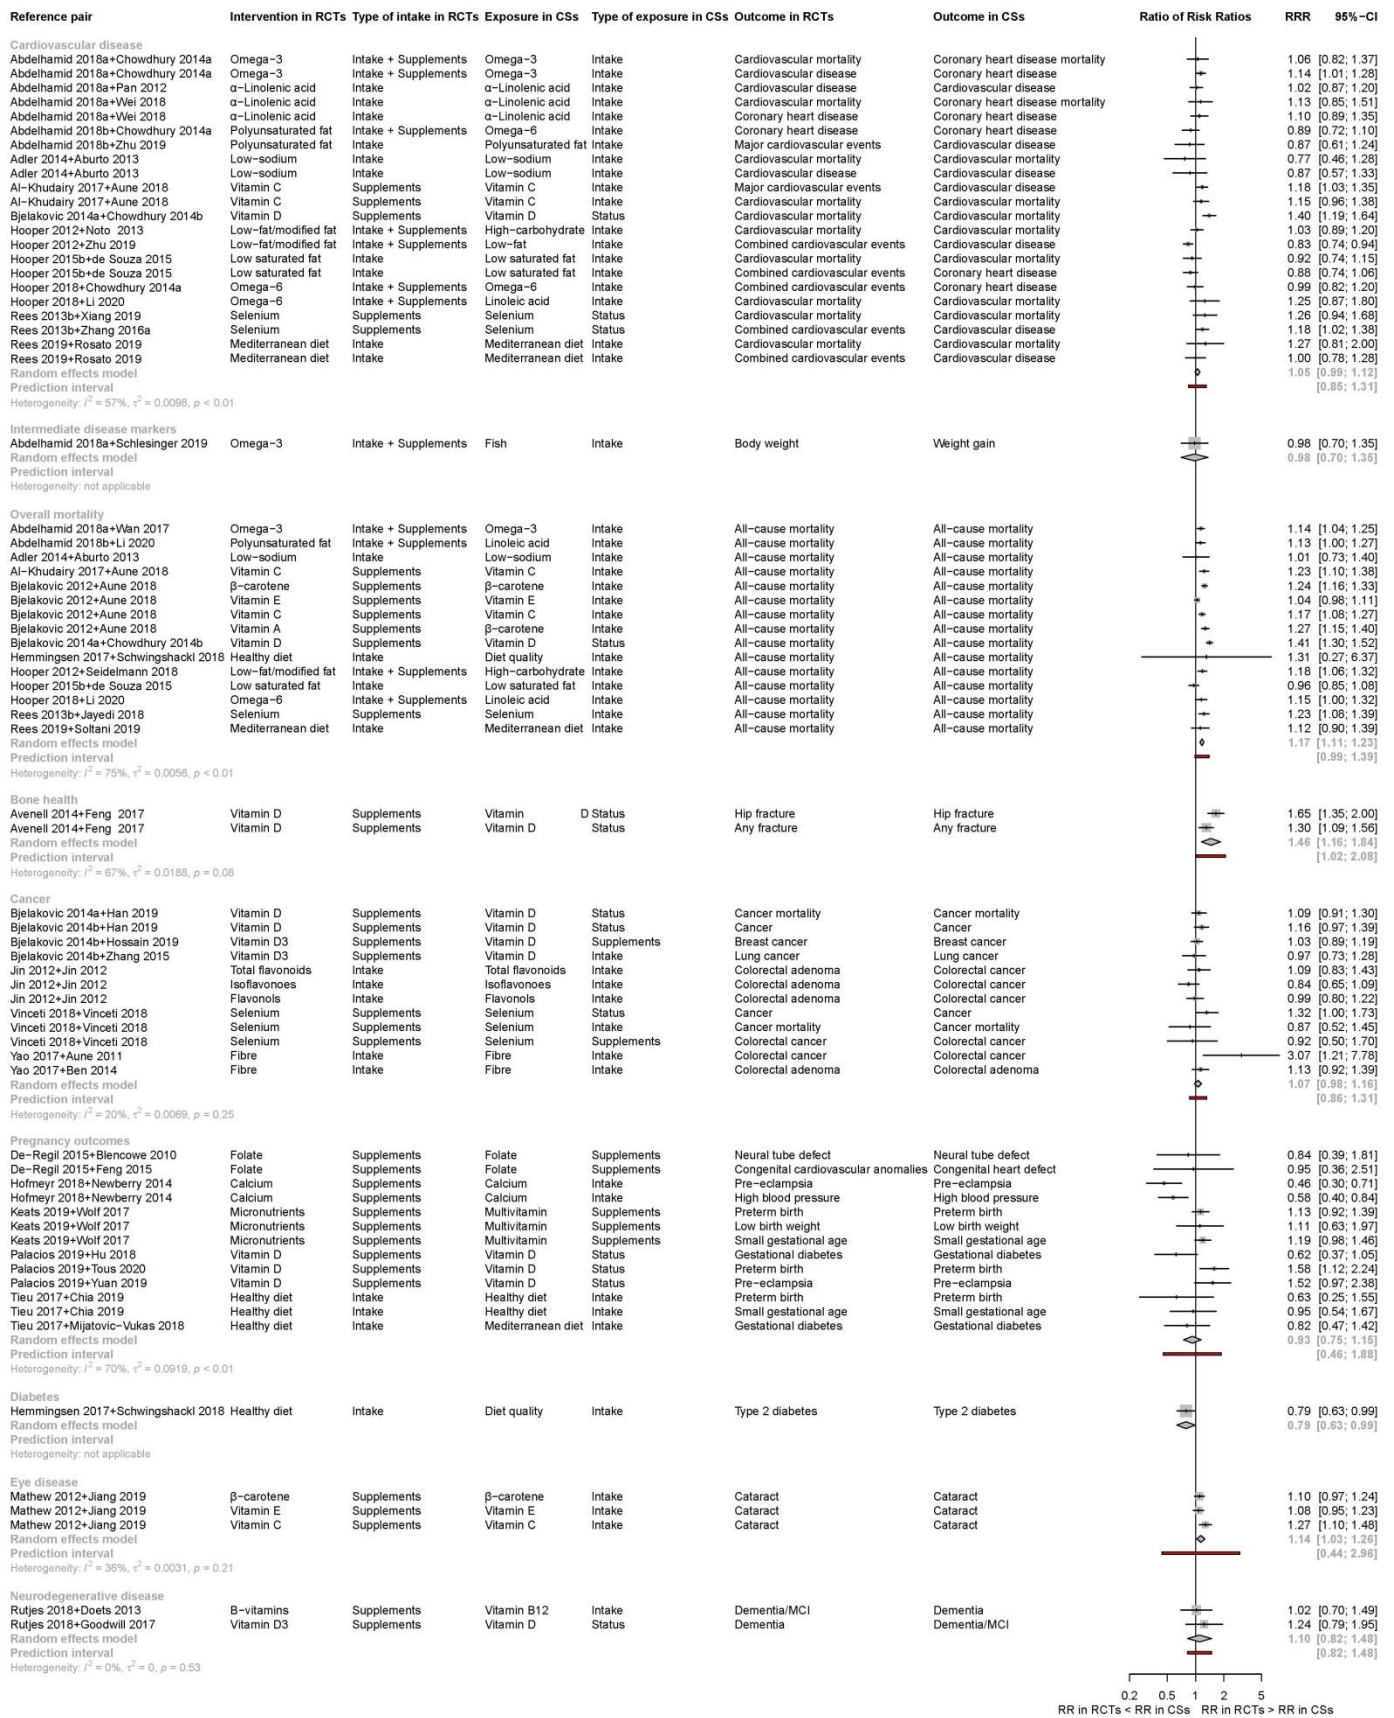

Supplementary Figure 12: Forest plot of comparisons between bodies of evidence from randomized controlled trials vs. cohort studies for dichotomous outcomes as pooled ratio of risk ratios (RRR) stratified by type of outcome.

## Supplementary data

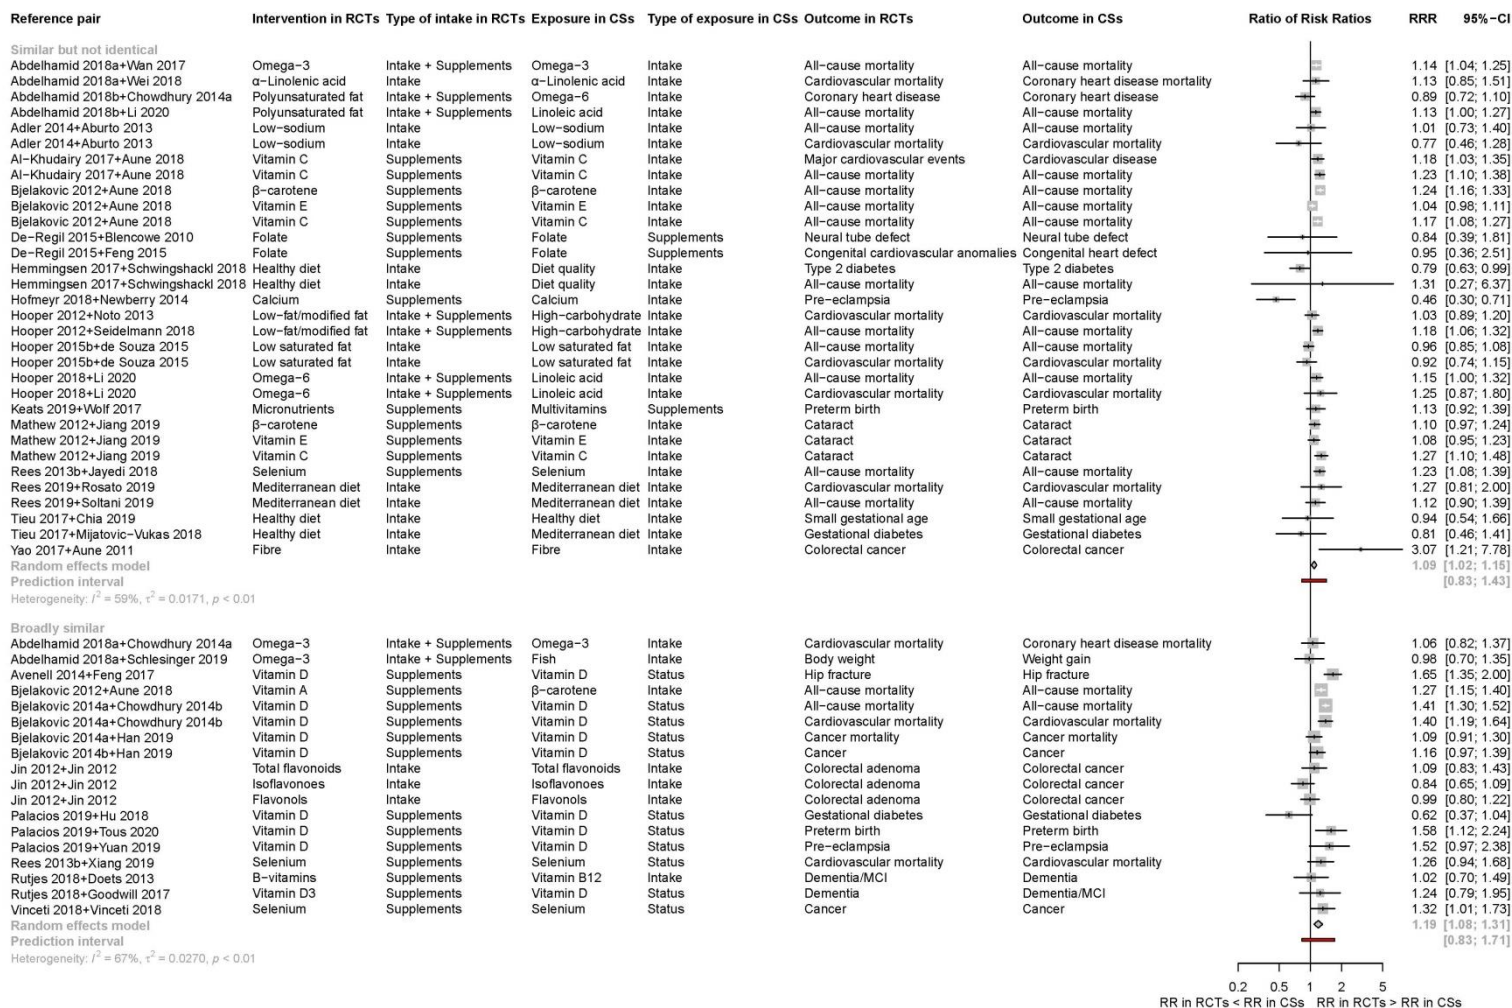

CS: cohort studies; RCTs: randomized controlled trials; RR: risk ratio; RRR: ratio of risk ratios;

Supplementary Figure 13: Forest plot of comparisons between bodies of evidence from randomized controlled trials vs. cohort studies for dichotomous outcomes as pooled ratio of risk ratios (RRR) excluding highly correlated outcomes stratified by PI/ECO similarity degree.

CS: cohort studies; RCTs: randomized controlled trials; RR: risk ratio; RRR: ratio of risk ratios;



## Supplementary data

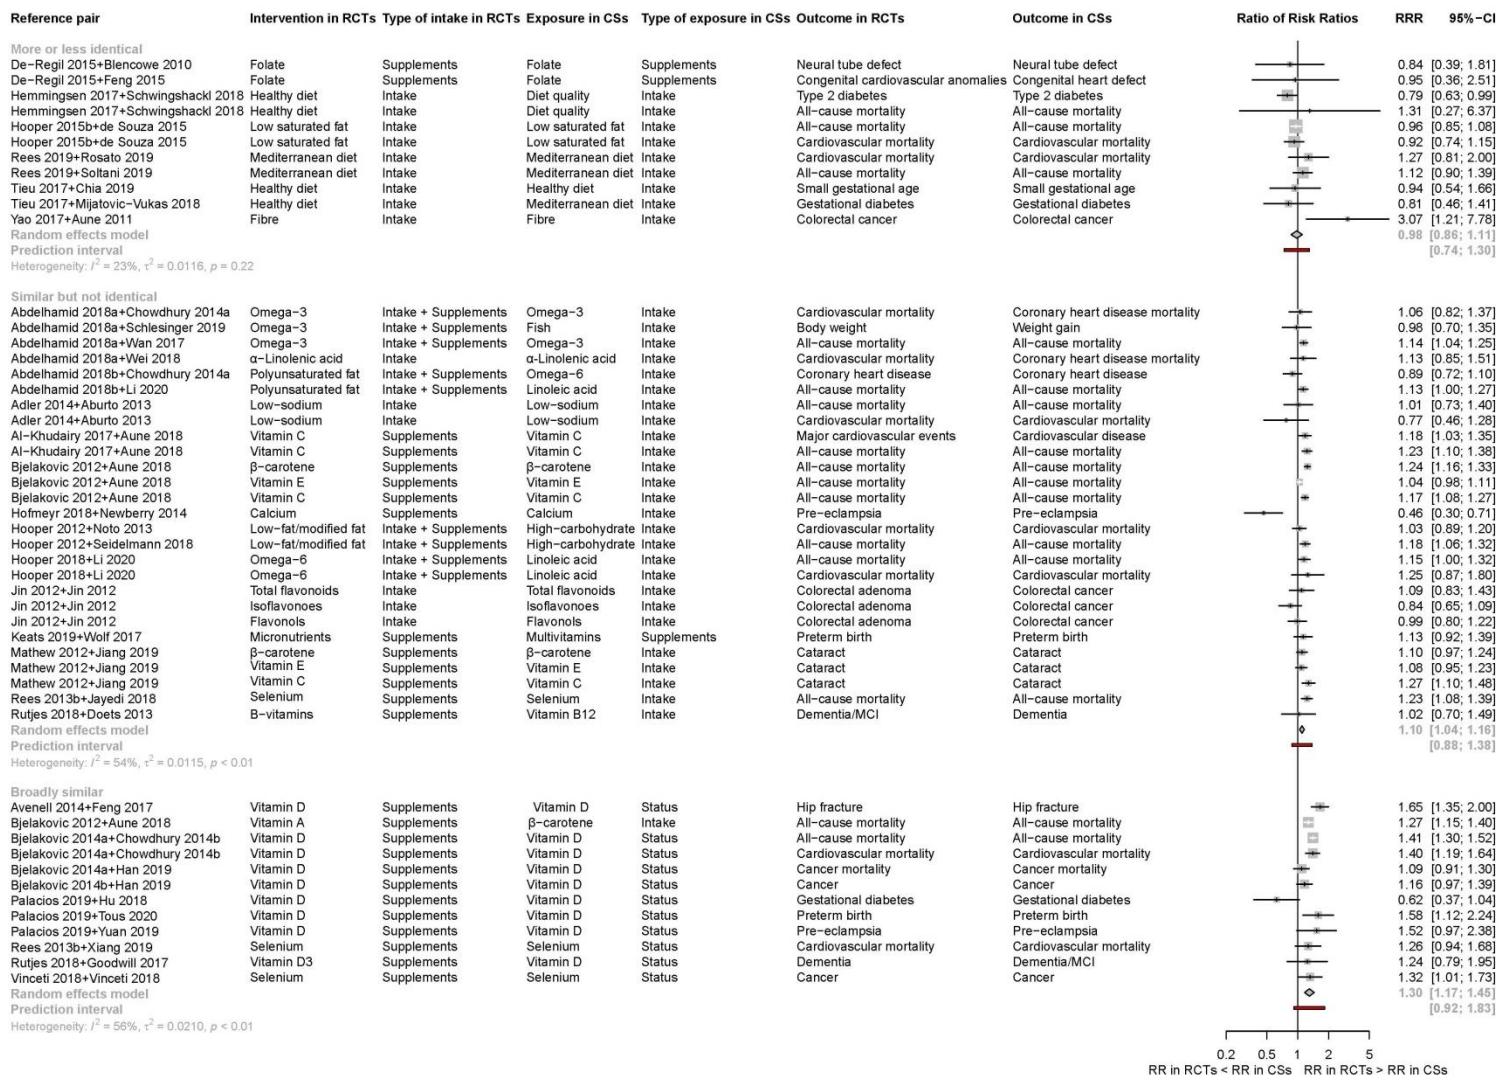

Supplementary Figure 14: Forest plot of comparisons between bodies of evidence from randomized controlled trials vs. cohort studies for dichotomous outcomes as pooled ratio of risk ratios (RRR) excluding highly correlated outcomes stratified by intervention/exposure similarity degree.

CS: cohort studies; RCTs: randomized controlled trials; RR: risk ratio; RRR: ratio of risk ratios;

## Supplementary data

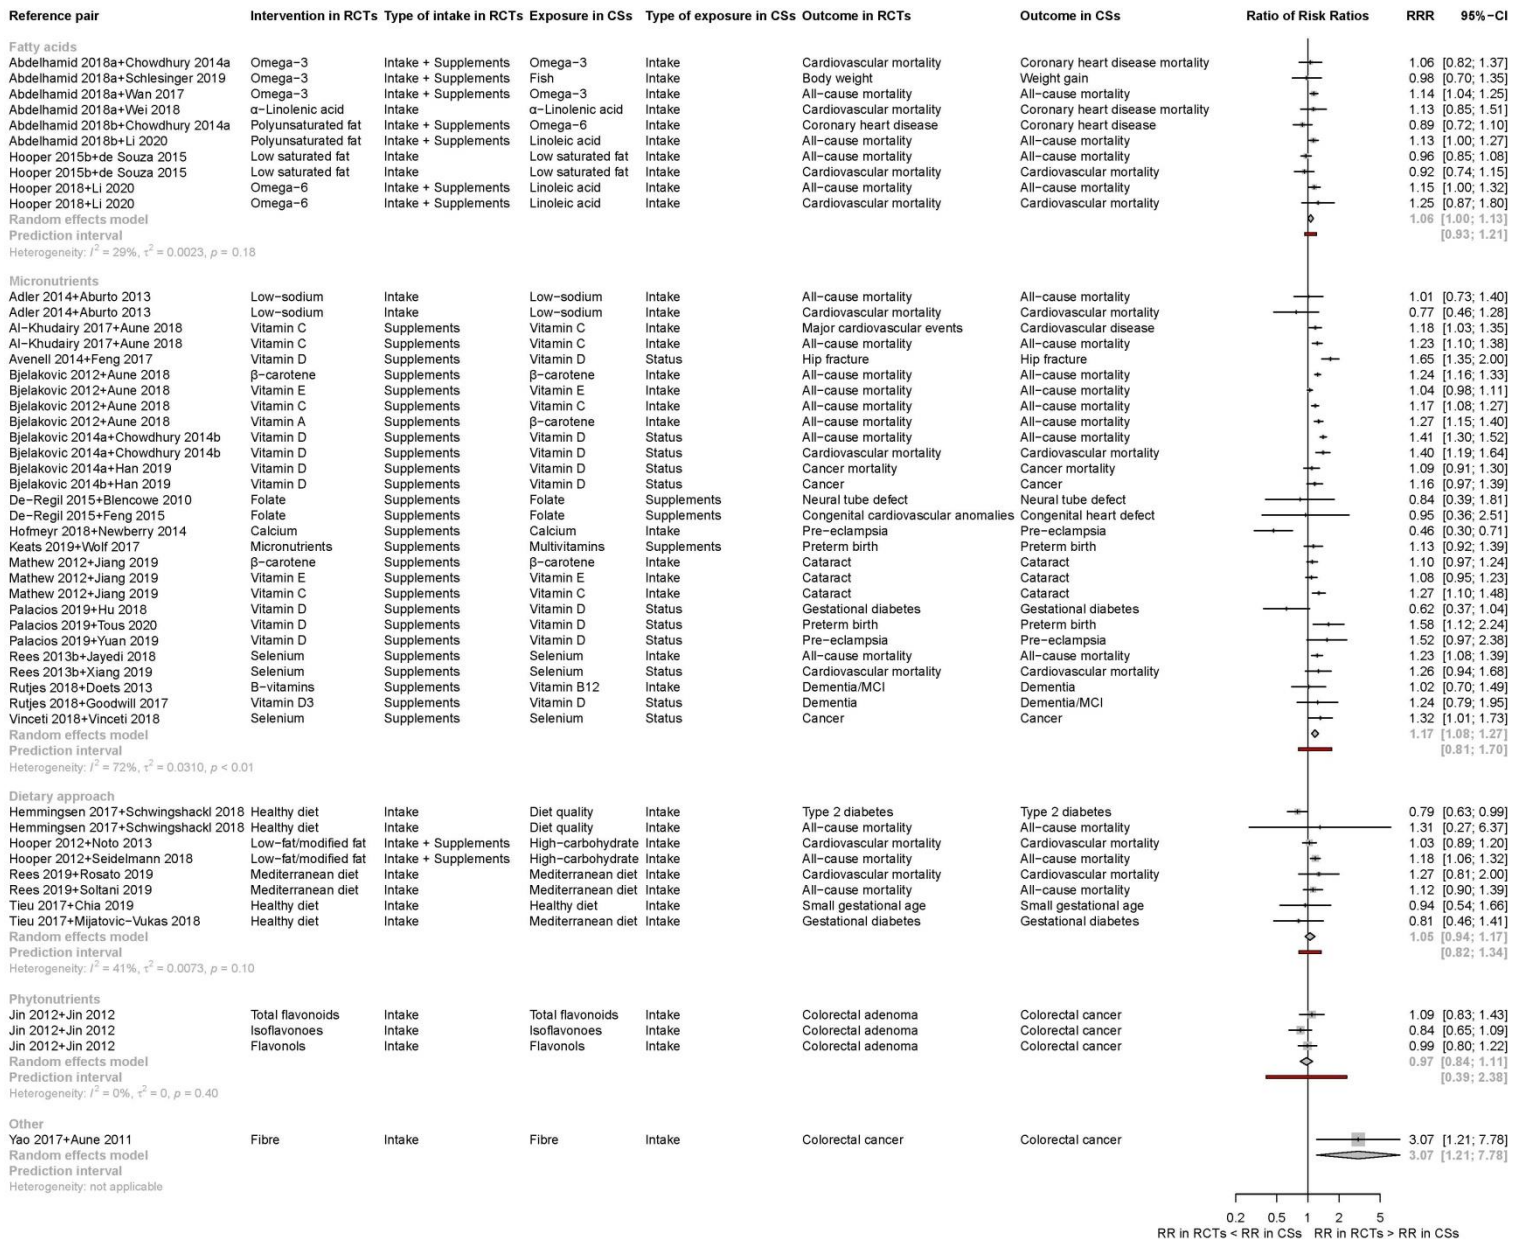

Supplementary Figure 15: Forest plot of comparisons between bodies of evidence from randomized controlled trials vs. cohort studies for dichotomous outcomes as pooled ratio of risk ratios (RRR) excluding highly correlated outcomes stratified by type of dietary intervention/exposure.

CS: cohort studies; RCTs: randomized controlled trials; RR: risk ratio; RRR: ratio of risk ratios;

## Supplementary data

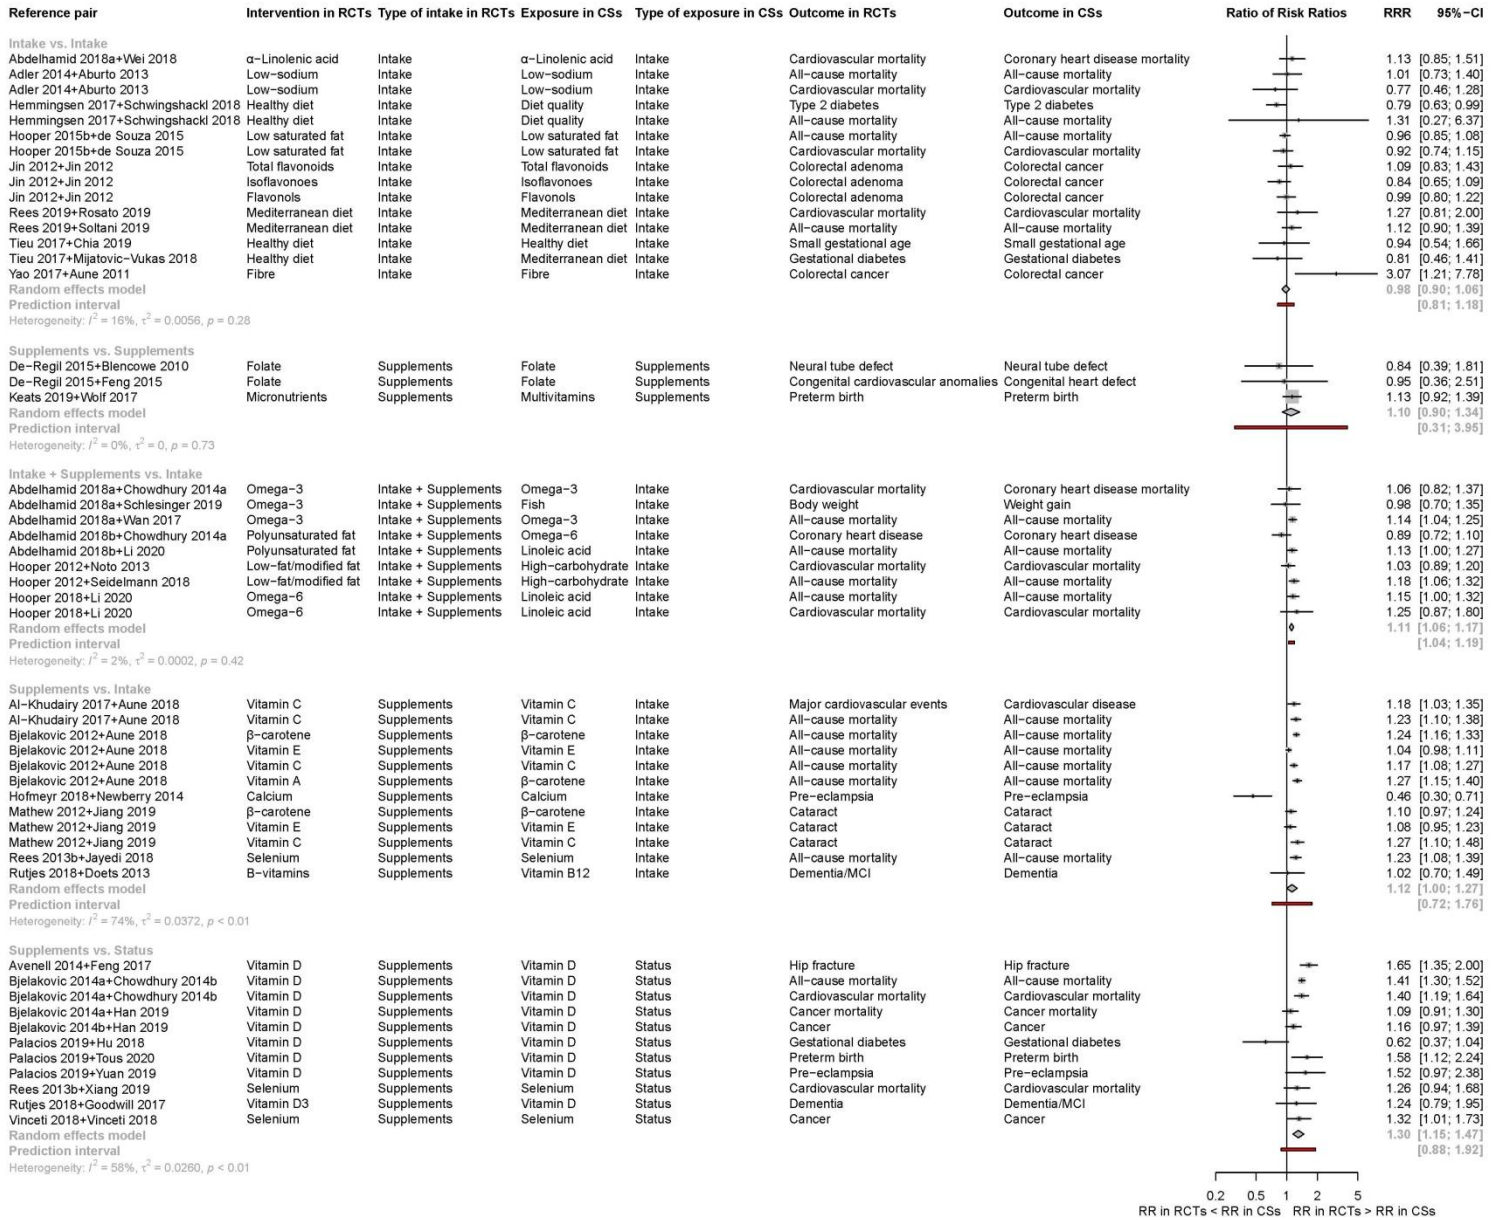

Supplementary Figure 16: Forest plot of comparisons between bodies of evidence from randomized controlled trials vs. cohort studies for dichotomous outcomes as pooled ratio of risk ratios (RRR) excluding highly correlated outcomes stratified by type of intake/exposure.

CS: cohort studies; RCTs: randomized controlled trials; RR: risk ratio; RRR: ratio of risk ratios;

## Supplementary data

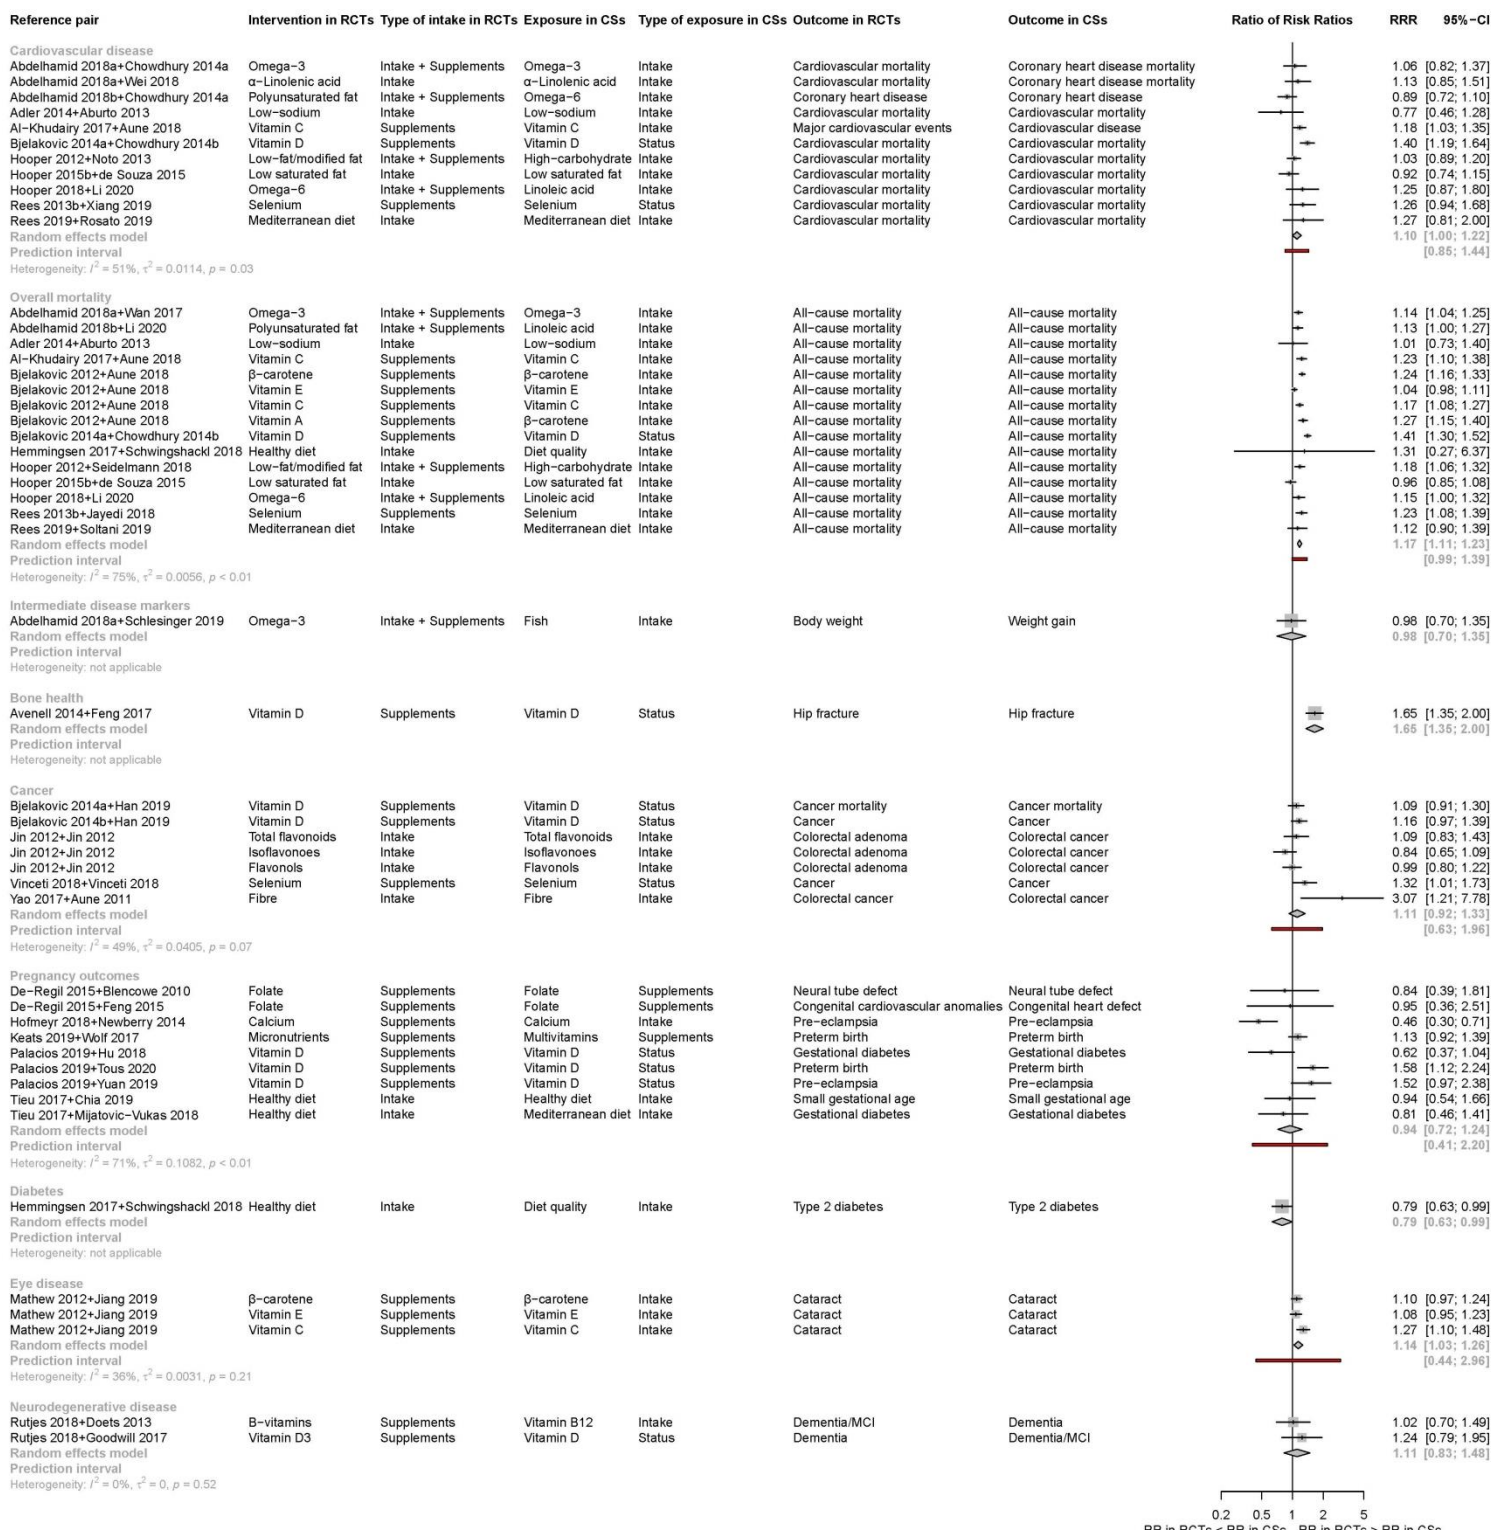

Supplementary Figure 17: Forest plot of comparisons between bodies of evidence from randomized controlled trials vs. cohort studies for dichotomous outcomes as pooled ratio of risk ratios (RRR) excluding highly correlated outcomes stratified by type of outcome.

CS: cohort studies; RCTs: randomized controlled trials; RR: risk ratio; RRR: ratio of risk ratios;

## Supplementary data

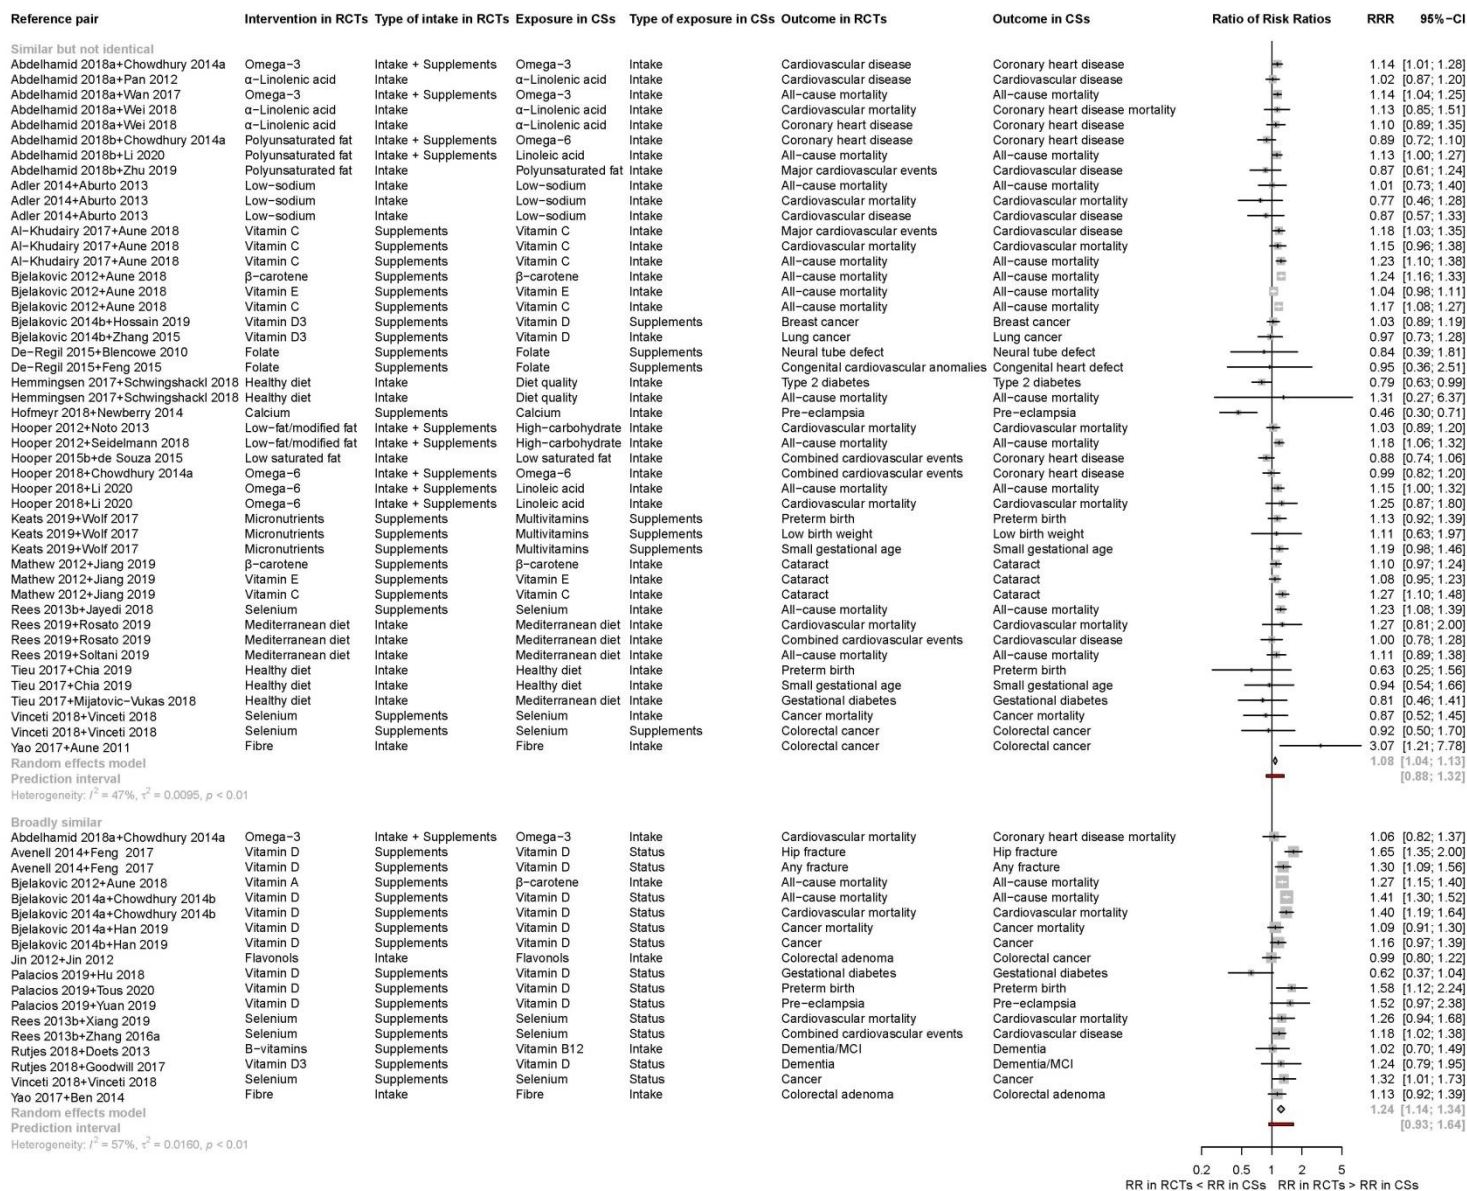

Supplementary Figure 18: Forest plot of comparisons between bodies of evidence from randomized controlled trials vs. cohort studies for dichotomous outcomes as pooled ratio of risk ratios (RRR) including only CSs with a RR <1 stratified by PI/ECO similarity degree.

CS: cohort studies; RCTs: randomized controlled trials; RR: risk ratio; RRR: ratio of risk ratios;

# Supplementary data

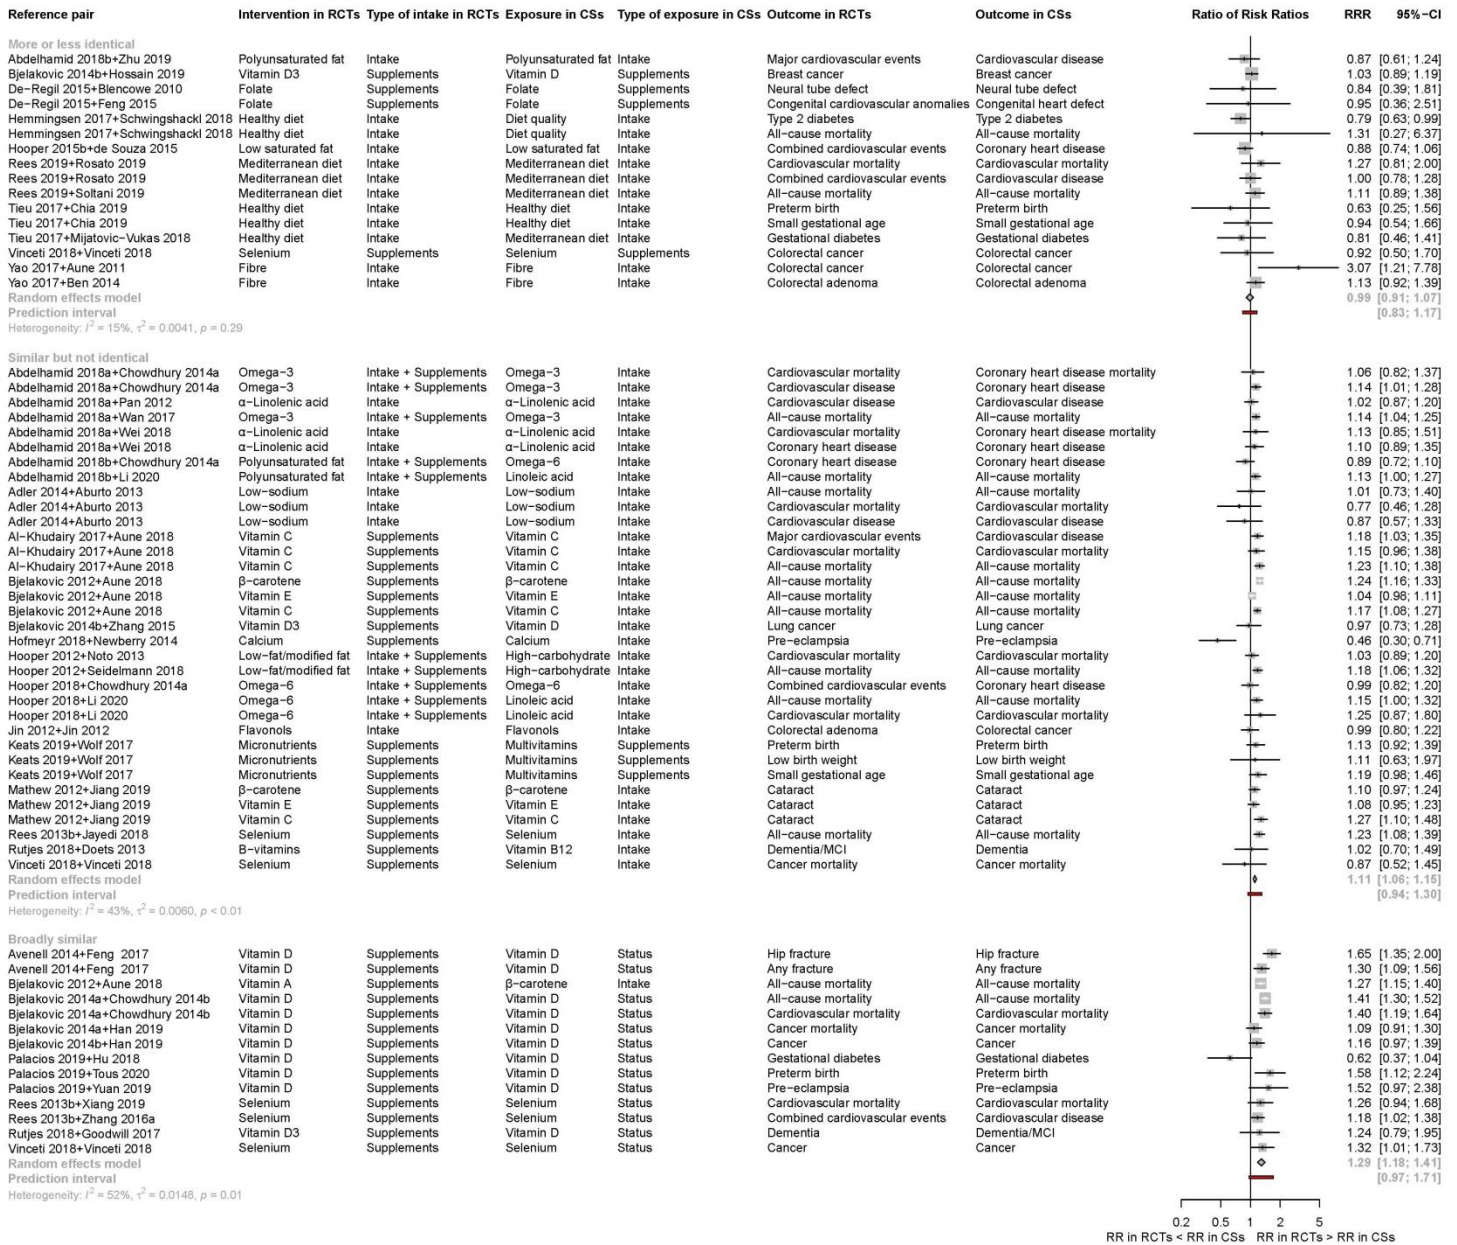

Supplementary Figure 19: Forest plot of comparisons between bodies of evidence from randomized controlled trials vs. cohort studies for dichotomous outcomes as pooled ratio of risk ratios (RRR) including only CSs with a RR <1 stratified by intervention/exposure similarity degree.

CS: cohort studies; RCTs: randomized controlled trials; RR: risk ratio; RRR: ratio of risk ratios;

## Supplementary data

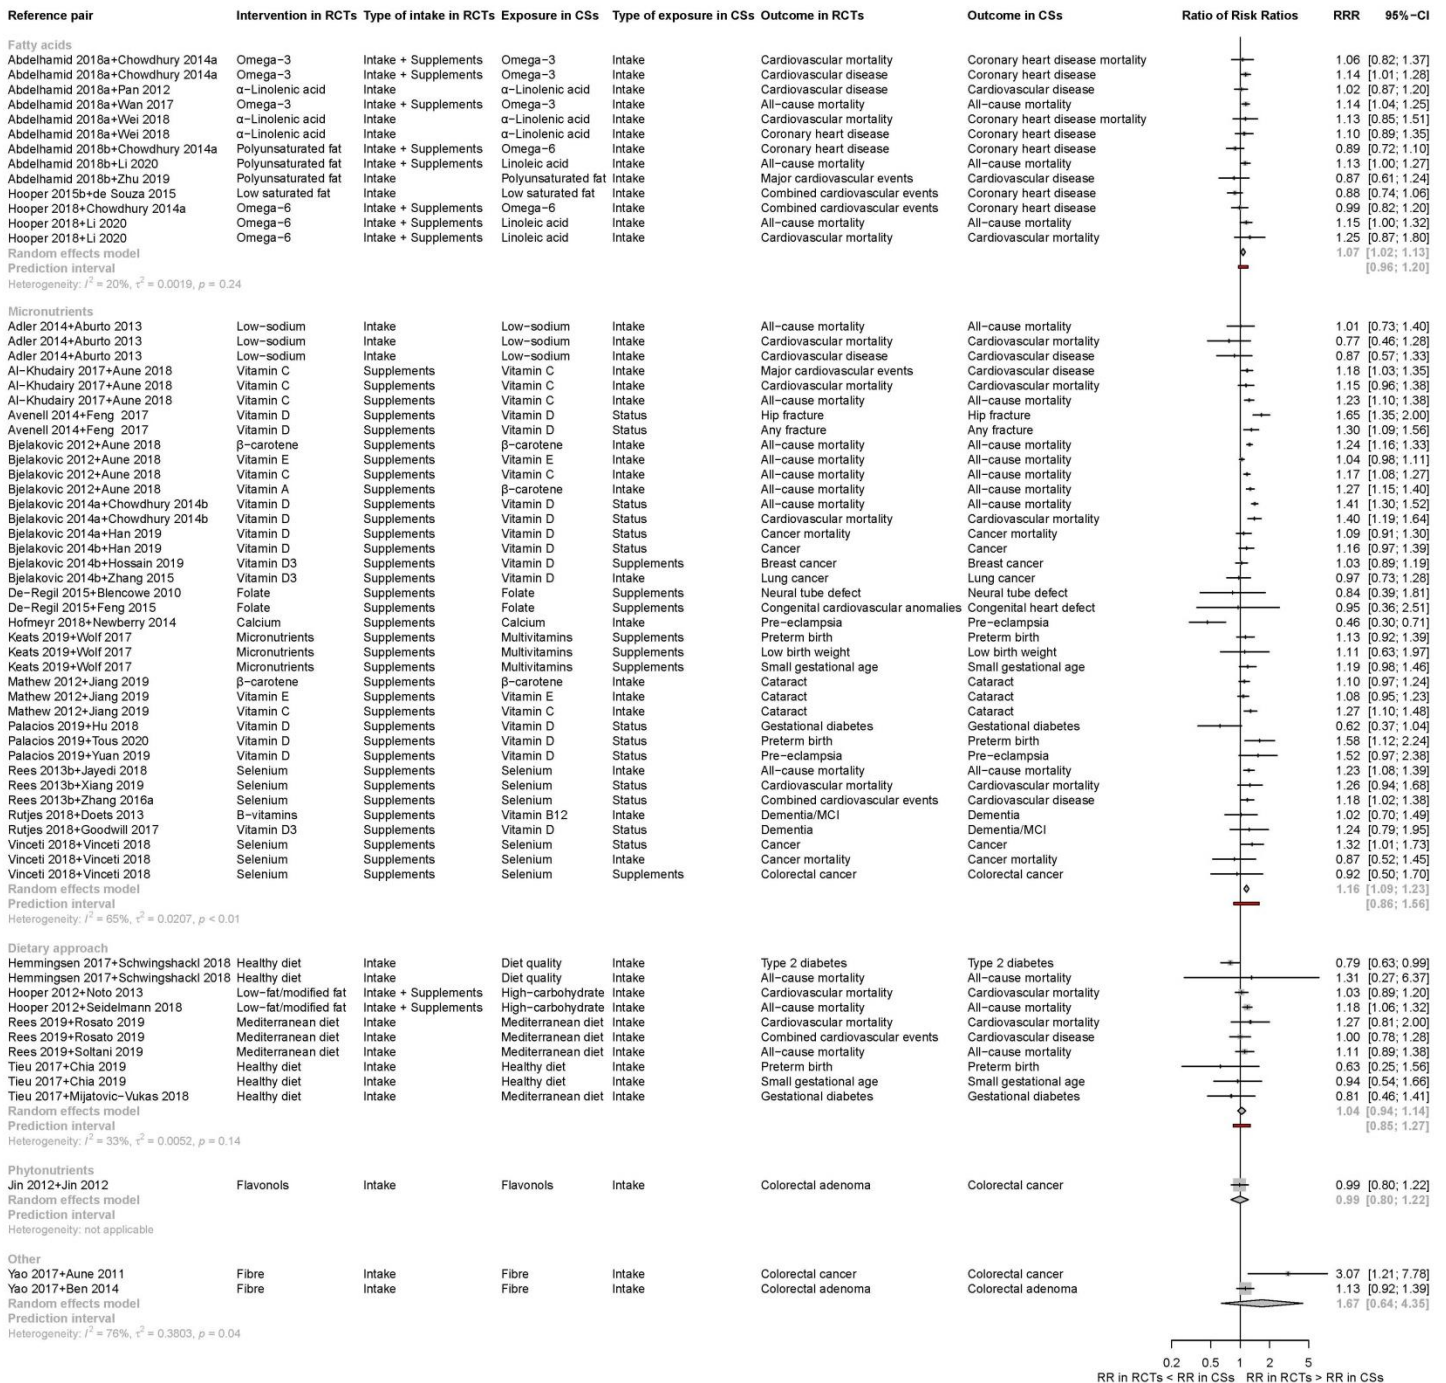

Supplementary Figure 20: Forest plot of comparisons between bodies of evidence from randomized controlled trials vs. cohort studies for dichotomous outcomes as pooled ratio of risk ratios (RRR) including only CSs with a RR <1 stratified by type of dietary intervention/exposure.

CS: cohort studies; RCTs: randomized controlled trials; RR: risk ratio; RRR: ratio of risk ratios;

## Supplementary data

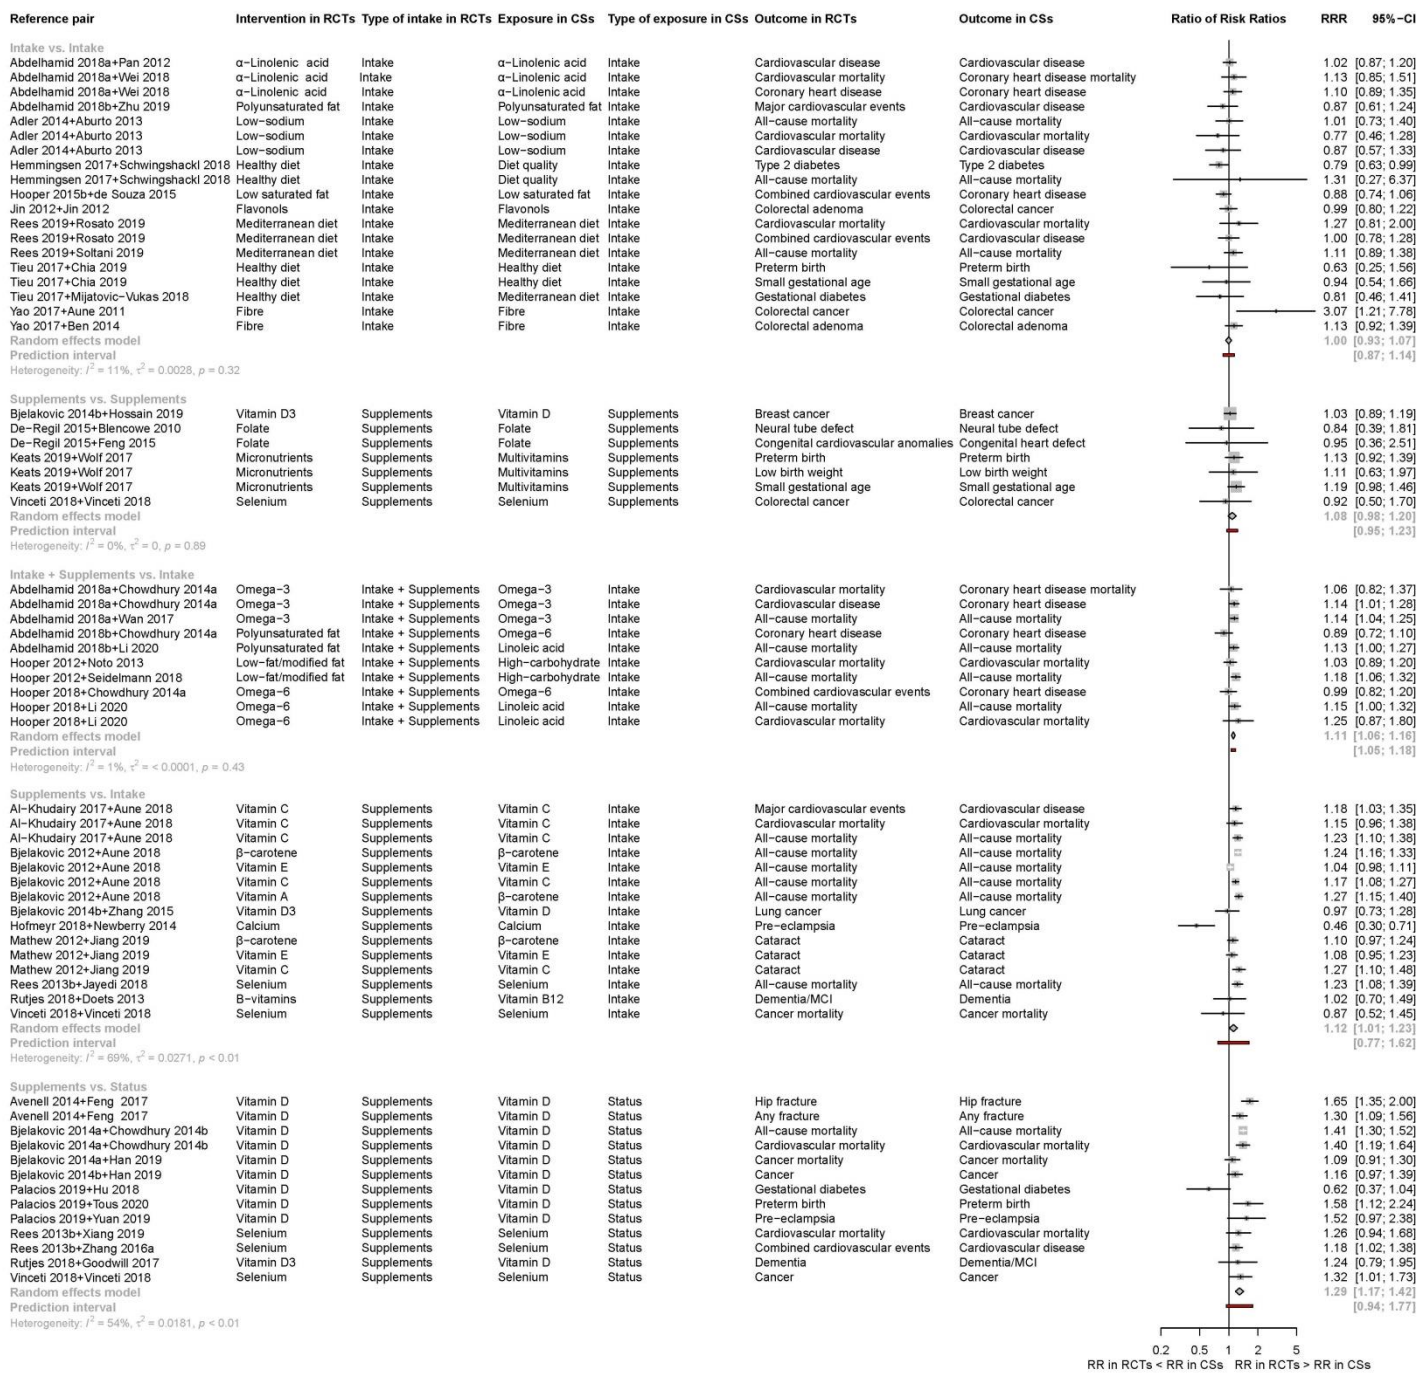

Supplementary Figure 21: Forest plot of comparisons between bodies of evidence from randomized controlled trials vs. cohort studies for dichotomous outcomes as pooled ratio of risk ratios (RRR) including only CSs with a RR <1 stratified by type of intake/exposure.

CS: cohort studies; RCTs: randomized controlled trials; RR: risk ratio; RRR: ratio of risk ratios;



# Supplementary data

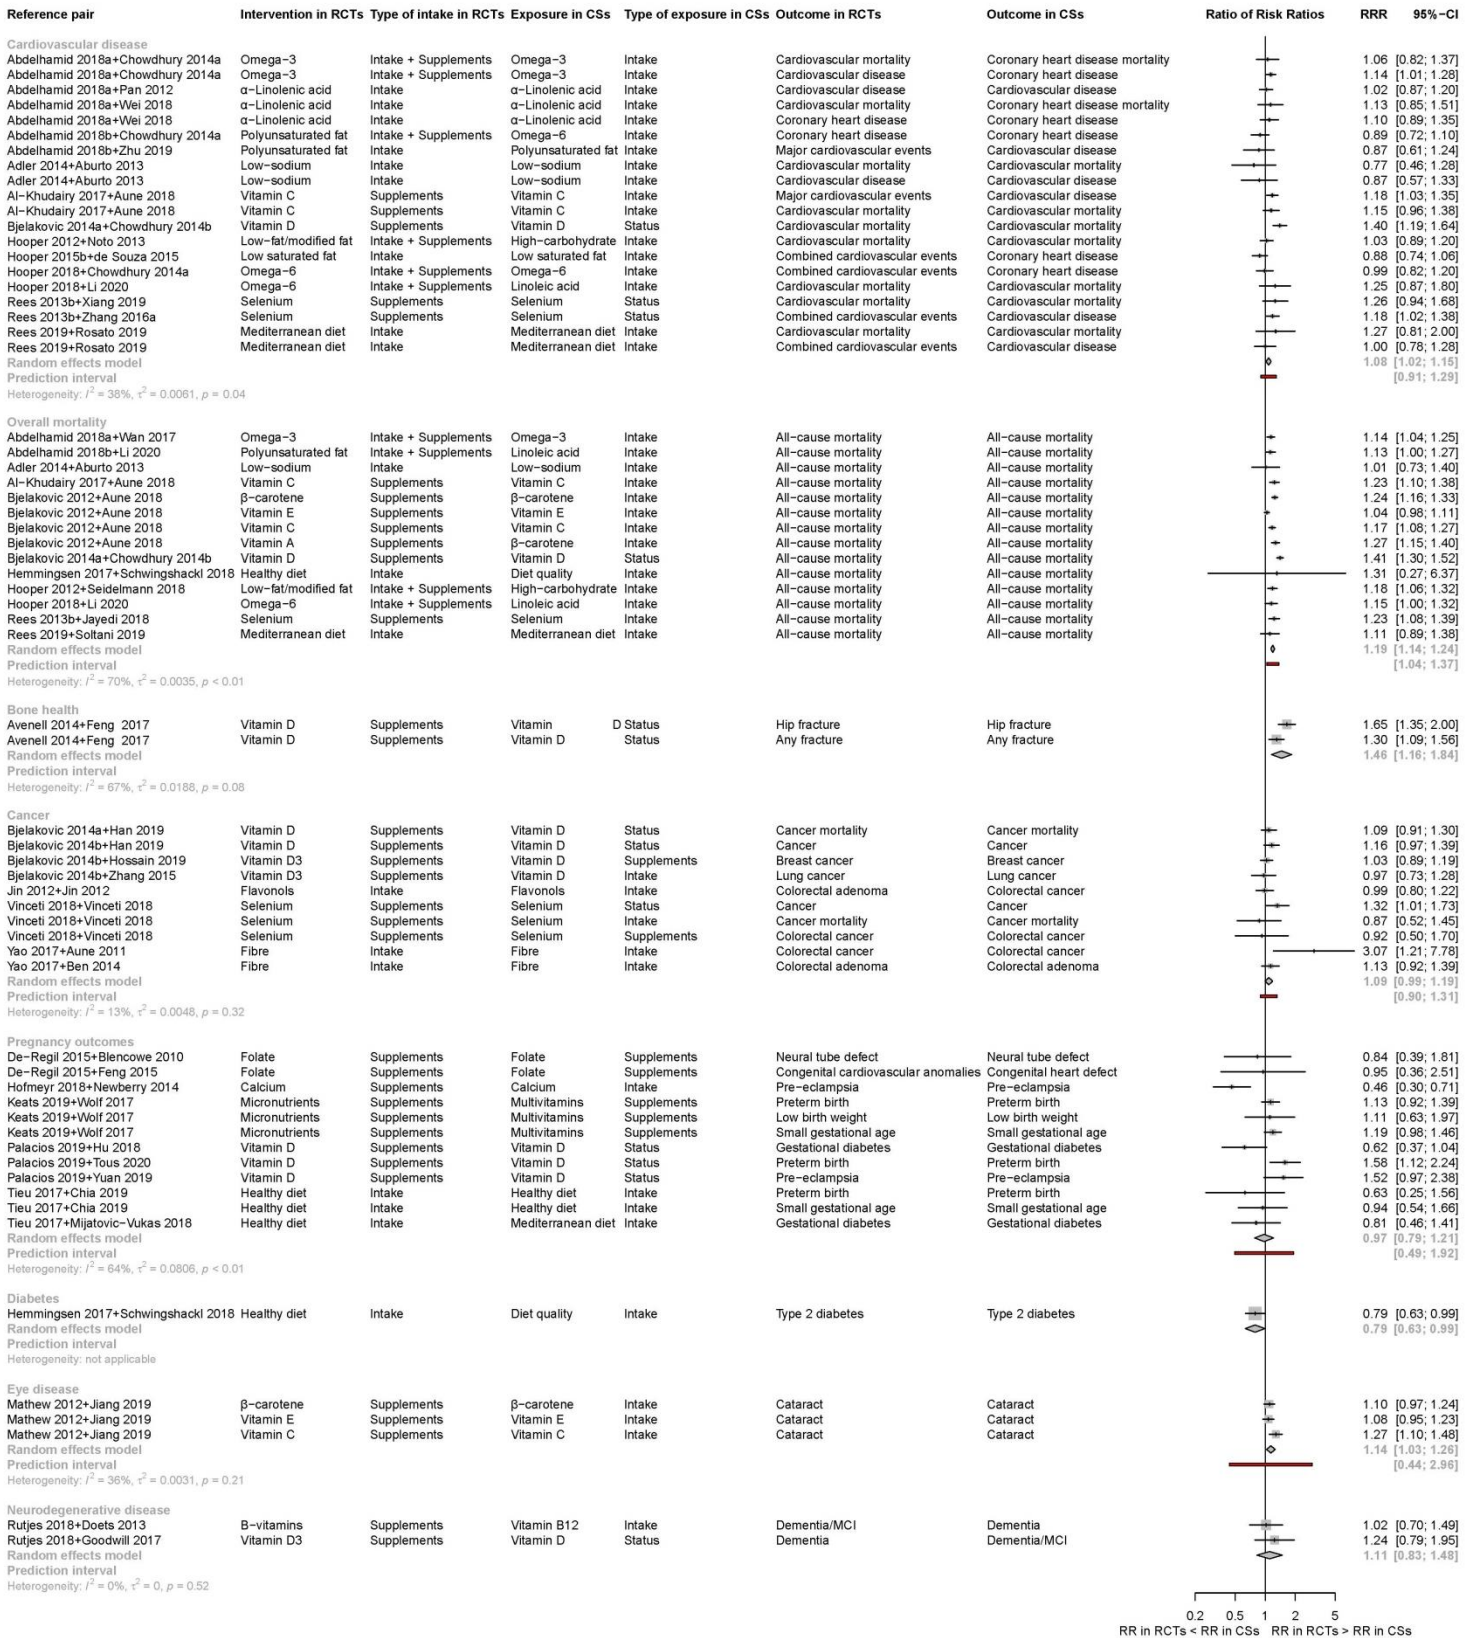

Supplementary Figure 22: Forest plot of comparisons between bodies of evidence from randomized controlled trials vs. cohort studies for dichotomous outcomes as pooled ratio of risk ratios (RRR) including only CSs with a RR <1 stratified by outcome.

CS: cohort studies; RCTs: randomized controlled trials; RR: risk ratio; RRR: ratio of risk ratios;

## Supplementary data

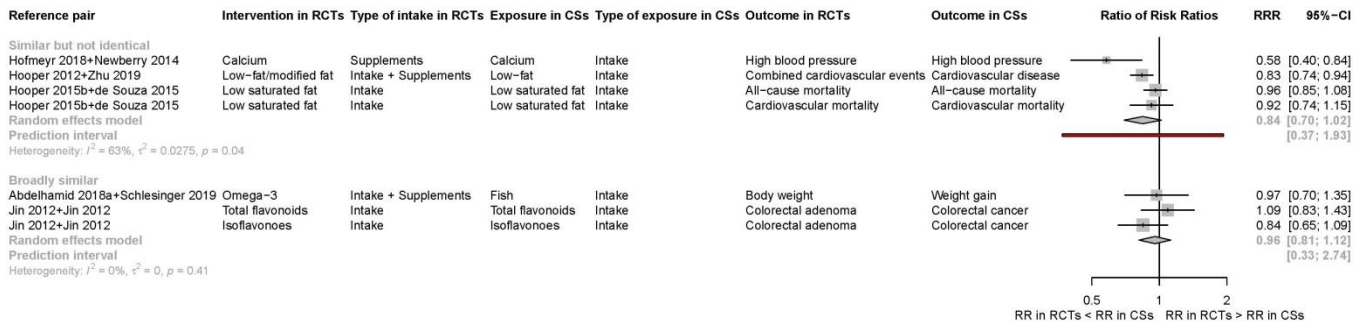

Supplementary Figure 23: Forest plot of comparisons between bodies of evidence from randomized controlled trials vs. cohort studies for dichotomous outcomes as pooled ratio of risk ratios (RRR) including only CSs with a  $RR \geq 1$  stratified by PI/ECO similarity degree.

CS: cohort studies; RCTs: randomized controlled trials; RR: risk ratio; RRR: ratio of risk ratios;

## Supplementary data

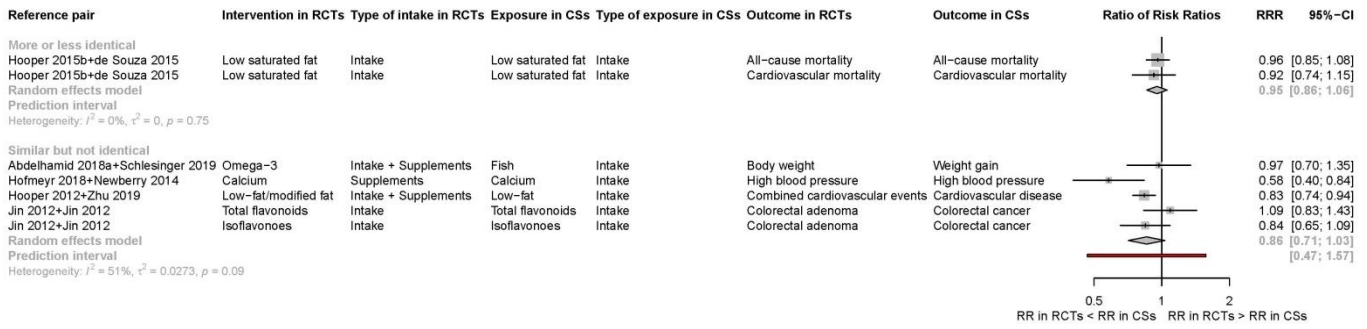

Supplementary Figure 24: Forest plot of comparisons between bodies of evidence from randomized controlled trials vs. cohort studies for dichotomous outcomes as pooled ratio of risk ratios (RRR) including only CSs with a  $RR \geq 1$  stratified by intervention/exposure similarity degree.

CS: cohort studies; RCTs: randomized controlled trials; RR: risk ratio; RRR: ratio of risk ratios;

## Supplementary data

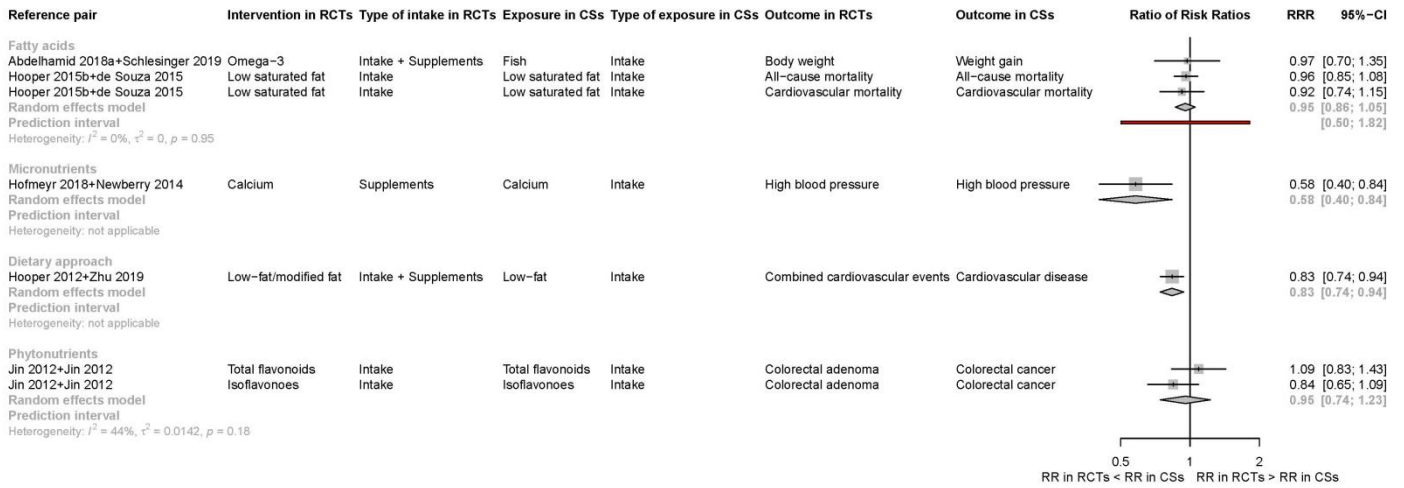

Supplementary Figure 25: Forest plot of comparisons between bodies of evidence from randomized controlled trials vs. cohort studies for dichotomous outcomes as pooled ratio of risk ratios (RRR) including only CSs with a  $RR \geq 1$  stratified by type of dietary intervention/exposure.

CS: cohort studies; RCTs: randomized controlled trials; RR: risk ratio; RRR: ratio of risk ratios;

## Supplementary data

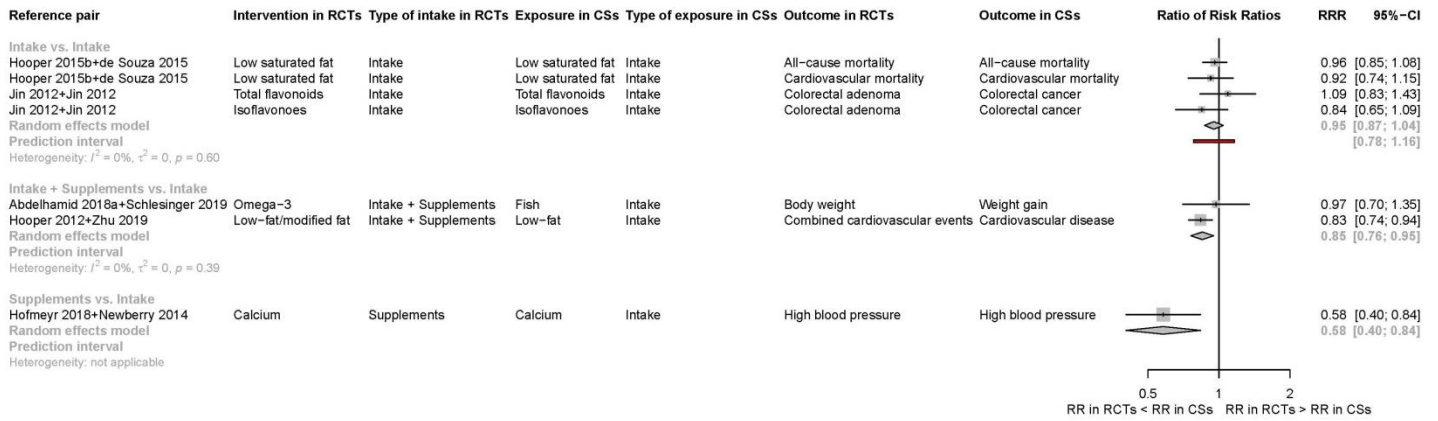

Supplementary Figure 26: Forest plot of comparisons between bodies of evidence from randomized controlled trials vs. cohort studies for dichotomous outcomes as pooled ratio of risk ratios (RRR) including only CSs with a  $RR \geq 1$  stratified by type of intake/exposure.

CS: cohort studies; RCTs: randomized controlled trials; RR: risk ratio; RRR: ratio of risk ratios;

## Supplementary data

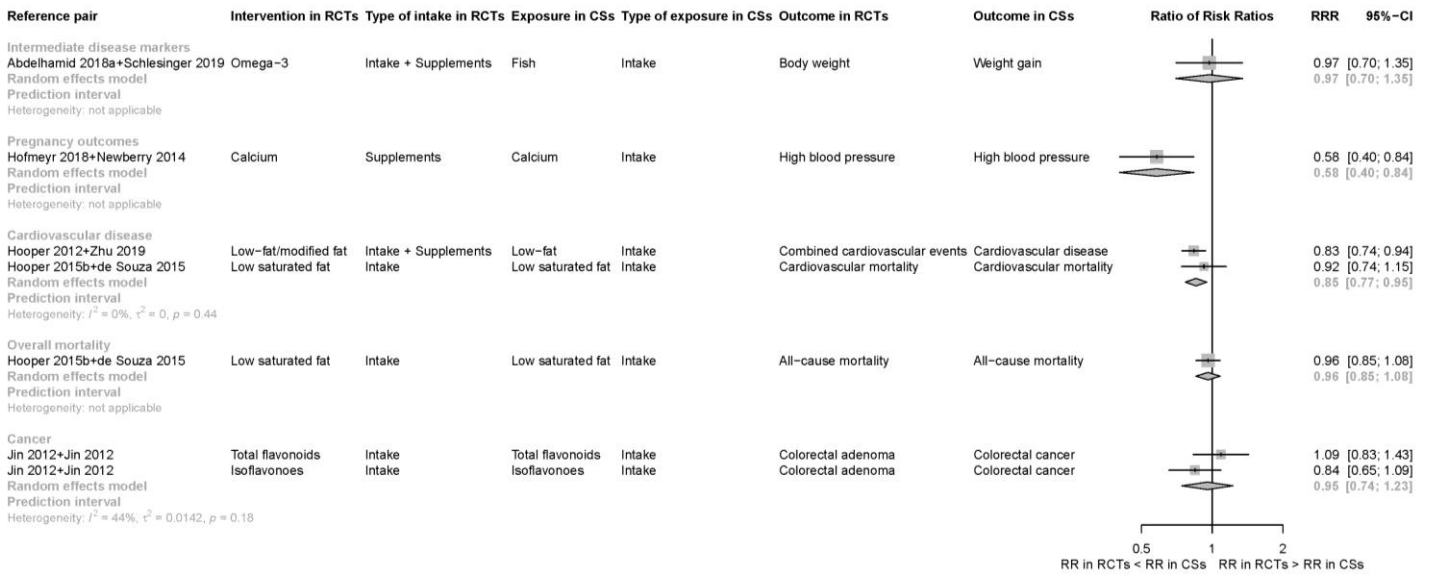

Supplementary Figure 27: Forest plot of comparisons between bodies of evidence from randomized controlled trials vs. cohort studies for dichotomous outcomes as pooled ratio of risk ratios (RRR) including only CSs with a RR  $\geq 1$  stratified by outcome.

CS: cohort studies; RCTs: randomized controlled trials; RR: risk ratio; RRR: ratio of risk ratios;

## Supplementary data

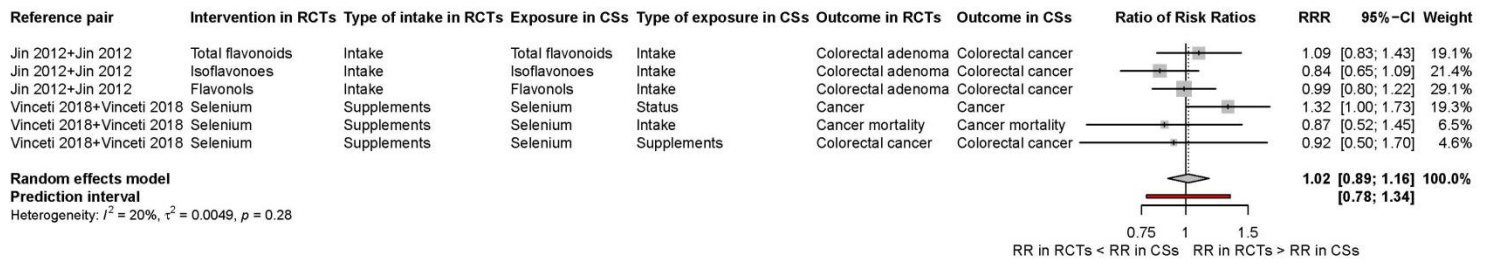

Supplementary Figure 28: Forest plot of comparisons: Sensitivity analysis (including only Cochrane Reviews) for bodies of evidence from randomized controlled trials vs. cohort studies for dichotomous outcomes as pooled ratio of risk ratios (RRR).

CS: cohort studies; RCTs: randomized controlled trials; RR: risk ratio; RRR: ratio of risk ratios;

## Supplementary References

1. Al-Khudairy L, Flowers N, Wheelhouse R, et al. Vitamin C supplementation for the primary prevention of cardiovascular disease. *Cochrane Database Syst Rev* 2017;3:CD011114. doi: 10.1002/14651858.CD011114.pub2 [published Online First: 2017/03/17]
2. Sesso HD, Buring JE, Christen WG, et al. Vitamins E and C in the prevention of cardiovascular disease in men: the Physicians' Health Study II randomized controlled trial. *JAMA* 2008;300(18):2123-33. doi: 10.1001/jama.2008.600 [published Online First: 2008/11/11]
3. Rees K, Takeda A, Martin N, et al. Mediterranean-style diet for the primary and secondary prevention of cardiovascular disease. *Cochrane Database Syst Rev* 2019;3:CD009825. doi: 10.1002/14651858.CD009825.pub3 [published Online First: 2019/03/14]
4. Estruch R, Ros E, Salas-Salvadó J, et al. Primary Prevention of Cardiovascular Disease with a Mediterranean Diet Supplemented with Extra-Virgin Olive Oil or Nuts. *New England Journal of Medicine* 2018;378(25):e34. doi: 10.1056/NEJMoa1800389
5. Hu L, Zhang Y, Wang X, et al. Maternal Vitamin D Status and Risk of Gestational Diabetes: a Meta-Analysis. *Cell Physiol Biochem* 2018;45(1):291-300. doi: 10.1159/000486810 [published Online First: 2018/02/07]
6. Palacios C, Trak-Fellermeier MA, Martinez RX, et al. Regimens of vitamin D supplementation for women during pregnancy. *Cochrane Database Syst Rev* 2019;10:CD013446. doi: 10.1002/14651858.Cd013446 [published Online First: 2019/10/04]
7. Tous M, Villalobos M, Iglesias L, et al. Vitamin D status during pregnancy and offspring outcomes: a systematic review and meta-analysis of observational studies. *Eur J Clin Nutr* 2020;74(1):36-53. doi: 10.1038/s41430-018-0373-x [published Online First: 2019/01/27]
8. Yuan Y, Tai W, Xu P, et al. Association of maternal serum 25-hydroxyvitamin D concentrations with risk of preeclampsia: a nested case-control study and meta-analysis. *J Matern Fetal Neonatal Med* 2019;1-10. doi: 10.1080/14767058.2019.1640675 [published Online First: 2019/07/10]
9. Goodwill AM, Szoeko C. A Systematic Review and Meta-Analysis of The Effect of Low Vitamin D on Cognition. *J Am Geriatr Soc* 2017;65(10):2161-68. doi: 10.1111/jgs.15012 [published Online First: 2017/08/02]
10. Rutjes AW, Denton DA, Di Nisio M, et al. Vitamin and mineral supplementation for maintaining cognitive function in cognitively healthy people in mid and late life. *Cochrane Database Syst Rev* 2018;12:CD011906. doi: 10.1002/14651858.CD011906.pub2 [published Online First: 2018/12/18]
11. Chia AR, Chen LW, Lai JS, et al. Maternal Dietary Patterns and Birth Outcomes: A Systematic Review and Meta-Analysis. *Adv Nutr* 2019;10(4):685-95. doi: 10.1093/advances/nmy123 [published Online First: 2019/05/02]



## Supplementary data

12. Tieu J, Shepherd E, Middleton P, et al. Dietary advice interventions in pregnancy for preventing gestational diabetes mellitus. *Cochrane Database Syst Rev* 2017;1:Cd006674. doi: 10.1002/14651858.CD006674.pub3 [published Online First: 2017/01/04]
13. Mijatovic-Vukas J, Capling L, Cheng S, et al. Associations of Diet and Physical Activity with Risk for Gestational Diabetes Mellitus: A Systematic Review and Meta-Analysis. *Nutrients* 2018;10(6) doi: 10.3390/nu10060698 [published Online First: 2018/06/01]
14. Vinceti M, Filippini T, Del Giovane C, et al. Selenium for preventing cancer. *Cochrane Database Syst Rev* 2018;1:Cd005195. doi: 10.1002/14651858.CD005195.pub4 [published Online First: 2018/01/30]
15. Abdelhamid AS, Brown TJ, Brainard JS, et al. Omega-3 fatty acids for the primary and secondary prevention of cardiovascular disease. *Cochrane Database Syst Rev* 2018a;11:Cd003177. doi: 10.1002/14651858.CD003177.pub4 [published Online First: 2018/12/07]
16. Schlesinger S, Neuenschwander M, Schwedhelm C, et al. Food Groups and Risk of Overweight, Obesity, and Weight Gain: A Systematic Review and Dose-Response Meta-Analysis of Prospective Studies. *Adv Nutr* 2019;10(2):205-18. doi: 10.1093/advances/nmy092 [published Online First: 2019/02/26]
17. Schulz M, Kroke A, Liese AD, et al. Food groups as predictors for short-term weight changes in men and women of the EPIC-Potsdam cohort. *J Nutr* 2002;132(6):1335-40. doi: 10.1093/jn/132.6.1335 [published Online First: 2002/06/04]
18. Chowdhury R, Warnakula S, Kunutsor S, et al. Association of dietary, circulating, and supplement fatty acids with coronary risk: a systematic review and meta-analysis. *Ann Intern Med* 2014a;160(6):398-406. doi: 10.7326/m13-1788 [published Online First: 2014/04/12]
19. Pan A, Chen M, Chowdhury R, et al. alpha-Linolenic acid and risk of cardiovascular disease: a systematic review and meta-analysis. *Am J Clin Nutr* 2012;96(6):1262-73. doi: 10.3945/ajcn.112.044040 [published Online First: 2012/10/19]
20. Wei J, Hou R, Xi Y, et al. The association and dose-response relationship between dietary intake of alpha-linolenic acid and risk of CHD: a systematic review and meta-analysis of cohort studies. *Br J Nutr* 2018;119(1):83-89. doi: 10.1017/s0007114517003294 [published Online First: 2018/01/23]
21. Abdelhamid AS, Martin N, Bridges C, et al. Polyunsaturated fatty acids for the primary and secondary prevention of cardiovascular disease. *Cochrane Database Syst Rev* 2018b;11:Cd012345. doi: 10.1002/14651858.CD012345.pub3 [published Online First: 2018/11/30]
22. Zhu Y, Bo Y, Liu Y. Dietary total fat, fatty acids intake, and risk of cardiovascular disease: a dose-response meta-analysis of cohort studies. *Lipids Health Dis* 2019;18(1):91. doi: 10.1186/s12944-019-1035-2 [published Online First: 2019/04/08]
23. Adler AJ, Taylor F, Martin N, et al. Reduced dietary salt for the prevention of cardiovascular disease. *Cochrane Database Syst Rev* 2014(12):Cd009217. doi: 10.1002/14651858.CD009217.pub3 [published Online First: 2014/12/19]

## Supplementary data

24. Aburto NJ, Ziolkovska A, Hooper L, et al. Effect of lower sodium intake on health: systematic review and meta-analyses. *Bmj* 2013;346:f1326. doi: 10.1136/bmj.f1326 [published Online First: 2013/04/06]
25. Leyvraz M, Chatelan A, da Costa BR, et al. Sodium intake and blood pressure in children and adolescents: a systematic review and meta-analysis of experimental and observational studies. *Int J Epidemiol* 2018;47(6):1796-810. doi: 10.1093/ije/dyy121 [published Online First: 2018/06/30]
26. Aune D, Keum N, Giovannucci E, et al. Dietary intake and blood concentrations of antioxidants and the risk of cardiovascular disease, total cancer, and all-cause mortality: a systematic review and dose-response meta-analysis of prospective studies. *Am J Clin Nutr* 2018;108(5):1069-91. doi: 10.1093/ajcn/nqy097 [published Online First: 2018/11/27]
27. Avenell A, Mak JC, O'Connell D. Vitamin D and vitamin D analogues for preventing fractures in post-menopausal women and older men. *Cochrane Database Syst Rev* 2014(4):Cd000227. doi: 10.1002/14651858.CD000227.pub4 [published Online First: 2014/04/15]
28. Feng Y, Cheng G, Wang H, et al. The associations between serum 25-hydroxyvitamin D level and the risk of total fracture and hip fracture. *Osteoporos Int* 2017;28(5):1641-52. doi: 10.1007/s00198-017-3955-x [published Online First: 2017/02/22]
29. Bjelakovic G, Gluud LL, Nikolova D, et al. Vitamin D supplementation for prevention of cancer in adults. *Cochrane Database Syst Rev* 2014b(6):Cd007469. doi: 10.1002/14651858.CD007469.pub2 [published Online First: 2014/06/24]
30. Hossain S, Beydoun MA, Beydoun HA, et al. Vitamin D and breast cancer: A systematic review and meta-analysis of observational studies. *Clin Nutr ESPEN* 2019;30:170-84. doi: 10.1016/j.clnesp.2018.12.085 [published Online First: 2019/03/25]
31. Zhang L, Wang S, Che X, et al. Vitamin D and lung cancer risk: a comprehensive review and meta-analysis. *Cell Physiol Biochem* 2015;36(1):299-305. doi: 10.1159/000374072 [published Online First: 2015/05/15]
32. Hofmeyr GJ, Lawrie TA, Atallah AN, et al. Calcium supplementation during pregnancy for preventing hypertensive disorders and related problems. *Cochrane Database Syst Rev* 2018;10:Cd001059. doi: 10.1002/14651858.CD001059.pub5 [published Online First: 2018/10/03]
33. Newberry SJ, Chung M, Shekelle PG, et al. Vitamin D and Calcium: A Systematic Review of Health Outcomes (Update). *Evid Rep Technol Assess (Full Rep)* 2014(217):1-929. doi: 10.23970/ahrqepcerta217 [published Online First: 2014/09/01]
34. Hooper L, Summerbell CD, Thompson R, et al. Reduced or modified dietary fat for preventing cardiovascular disease. *Cochrane Database Syst Rev* 2012(5):Cd002137. doi: 10.1002/14651858.CD002137.pub3 [published Online First: 2012/05/18]
35. Hooper L, Martin N, Abdelhamid A, et al. Reduction in saturated fat intake for cardiovascular disease. *Cochrane Database Syst Rev* 2015b(6):Cd011737. doi: 10.1002/14651858.Cd011737 [published Online First: 2015/06/13]

## Supplementary data

36. de Souza RJ, Mente A, Maroleanu A, et al. Intake of saturated and trans unsaturated fatty acids and risk of all cause mortality, cardiovascular disease, and type 2 diabetes: systematic review and meta-analysis of observational studies. *Bmj* 2015;351:h3978. doi: 10.1136/bmj.h3978 [published Online First: 2015/08/14]
37. Hooper L, Al-Khudairy L, Abdelhamid AS, et al. Omega-6 fats for the primary and secondary prevention of cardiovascular disease. *Cochrane Database Syst Rev* 2018;11:CD011094. doi: 10.1002/14651858.CD011094.pub4 [published Online First: 2018/11/30]
38. Keats EC, Haider BA, Tam E, et al. Multiple-micronutrient supplementation for women during pregnancy. *Cochrane Database Syst Rev* 2019;3:CD004905. doi: 10.1002/14651858.CD004905.pub6 [published Online First: 2019/03/16]
39. Wolf HT, Hegaard HK, Huusom LD, et al. Multivitamin use and adverse birth outcomes in high-income countries: a systematic review and meta-analysis. *Am J Obstet Gynecol* 2017;217(4):404.e1-04.e30. doi: 10.1016/j.ajog.2017.03.029 [published Online First: 2017/04/06]
40. Rees K, Dyakova M, Wilson N, et al. Dietary advice for reducing cardiovascular risk. *Cochrane Database Syst Rev* 2013a(12):Cd002128. doi: 10.1002/14651858.CD002128.pub5 [published Online First: 2013/12/10]
41. Kastorini CM, Milionis HJ, Esposito K, et al. The effect of Mediterranean diet on metabolic syndrome and its components: a meta-analysis of 50 studies and 534,906 individuals. *J Am Coll Cardiol* 2011;57(11):1299-313. doi: 10.1016/j.jacc.2010.09.073 [published Online First: 2011/03/12]
42. Rees K, Hartley L, Day C, et al. Selenium supplementation for the primary prevention of cardiovascular disease. *Cochrane Database Syst Rev* 2013b(1):Cd009671. doi: 10.1002/14651858.CD009671.pub2 [published Online First: 2013/02/27]
43. Zhang X, Liu C, Guo J, et al. Selenium status and cardiovascular diseases: meta-analysis of prospective observational studies and randomized controlled trials. *Eur J Clin Nutr* 2016a;70(2):162-9. doi: 10.1038/ejcn.2015.78 [published Online First: 2015/05/21]
44. Rosato V, Temple NJ, La Vecchia C, et al. Mediterranean diet and cardiovascular disease: a systematic review and meta-analysis of observational studies. *Eur J Nutr* 2019;58(1):173-91. doi: 10.1007/s00394-017-1582-0 [published Online First: 2017/11/28]
45. Yao Y, Suo T, Andersson R, et al. Dietary fibre for the prevention of recurrent colorectal adenomas and carcinomas. *Cochrane Database Syst Rev* 2017;1:CD003430. doi: 10.1002/14651858.CD003430.pub2 [published Online First: 2017/01/09]
46. Ben Q, Sun Y, Chai R, et al. Dietary fiber intake reduces risk for colorectal adenoma: a meta-analysis. *Gastroenterology* 2014;146(3):689-99.e6. doi: 10.1053/j.gastro.2013.11.003 [published Online First: 2013/11/13]
47. Martí-Carvajal AJ, Solà I, Lathyris D, et al. Homocysteine-lowering interventions for preventing cardiovascular events. *Cochrane Database of Systematic Reviews* 2017(8) doi: 10.1002/14651858.CD006612.pub5

## Supplementary data

48. Balogun OO, da Silva Lopes K, Ota E, et al. Vitamin supplementation for preventing miscarriage. *Cochrane Database Syst Rev* 2016;2016(5):Cd004073. doi: 10.1002/14651858.CD004073.pub4 [published Online First: 2016/05/07]
49. Buppasiri P, Lumbiganon P, Thinkhamrop J, et al. Calcium supplementation (other than for preventing or treating hypertension) for improving pregnancy and infant outcomes. *Cochrane Database Syst Rev* 2015(2):Cd007079. doi: 10.1002/14651858.CD007079.pub3 [published Online First: 2015/04/30]
50. Harding KB, Peña-Rosas JP, Webster AC, et al. Iodine supplementation for women during the preconception, pregnancy and postpartum period. *Cochrane Database Syst Rev* 2017;3(3):Cd011761. doi: 10.1002/14651858.CD011761.pub2 [published Online First: 2017/03/06]
51. Hemilä H, Louhiala P. Vitamin C for preventing and treating pneumonia. *Cochrane Database Syst Rev* 2013(8):Cd005532. doi: 10.1002/14651858.CD005532.pub3 [published Online First: 2013/08/09]
52. Imdad A, Mayo-Wilson E, Herzer K, et al. Vitamin A supplementation for preventing morbidity and mortality in children from six months to five years of age. *Cochrane Database Syst Rev* 2017;3(3):Cd008524. doi: 10.1002/14651858.CD008524.pub3 [published Online First: 2017/03/11]
53. Imdad A, Ahmed Z, Bhutta ZA. Vitamin A supplementation for the prevention of morbidity and mortality in infants one to six months of age. *Cochrane Database Syst Rev* 2016;9(9):Cd007480. doi: 10.1002/14651858.CD007480.pub3 [published Online First: 2016/09/30]
54. Lassi ZS, Moin A, Bhutta ZA. Zinc supplementation for the prevention of pneumonia in children aged 2 months to 59 months. *Cochrane Database Syst Rev* 2016;12(12):Cd005978. doi: 10.1002/14651858.CD005978.pub3 [published Online First: 2016/12/05]
55. Mayo-Wilson E, Junior JA, Imdad A, et al. Zinc supplementation for preventing mortality, morbidity, and growth failure in children aged 6 months to 12 years of age. *Cochrane Database Syst Rev* 2014(5):Cd009384. doi: 10.1002/14651858.CD009384.pub2 [published Online First: 2014/05/16]
56. Oliveira JM, Allert R, East CE. Vitamin A supplementation for postpartum women. *Cochrane Database Syst Rev* 2016;3:Cd005944. doi: 10.1002/14651858.CD005944.pub3 [published Online First: 2016/03/26]
57. Salam RA, Zuberi NF, Bhutta ZA. Pyridoxine (vitamin B6) supplementation during pregnancy or labour for maternal and neonatal outcomes. *Cochrane Database Syst Rev* 2015(6):Cd000179. doi: 10.1002/14651858.CD000179.pub3 [published Online First: 2015/06/04]
58. Schwenger EM, Tejani AM, Loewen PS. Probiotics for preventing urinary tract infections in adults and children. *Cochrane Database Syst Rev* 2015(12):Cd008772. doi: 10.1002/14651858.CD008772.pub2 [published Online First: 2015/12/24]
59. Suchdev PS, Peña-Rosas JP, De-Regil LM. Multiple micronutrient powders for home (point-of-use) fortification of foods in pregnant women. *Cochrane Database Syst Rev*

## Supplementary data

- 2015(6):Cd011158. doi: 10.1002/14651858.CD011158.pub2 [published Online First: 2015/06/21]
60. Evans JR, Lawrenson JG. Antioxidant vitamin and mineral supplements for slowing the progression of age-related macular degeneration. *Cochrane Database of Systematic Reviews* 2017(7) doi: 10.1002/14651858.CD000254.pub4
61. Barrett HL, Dekker Nitert M, Conwell LS, et al. Probiotics for preventing gestational diabetes. *Cochrane Database Syst Rev* 2014;2014(2):Cd009951. doi: 10.1002/14651858.CD009951.pub2 [published Online First: 2014/02/28]
62. Chen N, Yang M, Zhou M, et al. L-carnitine for cognitive enhancement in people without cognitive impairment. *Cochrane Database Syst Rev* 2017;3(3):Cd009374. doi: 10.1002/14651858.CD009374.pub3 [published Online First: 2017/03/30]
63. Crawford TJ, Crowther CA, Alsweiler J, et al. Antenatal dietary supplementation with myo-inositol in women during pregnancy for preventing gestational diabetes. *Cochrane Database Syst Rev* 2015;2015(12):Cd011507. doi: 10.1002/14651858.CD011507.pub2 [published Online First: 2015/12/19]
64. Evans JR, Lawrenson JG. Antioxidant vitamin and mineral supplements for preventing age-related macular degeneration. *Cochrane Database Syst Rev* 2017;7(7):Cd000253. doi: 10.1002/14651858.CD000253.pub4 [published Online First: 2017/08/02]
65. Graudal NA, Hubeck-Graudal T, Jurgens G. Effects of low sodium diet versus high sodium diet on blood pressure, renin, aldosterone, catecholamines, cholesterol, and triglyceride. *Cochrane Database Syst Rev* 2017;4(4):Cd004022. doi: 10.1002/14651858.CD004022.pub4 [published Online First: 2017/04/10]
66. Hartley L, Clar C, Ghannam O, et al. Vitamin K for the primary prevention of cardiovascular disease. *Cochrane Database Syst Rev* 2015(9):Cd011148. doi: 10.1002/14651858.CD011148.pub2 [published Online First: 2015/09/22]
67. He FJ, Li J, Macgregor GA. Effect of longer-term modest salt reduction on blood pressure. *Cochrane Database Syst Rev* 2013(4):Cd004937. doi: 10.1002/14651858.CD004937.pub2 [published Online First: 2013/05/02]
68. Lawrenson JG, Evans JR. Omega 3 fatty acids for preventing or slowing the progression of age-related macular degeneration. *Cochrane Database Syst Rev* 2015;2015(4):Cd010015. doi: 10.1002/14651858.CD010015.pub3 [published Online First: 2015/04/10]
69. Low MS, Speedy J, Styles CE, et al. Daily iron supplementation for improving anaemia, iron status and health in menstruating women. *Cochrane Database Syst Rev* 2016;4:Cd009747. doi: 10.1002/14651858.CD009747.pub2 [published Online First: 2016/04/19]
70. Makrides M, Crosby DD, Bain E, et al. Magnesium supplementation in pregnancy. *Cochrane Database Syst Rev* 2014;2014(4):Cd000937. doi: 10.1002/14651858.CD000937.pub2 [published Online First: 2014/04/04]

## Supplementary data

71. Martin N, Germanò R, Hartley L, et al. Nut consumption for the primary prevention of cardiovascular disease. *Cochrane Database Syst Rev* 2015(9):Cd011583. doi: 10.1002/14651858.CD011583.pub2 [published Online First: 2015/09/29]
72. Middleton P, Gomersall JC, Gould JF, et al. Omega-3 fatty acid addition during pregnancy. *Cochrane Database Syst Rev* 2018;11(11):Cd003402. doi: 10.1002/14651858.CD003402.pub3 [published Online First: 2018/11/28]
73. Ota E, Mori R, Middleton P, et al. Zinc supplementation for improving pregnancy and infant outcome. *Cochrane Database Syst Rev* 2015;2015(2):Cd000230. doi: 10.1002/14651858.CD000230.pub5 [published Online First: 2015/05/01]
74. Peña-Rosas JP, De-Regil LM, Garcia-Casal MN, et al. Daily oral iron supplementation during pregnancy. *Cochrane Database Syst Rev* 2015(7):Cd004736. doi: 10.1002/14651858.CD004736.pub5 [published Online First: 2015/07/23]
75. Ried K, Sullivan TR, Fakler P, et al. Effect of cocoa on blood pressure. *Cochrane Database Syst Rev* 2012(8):Cd008893. doi: 10.1002/14651858.CD008893.pub2 [published Online First: 2012/08/17]
76. Rumbold A, Ota E, Nagata C, et al. Vitamin C supplementation in pregnancy. *Cochrane Database Syst Rev* 2015(9):Cd004072. doi: 10.1002/14651858.CD004072.pub3 [published Online First: 2015/09/30]
77. Shepherd E, Gomersall JC, Tieu J, et al. Combined diet and exercise interventions for preventing gestational diabetes mellitus. *Cochrane Database Syst Rev* 2017;11(11):Cd010443. doi: 10.1002/14651858.CD010443.pub3 [published Online First: 2017/11/13]
78. Muktabhant B, Lawrie TA, Lumbiganon P, et al. Diet or exercise, or both, for preventing excessive weight gain in pregnancy. *Cochrane Database Syst Rev* 2015(6):Cd007145. doi: 10.1002/14651858.CD007145.pub3 [published Online First: 2015/06/13]
79. Novaković R, Geelen A, Ristić-Medić D, et al. Systematic Review of Observational Studies with Dose-Response Meta-Analysis between Folate Intake and Status Biomarkers in Adults and the Elderly. *Ann Nutr Metab* 2018;73(1):30-43. doi: 10.1159/000490003 [published Online First: 2018/06/08]
80. Pranger IG, Joustra ML, Corpeleijn E, et al. Fatty acids as biomarkers of total dairy and dairy fat intakes: a systematic review and meta-analysis. *Nutr Rev* 2019;77(1):46-63. doi: 10.1093/nutrit/nuy048 [published Online First: 2018/10/12]
81. Lin J, Zhang F, Lei Y. Dietary intake and urinary level of cadmium and breast cancer risk: A meta-analysis. *Cancer Epidemiol* 2016;42:101-7. doi: 10.1016/j.canep.2016.04.002 [published Online First: 2016/04/18]
82. Zgaga L, O'Sullivan F, Cantwell MM, et al. Markers of Vitamin D Exposure and Esophageal Cancer Risk: A Systematic Review and Meta-analysis. *Cancer Epidemiol Biomarkers Prev* 2016;25(6):877-86. doi: 10.1158/1055-9965.Epi-15-1162 [published Online First: 2016/04/01]

## Supplementary data

83. Zhou Y, Wang T, Zhai S, et al. Linoleic acid and breast cancer risk: a meta-analysis. *Public Health Nutr* 2016;19(8):1457-63. doi: 10.1017/s136898001500289x [published Online First: 2015/10/06]
84. Chuang SC, Rota M, Gunter MJ, et al. Quantifying the dose-response relationship between circulating folate concentrations and colorectal cancer in cohort studies: a meta-analysis based on a flexible meta-regression model. *Am J Epidemiol* 2013;178(7):1028-37. doi: 10.1093/aje/kwt083 [published Online First: 2013/07/19]
85. Farvid MS, Ding M, Pan A, et al. Dietary linoleic acid and risk of coronary heart disease: a systematic review and meta-analysis of prospective cohort studies. *Circulation* 2014;130(18):1568-78. doi: 10.1161/circulationaha.114.010236 [published Online First: 2014/08/28]
86. Hong Z, Tian C, Zhang X. Dietary calcium intake, vitamin D levels, and breast cancer risk: a dose-response analysis of observational studies. *Breast Cancer Res Treat* 2012;136(1):309-12. doi: 10.1007/s10549-012-2172-8 [published Online First: 2012/08/09]
87. Jayedi A, Rashidy-Pour A, Parohan M, et al. Dietary and circulating vitamin C, vitamin E,  $\beta$ -carotene and risk of total cardiovascular mortality: a systematic review and dose-response meta-analysis of prospective observational studies. *Public Health Nutr* 2019;22(10):1872-87. doi: 10.1017/s1368980018003725 [published Online First: 2019/01/12]
88. Kim Y, Je Y. Vitamin D intake, blood 25(OH)D levels, and breast cancer risk or mortality: a meta-analysis. *Br J Cancer* 2014;110(11):2772-84. doi: 10.1038/bjc.2014.175 [published Online First: 2014/04/10]
89. Perez-Cornago A, Appleby PN, Boeing H, et al. Circulating isoflavone and lignan concentrations and prostate cancer risk: a meta-analysis of individual participant data from seven prospective studies including 2,828 cases and 5,593 controls. *Int J Cancer* 2018;143(11):2677-86. doi: 10.1002/ijc.31640 [published Online First: 2018/07/05]
90. Ben S, Du M, Ma G, et al. Vitamin B(2) intake reduces the risk for colorectal cancer: a dose-response analysis. *Eur J Nutr* 2019;58(4):1591-602. doi: 10.1007/s00394-018-1702-5 [published Online First: 2018/05/11]
91. Berger S, Raman G, Vishwanathan R, et al. Dietary cholesterol and cardiovascular disease: a systematic review and meta-analysis. *Am J Clin Nutr* 2015;102(2):276-94. doi: 10.3945/ajcn.114.100305 [published Online First: 2015/06/26]
92. Cao H, Wang C, Chai R, et al. Iron intake, serum iron indices and risk of colorectal adenomas: a meta-analysis of observational studies. *Eur J Cancer Care (Engl)* 2017;26(5) doi: 10.1111/ecc.12486 [published Online First: 2016/03/10]
93. Chang VC, Cotterchio M, Khoo E. Iron intake, body iron status, and risk of breast cancer: a systematic review and meta-analysis. *BMC Cancer* 2019;19(1):543. doi: 10.1186/s12885-019-5642-0 [published Online First: 2019/06/07]
94. Chen X, Zhou T, Chen M. Meta analysis of the association of cholesterol with pancreatic carcinoma risk. *J buon* 2015;20(1):109-13. [published Online First: 2015/03/18]

## Supplementary data

95. Chen P, Zhang W, Wang X, et al. Lycopene and Risk of Prostate Cancer: A Systematic Review and Meta-Analysis. *Medicine (Baltimore)* 2015;94(33):e1260. doi: 10.1097/md.0000000000001260 [published Online First: 2015/08/20]
96. Chen HG, Sheng LT, Zhang YB, et al. Association of vitamin K with cardiovascular events and all-cause mortality: a systematic review and meta-analysis. *Eur J Nutr* 2019;58(6):2191-205. doi: 10.1007/s00394-019-01998-3 [published Online First: 2019/05/24]
97. Cheng HM, Koutsidis G, Lodge JK, et al. Lycopene and tomato and risk of cardiovascular diseases: A systematic review and meta-analysis of epidemiological evidence. *Crit Rev Food Sci Nutr* 2019;59(1):141-58. doi: 10.1080/10408398.2017.1362630 [published Online First: 2017/08/12]
98. Del Gobbo LC, Imamura F, Wu JH, et al. Circulating and dietary magnesium and risk of cardiovascular disease: a systematic review and meta-analysis of prospective studies. *Am J Clin Nutr* 2013;98(1):160-73. doi: 10.3945/ajcn.112.053132 [published Online First: 2013/05/31]
99. Fonseca-Nunes A, Jakszyn P, Agudo A. Iron and cancer risk--a systematic review and meta-analysis of the epidemiological evidence. *Cancer Epidemiol Biomarkers Prev* 2014;23(1):12-31. doi: 10.1158/1055-9965.Epi-13-0733 [published Online First: 2013/11/19]
100. Han H, Fang X, Wei X, et al. Dose-response relationship between dietary magnesium intake, serum magnesium concentration and risk of hypertension: a systematic review and meta-analysis of prospective cohort studies. *Nutr J* 2017;16(1):26. doi: 10.1186/s12937-017-0247-4 [published Online First: 2017/05/10]
101. Kunutsor SK, Apekey TA, Steur M. Vitamin D and risk of future hypertension: meta-analysis of 283,537 participants. *Eur J Epidemiol* 2013;28(3):205-21. doi: 10.1007/s10654-013-9790-2 [published Online First: 2013/03/05]
102. Leermakers ET, Darweesh SK, Baena CP, et al. The effects of lutein on cardiometabolic health across the life course: a systematic review and meta-analysis. *Am J Clin Nutr* 2016;103(2):481-94. doi: 10.3945/ajcn.115.120931 [published Online First: 2016/01/15]
103. Mocellin S, Briarava M, Pilati P. Vitamin B6 and Cancer Risk: A Field Synopsis and Meta-Analysis. *J Natl Cancer Inst* 2017;109(3):1-9. doi: 10.1093/jnci/djw230 [published Online First: 2017/04/05]
104. Kolahdouz Mohammadi R, Bagheri M, Kolahdouz Mohammadi M, et al. Ruminant trans-fatty acids and risk of breast cancer: a systematic review and meta-analysis of observational studies. *Minerva Endocrinol* 2017;42(4):385-96. doi: 10.23736/s0391-1977.16.02514-1 [published Online First: 2016/09/15]
105. Park HY, Hong YC, Lee K, et al. Vitamin D status and risk of non-Hodgkin lymphoma: An updated meta-analysis. *PLoS One* 2019;14(4):e0216284. doi: 10.1371/journal.pone.0216284 [published Online First: 2019/04/30]
106. Qu X, Jin F, Hao Y, et al. Magnesium and the risk of cardiovascular events: a meta-analysis of prospective cohort studies. *PLoS One* 2013;8(3):e57720. doi: 10.1371/journal.pone.0057720 [published Online First: 2013/03/23]



## Supplementary data

107. Rienks J, Barbaresko J, Oluwagbemigun K, et al. Polyphenol exposure and risk of type 2 diabetes: dose-response meta-analyses and systematic review of prospective cohort studies. *Am J Clin Nutr* 2018;108(1):49-61. doi: 10.1093/ajcn/nqy083 [published Online First: 2018/06/23]
108. Soltani S, Kolahehdouz Mohammadi R, Shab-Bidar S, et al. Sodium status and the metabolic syndrome: A systematic review and meta-analysis of observational studies. *Crit Rev Food Sci Nutr* 2019;59(2):196-206. doi: 10.1080/10408398.2017.1363710 [published Online First: 2017/08/29]
109. Song B, Liu K, Gao Y, et al. Lycopene and risk of cardiovascular diseases: A meta-analysis of observational studies. *Mol Nutr Food Res* 2017;61(9) doi: 10.1002/mnfr.201601009 [published Online First: 2017/03/21]
110. Wang Y, Cui R, Xiao Y, et al. Effect of Carotene and Lycopene on the Risk of Prostate Cancer: A Systematic Review and Dose-Response Meta-Analysis of Observational Studies. *PLoS One* 2015;10(9):e0137427. doi: 10.1371/journal.pone.0137427 [published Online First: 2015/09/16]
111. Xu J, Song C, Song X, et al. Carotenoids and risk of fracture: a meta-analysis of observational studies. *Oncotarget* 2017;8(2):2391-99. doi: 10.18632/oncotarget.13678 [published Online First: 2016/12/03]
112. Yang B, Shi MQ, Li ZH, et al. Fish, Long-Chain n-3 PUFA and Incidence of Elevated Blood Pressure: A Meta-Analysis of Prospective Cohort Studies. *Nutrients* 2016;8(1) doi: 10.3390/nu8010058 [published Online First: 2016/01/26]
113. Zhang Z, Bergan R, Shannon J, et al. The Role of Cruciferous Vegetables and Isothiocyanates for Lung Cancer Prevention: Current Status, Challenges, and Future Research Directions. *Mol Nutr Food Res* 2018;62(18):e1700936. doi: 10.1002/mnfr.201700936 [published Online First: 2018/04/18]
114. Zhao Y, Chen C, Pan W, et al. Comparative efficacy of vitamin D status in reducing the risk of bladder cancer: A systematic review and network meta-analysis. *Nutrition* 2016;32(5):515-23. doi: 10.1016/j.nut.2015.10.023 [published Online First: 2016/01/30]
115. Wan Y, Zheng J, Wang F, et al. Fish, long chain omega-3 polyunsaturated fatty acids consumption, and risk of all-cause mortality: a systematic review and dose-response meta-analysis from 23 independent prospective cohort studies. *Asia Pac J Clin Nutr* 2017;26(5):939-56. doi: 10.6133/apjcn.072017.01 [published Online First: 2017/08/15]
116. Li J, Guasch-Ferre M, Li Y, et al. Dietary intake and biomarkers of linoleic acid and mortality: systematic review and meta-analysis of prospective cohort studies. *Am J Clin Nutr* 2020 doi: 10.1093/ajcn/nqz349 [published Online First: 2020/02/06]
117. Bjelakovic G, Nikolova D, Gluud LL, et al. Antioxidant supplements for prevention of mortality in healthy participants and patients with various diseases. *Cochrane Database Syst Rev* 2012(3):Cd007176. doi: 10.1002/14651858.CD007176.pub2 [published Online First: 2012/03/16]

## Supplementary data

118. Bjelakovic G, Gluud LL, Nikolova D, et al. Vitamin D supplementation for prevention of mortality in adults. *Cochrane Database Syst Rev* 2014a(1):Cd007470. doi: 10.1002/14651858.CD007470.pub3 [published Online First: 2014/01/15]
119. Chowdhury R, Kunutsor S, Vitezova A, et al. Vitamin D and risk of cause specific death: systematic review and meta-analysis of observational cohort and randomised intervention studies. *Bmj* 2014b;348:g1903. doi: 10.1136/bmj.g1903 [published Online First: 2014/04/03]
120. Han J, Guo X, Yu X, et al. 25-Hydroxyvitamin D and Total Cancer Incidence and Mortality: A Meta-Analysis of Prospective Cohort Studies. *Nutrients* 2019;11(10) doi: 10.3390/nu11102295 [published Online First: 2019/09/29]
121. Cormick G, Ciapponi A, Cafferata ML, et al. Calcium supplementation for prevention of primary hypertension. *Cochrane Database Syst Rev* 2015(6):Cd010037. doi: 10.1002/14651858.CD010037.pub2 [published Online First: 2015/07/01]
122. Jayedi A, Zargar MS. Dietary calcium intake and hypertension risk: a dose-response meta-analysis of prospective cohort studies. *Eur J Clin Nutr* 2019;73(7):969-78. doi: 10.1038/s41430-018-0275-y [published Online First: 2018/08/12]
123. De-Regil LM, Peña-Rosas JP, Fernández-Gaxiola AC, et al. Effects and safety of periconceptional oral folate supplementation for preventing birth defects. *Cochrane Database of Systematic Reviews* 2015(12) doi: 10.1002/14651858.CD007950.pub3
124. Blencowe H, Cousens S, Modell B, et al. Folic acid to reduce neonatal mortality from neural tube disorders. *Int J Epidemiol* 2010;39 Suppl 1:i110-21. doi: 10.1093/ije/dyq028 [published Online First: 2010/04/02]
125. Feng Y, Wang S, Chen R, et al. Maternal folic acid supplementation and the risk of congenital heart defects in offspring: a meta-analysis of epidemiological observational studies. *Sci Rep* 2015;5:8506. doi: 10.1038/srep08506 [published Online First: 2015/02/18]
126. El Dib R, Gameiro OL, Ogata MS, et al. Zinc supplementation for the prevention of type 2 diabetes mellitus in adults with insulin resistance. *Cochrane Database Syst Rev* 2015(5):Cd005525. doi: 10.1002/14651858.CD005525.pub3 [published Online First: 2015/05/29]
127. Fernandez-Cao JC, Warthon-Medina M, V HM, et al. Zinc Intake and Status and Risk of Type 2 Diabetes Mellitus: A Systematic Review and Meta-Analysis. *Nutrients* 2019;11(5) doi: 10.3390/nu11051027 [published Online First: 2019/05/11]
128. Hartley L, Igbinedion E, Holmes J, et al. Increased consumption of fruit and vegetables for the primary prevention of cardiovascular diseases. *Cochrane Database Syst Rev* 2013(6):Cd009874. doi: 10.1002/14651858.CD009874.pub2 [published Online First: 2013/06/06]
129. Schwingshackl L, Schwedhelm C, Hoffmann G, et al. Food Groups and Risk of Hypertension: A Systematic Review and Dose-Response Meta-Analysis of Prospective Studies. *Adv Nutr* 2017;8(6):793-803. doi: 10.3945/an.117.017178 [published Online First: 2017/11/17]

## Supplementary data

130. Hartley L, May MD, Loveman E, et al. Dietary fibre for the primary prevention of cardiovascular disease. *Cochrane Database Syst Rev* 2016(1):Cd011472. doi: 10.1002/14651858.CD011472.pub2 [published Online First: 2016/01/14]
131. Hemmingsen B, Gimenez-Perez G, Mauricio D, et al. Diet, physical activity or both for prevention or delay of type 2 diabetes mellitus and its associated complications in people at increased risk of developing type 2 diabetes mellitus. *Cochrane Database Syst Rev* 2017;12:Cd003054. doi: 10.1002/14651858.CD003054.pub4 [published Online First: 2017/12/06]
132. Schwingshackl L, Bogensberger B, Hoffmann G. Diet Quality as Assessed by the Healthy Eating Index, Alternate Healthy Eating Index, Dietary Approaches to Stop Hypertension Score, and Health Outcomes: An Updated Systematic Review and Meta-Analysis of Cohort Studies. *J Acad Nutr Diet* 2018;118(1):74-100.e11. doi: 10.1016/j.jand.2017.08.024 [published Online First: 2017/11/08]
133. Noto H, Goto A, Tsujimoto T, et al. Low-carbohydrate diets and all-cause mortality: a systematic review and meta-analysis of observational studies. *PLoS One* 2013;8(1):e55030. doi: 10.1371/journal.pone.0055030 [published Online First: 2013/02/02]
134. Seidelmann SB, Claggett B, Cheng S, et al. Dietary carbohydrate intake and mortality: a prospective cohort study and meta-analysis. *Lancet Public Health* 2018;3(9):e419-e28. doi: 10.1016/s2468-2667(18)30135-x [published Online First: 2018/08/21]
135. Sartorius K, Sartorius B, Madiba TE, et al. Does high-carbohydrate intake lead to increased risk of obesity? A systematic review and meta-analysis. *BMJ Open* 2018;8(2):e018449. doi: 10.1136/bmjopen-2017-018449 [published Online First: 2018/02/14]
136. Hooper L, Abdelhamid A, Bunn D, et al. Effects of total fat intake on body weight. *Cochrane Database Syst Rev* 2015a(8):Cd011834. doi: 10.1002/14651858.Cd011834 [published Online First: 2015/08/08]
137. Jin H, Leng Q, Li C. Dietary flavonoid for preventing colorectal neoplasms. *Cochrane Database Syst Rev* 2012(8):Cd009350. doi: 10.1002/14651858.CD009350.pub2 [published Online First: 2012/08/17]
138. Kelly SA, Hartley L, Loveman E, et al. Whole grain cereals for the primary or secondary prevention of cardiovascular disease. *Cochrane Database Syst Rev* 2017;8:Cd005051. doi: 10.1002/14651858.CD005051.pub3 [published Online First: 2017/08/25]
139. Ye EQ, Chacko SA, Chou EL, et al. Greater whole-grain intake is associated with lower risk of type 2 diabetes, cardiovascular disease, and weight gain. *J Nutr* 2012;142(7):1304-13. doi: 10.3945/jn.111.155325 [published Online First: 2012/06/01]
140. Mathew MC, Ervin AM, Tao J, et al. Antioxidant vitamin supplementation for preventing and slowing the progression of age-related cataract. *Cochrane Database Syst Rev* 2012(6):Cd004567. doi: 10.1002/14651858.CD004567.pub2 [published Online First: 2012/06/15]

## Supplementary data

141. Jiang H, Yin Y, Wu CR, et al. Dietary vitamin and carotenoid intake and risk of age-related cataract. *Am J Clin Nutr* 2019;109(1):43-54. doi: 10.1093/ajcn/nqy270 [published Online First: 2019/01/10]
142. Jayedi A, Rashidy-Pour A, Parohan M, et al. Dietary Antioxidants, Circulating Antioxidant Concentrations, Total Antioxidant Capacity, and Risk of All-Cause Mortality: A Systematic Review and Dose-Response Meta-Analysis of Prospective Observational Studies. *Adv Nutr* 2018;9(6):701-16. doi: 10.1093/advances/nmy040 [published Online First: 2018/09/22]
143. Xiang S, Dai Z, Man C, et al. Circulating Selenium and Cardiovascular or All-Cause Mortality in the General Population: a Meta-Analysis. *Biol Trace Elem Res* 2019 doi: 10.1007/s12011-019-01847-8 [published Online First: 2019/08/02]
144. Soltani S, Jayedi A, Shab-Bidar S, et al. Adherence to the Mediterranean Diet in Relation to All-Cause Mortality: A Systematic Review and Dose-Response Meta-Analysis of Prospective Cohort Studies. *Adv Nutr* 2019;10(6):1029-39. doi: 10.1093/advances/nmz041 [published Online First: 2019/05/22]
145. Doets EL, van Wijngaarden JP, Szczecinska A, et al. Vitamin B12 intake and status and cognitive function in elderly people. *Epidemiol Rev* 2013;35:2-21. doi: 10.1093/epirev/mxs003 [published Online First: 2012/12/12]
146. Sydenham E, Dangour AD, Lim WS. Omega 3 fatty acid for the prevention of cognitive decline and dementia. *Cochrane Database Syst Rev* 2012(6):Cd005379. doi: 10.1002/14651858.CD005379.pub3 [published Online First: 2012/06/15]
147. Zhang Y, Chen J, Qiu J, et al. Intakes of fish and polyunsaturated fatty acids and mild-to-severe cognitive impairment risks: a dose-response meta-analysis of 21 cohort studies. *Am J Clin Nutr* 2016b;103(2):330-40. doi: 10.3945/ajcn.115.124081 [published Online First: 2016/01/01]
148. Usinger L, Reimer C, Ibsen H. Fermented milk for hypertension. *Cochrane Database Syst Rev* 2012(4):Cd008118. doi: 10.1002/14651858.CD008118.pub2 [published Online First: 2012/04/20]
149. Soedamah-Muthu SS, Verberne LD, Ding EL, et al. Dairy consumption and incidence of hypertension: a dose-response meta-analysis of prospective cohort studies. *Hypertension* 2012;60(5):1131-7. doi: 10.1161/hypertensionaha.112.195206 [published Online First: 2012/09/19]
150. Aune D, Chan DS, Lau R, et al. Dietary fibre, whole grains, and risk of colorectal cancer: systematic review and dose-response meta-analysis of prospective studies. *Bmj* 2011;343:d6617. doi: 10.1136/bmj.d6617 [published Online First: 2011/11/15]
